# Supplementary material
Source: PubMed Central journal article supplement (PMC6462038)
Supplement: 41437_2018_150_MOESM3_ESM.pdf [file 41437_2018_150_MOESM3_ESM.pdf]

Supplementary Table S1 Information on the number of animals and CNV events per population and geographic origin of breed development

| Goat Group | Breed code | Breed_Country code | Breed name                     | Continent   | Country    | Number of Individual | Number of CNV event |
|------------|------------|--------------------|--------------------------------|-------------|------------|----------------------|---------------------|
| WAS        | ANK        | ANK_TR             | Ankara                         | Middle East | TURKEY     | 4                    | 27                  |
|            | KIL        | KIL_TR             | Kil                            | Middle east | TURKEY     | 12                   | 54                  |
|            | KLS        | KLS_TR             | Kilis                          | Middle east | TURKEY     | 37                   | 144                 |
| EME        | ARG        | ARG_IT             | Argentata                      | Europe      | Italy      | 22                   | 63                  |
|            | ASP        | ASP_IT             | Aspromontana                   | Europe      | Italy      | 20                   | 54                  |
|            | CCG        | CCG_IT             | Ciociera Grigia                | Europe      | Italy      | 15                   | 42                  |
|            | DIT        | DIT_IT             | Di Teramo                      | Europe      | Italy      | 20                   | 59                  |
|            | GAR        | GAR_IT             | Garganica                      | Europe      | Italy      | 18                   | 209                 |
|            | GGT        | GGT_IT             | Girgentana                     | Europe      | Italy      | 24                   | 76                  |
|            | JON        | JON_IT             | Jonica                         | Europe      | Italy      | 15                   | 305                 |
|            | MLS        | MLS_IT             | Maltese sarda                  | Europe      | Italy      | 4                    | 57                  |
|            | MLT        | MLT_IT             | Maltese                        | Europe      | Italy      | 16                   | 69                  |
|            | RME        | RME_IT             | Rossa Mediterranea             | Europe      | Italy      | 34                   | 381                 |
| SAR        | SAR_IT     | Sarda              | Europe                         | Italy       | 7          | 54                   |                     |
| ANE        | ALP        | ALP_IT             | Alpine (Camosciata delle Alpi) | Europe      | Italy      | 16                   | 68                  |
|            | LNR        | LNR_DK             | Landrace Goat                  | Europe      | Denmark    | 53                   | 125                 |
|            | NIC        | NIC_IT             | Nicastrese                     | Europe      | Italy      | 21                   | 121                 |
|            | SAA        | SAA_IT             | Saanen                         | Worldwide   | Italy      | 13                   | 27                  |
| MAD        | DIA        | DIA_MG             | Diana                          | Africa      | Madagascar | 17                   | 132                 |
|            | SOF        | SOF_MG             | Sofia                          | Africa      | Madagascar | 24                   | 231                 |
|            | AND        | AND_MG             | Androy                         | Africa      | Madagascar | 6                    | 31                  |
|            | MEN        | MEN_MG             | Menabe                         | Africa      | Madagascar | 21                   | 203                 |
|            | SOU        | SOU_MG             | Sud Ouest                      | Africa      | Madagascar | 10                   | 50                  |
| NWA        | NAI        | NAI_ML             | Naine                          | Africa      | Mali       | 17                   | 46                  |
|            | SDN        | SDN_ML             | Soudanaise                     | Africa      | Mali       | 22                   | 66                  |
|            | RSK        | RSK_NG             | Red Sokoto                     | Africa      | Nigeria    | 18                   | 59                  |
|            | CAM        | CAM_CM             | Cameroon Goat                  | Africa      | Cameroon   | 34                   | 714                 |
|            | SHL        | SHL_NG             | Sahel                          | Africa      | Nigeria    | 20                   | 92                  |
|            | GUE        | GUE_ML             | Guera                          | Africa      | Mali       | 24                   | 130                 |
|            | WAD        | WAD_NG             | West African Dwarf             | Africa      | Nigeria    | 18                   | 41                  |
|            | WAD        | WAD_CM             | West African Dwarf             | Africa      | Cameroon   | 29                   | 602                 |
| SEA        | GAZ        | GAZ_MZ             | Gaza                           | Africa      | Mozambique | 4                    | 10                  |
|            | LND        | LND_MZ             | Landin                         | Africa      | Mozambique | 29                   | 74                  |
|            | MAN        | MAN_MZ             | Manica                         | Africa      | Mozambique | 2                    | 6                   |
|            | NSJ        | NSJ_MW             | Nsanje                         | Africa      | Malawi     | 2                    | 10                  |
|            | PAF        | PAF_MZ             | Pafuri                         | Africa      | Mozambique | 4                    | 11                  |
|            | THY        | THY_MW             | Thyolo                         | Africa      | Malawi     | 7                    | 18                  |
|            | MSH        | MSH_ZW             | Mashona                        | Africa      | Zimbabwe   | 21                   | 124                 |
|            | SEA        | SEA_KE             | Small East African             | Africa      | Kenya      | 26                   | 109                 |
|            | SEA        | SEA_MZ             | Small East African             | Africa      | Mozambique | 6                    | 15                  |
|            | SEA        | SEA_UG             | Small East African             | Africa      | Uganda     | 11                   | 76                  |
|            | ABR        | ABR_ET             | Abergelle                      | Africa      | Ethiopia   | 44                   | 148                 |
|            | CRO        | CRO_UG             | Local Cross                    | Africa      | Uganda     | 5                    | 39                  |
|            | GAL        | GAL_KE             | Galla                          | Africa      | Kenya      | 22                   | 71                  |
|            | GOG        | GOG_TZ             | Gogo                           | Africa      | Tanzania   | 11                   | 54                  |
|            | GUM        | GUM_ET             | Gumez                          | Africa      | Ethiopia   | 38                   | 148                 |
|            | KAR        | KAR_UG             | Karamonja                      | Africa      | Uganda     | 18                   | 119                 |
|            | KEF        | KEF_ET             | Keffa                          | Africa      | Ethiopia   | 46                   | 357                 |
| MAA        | MAA_TZ     | Maasai             | Africa                         | Tanzania    | 18         | 66                   |                     |
| PRW        | PRW_TZ     | Pare White         | Africa                         | Tanzania    | 19         | 61                   |                     |
| SEB        | SEB_UG     | Sebei              | Africa                         | Uganda      | 23         | 118                  |                     |
| WYG        | WYG_ET     | Woyito Guji        | Africa                         | Ethiopia    | 42         | 238                  |                     |
| SNJ        | SNJ_TZ     | Sonjo              | Africa                         | Tanzania    | 14         | 82                   |                     |
