# Supplementary material
Source: PubMed Central journal article supplement (PMC6462038)
Supplement: 41437_2018_150_MOESM4_ESM.pdf [file 41437_2018_150_MOESM4_ESM.pdf]

Supplementary Table S2 Primers and results for CNV validations by qPCR

| GENE  | Forward Pri         | Reverse Pri | CN qPCR        | CN PennCNV | ADAPTmap code | Goat Group | Breed name  | Validation result |
|-------|---------------------|-------------|----------------|------------|---------------|------------|-------------|-------------------|
|       |                     |             | 2              |            | control       |            |             |                   |
|       |                     |             | 1 cn=2         |            | MG_AND0006    | MAD        | Androy      | 0                 |
|       |                     |             | 0 cn=2         |            | KE_GAL0011    | SEA        | Galla       | 0                 |
| AHCY  | ACACATGACGACTCAAGC  |             | 2 cn=2         |            | ML_GUE0024    | NWA        | Guera       | 1                 |
|       |                     |             | 28 state5,cn=3 |            | MG_SOF0023    | MAD        | Sofia       | 1                 |
|       |                     |             | 42 state5,cn=3 |            | ET_ABR0027    | SEA        | Abergelle   | 1                 |
|       |                     |             | 2 state5,cn=3  |            | CM_WAD0026    | NWA        | WAD         | 0                 |
|       |                     |             | 2              |            | control       |            |             |                   |
| ASIP  | CTCTCCCGAGTGGTCTGG  |             | 0 cn=2         |            | MG_AND0006    | MAD        | Androy      | 0                 |
|       |                     |             | 1 cn=2         |            | ML_GUE0011    | NWA        | Guera       | 0                 |
|       |                     |             | 7 state5,cn=3  |            | TZ_SNJ0016    | SEA        | Sonjo       | 1                 |
|       |                     |             | 2              |            | control       |            |             |                   |
|       |                     |             | 1 cn=2         |            | MG_AND0006    | MAD        | Androy      | 0                 |
|       |                     |             | 2 cn=2         |            | ET_GUM0023    | SEA        | Gumez       | 1                 |
|       |                     |             | 1 cn=2         |            | TZ_MAA0005    | SEA        | Maasai      | 0                 |
| ITCH  | IAGCCAGTAGTGGTACTT  |             | 10 state5,cn=3 |            | TZ_SNJ0016    | SEA        | Sonjo       | 1                 |
|       |                     |             | 3 state5,cn=3  |            | KE_SEA0015    | SEA        | SEA         | 1                 |
|       |                     |             | 5 state5,cn=3  |            | ZW_MSH0018    | SEA        | Mashona     | 1                 |
|       |                     |             | 17 state2,cn=1 |            | ML_SDN0006    | NWA        | Soundanaise | 0                 |
|       |                     |             | 2              |            | control       |            |             |                   |
|       |                     |             | 4 cn=2         |            | MG_SOF0021    | MAD        | Sofia       | 0                 |
|       |                     |             | 2 cn=2         |            | ML_GUE0011    | NWA        | Guera       | 1                 |
| EDNRA | JACGCTCTCTGTGGAGAAA |             | 3 cn=2         |            | ET_ABR0011    | SEA        | Abergelle   | 0                 |
|       |                     |             | 18 state5,cn=3 |            | MG_AND0006    | MAD        | Androy      | 1                 |
|       |                     |             | 24 state5,cn=3 |            | KE_GAL0011    | SEA        | Galla       | 1                 |
|       |                     |             | 33 state5,cn=3 |            | ET_GUM0023    | SEA        | Gumez       | 1                 |
|       |                     |             | 2              |            | control       |            |             |                   |
|       |                     |             | 1 cn=2         |            | TZ_SNJ0016    | SEA        | Sonjo       | 0                 |
|       |                     |             | 2 cn=2         |            | ET_ABR0027    | SEA        | Abergelle   | 1                 |
| NR3C2 | GCGACTTGTSAAACTTAA  |             | 2 cn=2         |            | KE_GAL0011    | SEA        | Galla       | 1                 |
|       |                     |             | 22 state5,cn=3 |            | MG_SOF0021    | MAD        | Sofia       | 1                 |
|       |                     |             | 13 state5,cn=3 |            | ML_GUE0011    | NWA        | Guera       | 1                 |
|       |                     |             | 1 state5,cn=3  |            | ET_ABR0011    | SEA        | Abergelle   | 0                 |
|       |                     |             | 2              |            | control       |            |             |                   |
|       |                     |             | 2 cn=2         |            | MG_AND0006    | MAD        | Androy      | 1                 |
|       |                     |             | 1 cn=2         |            | ML_GUE0011    | NWA        | Guera       | 0                 |
| DGAT1 | TCCAAATTGATCCTGCTC  |             | 2 cn=2         |            | KE_GAL0011    | SEA        | Galla       | 1                 |
|       |                     |             | 1 state2,cn=1  |            | MG_SOF0024    | MAD        | Sofia       | 1                 |
|       |                     |             | 1 state2,cn=1  |            | TZ_MAA0005    | SEA        | Maasai      | 1                 |
|       |                     |             | 2 state2,cn=1  |            | ML_SDN0006    | NWA        | Soundanaise | 0                 |
|       |                     |             | 2 state1,cn=0  |            | ML_GUE0024    | NWA        | Guera       | 0                 |

**Comment:**

Gene: Primers for MC1R(reference gene); Forward Primer Seq: CTCGTTGGCCTTTCATAGC; Reverse Primer Seq: GAAGTCTTGAAGATGCAGCC

CN\_qPCR: Copy number was calculated by the 2X2-ΔΔCT method using qPCR. Control mean the reference samples selected from outgroup, which included three Saanen and three Alpine goats.

CN\_PENCNV: CNV call results by PennCNV. cn=2 mean copy number normal; state1,cn=0 and state2,cn=1 mean copy number loss; state5,cn=3 mean copy number gain.

Validation result: 1 mean the gene copy number status calculated by two methods were consistent in terms of CNV direction, while 0 mean they were not consistent. The accuracy percent (57%)=Number of consistan (20)/Number of total tests (35)
