# Supplementary material
Source: PubMed Central journal article supplement (PMC6462038)
Supplement: 41437_2018_150_MOESM5_ESM.pdf [file 41437_2018_150_MOESM5_ESM.pdf]

Supplementary Table S3 Group-specific CNV regions

| NO.   | CNVR  | CHR       | START     | END                       | CNVR    | Length | NO. CNV count | CNV count/Sample count | CNV count within each group |          |         |         |          |          |          |          |         |         | VAR    |          |          |
|-------|-------|-----------|-----------|---------------------------|---------|--------|---------------|------------------------|-----------------------------|----------|---------|---------|----------|----------|----------|----------|---------|---------|--------|----------|----------|
|       |       |           |           |                           |         |        |               |                        | SEA(412)                    | NWA(182) | MAD(78) | WAS(53) | EME(195) | ANE(103) | SEA(412) | NWA(182) | MAD(78) | WAS(53) |        | EME(195) | ANE(103) |
| CNV1  | chr17 | 59870207  | 61165682  | chr17:59870207-61165682   | 1286376 | 402    | 0.3930        | 208                    | 57                          | 42       | 0       | 95      | 0        | 5049     | 0.3132   | 0.5385   | 0.0000  | 0.4872  | 0.0000 | 0.0627   |          |
| CNV2  | chr5  | 36233025  | 36842273  | chr5:36233025-36842273    | 609249  | 249    | 0.2268        | 37                     | 47                          | 1        | 32      | 97      | 18       | 0898     | 0.2582   | 0.1178   | 0.6038  | 0.4974  | 0.1748 | 0.0542   |          |
| CNV3  | chr12 | 13172367  | 13612196  | chr12:13172367-13612196   | 448830  | 149    | 0.1457        | 64                     | 27                          | 8        | 11      | 23      | 16       | 0553     | 0.1703   | 0.1026   | 0.2075  | 0.1179  | 0.1553 | 0.0013   |          |
| CNV4  | chr13 | 63116183  | 63416183  | chr13:63116183-63416183   | 298661  | 143    | 0.1398        | 10                     | 26                          | 3        | 15      | 24      | 24       | 1        | 0139     | 0.1278   | 0.0000  | 0.1233  | 0.1233 | 0.0047   |          |
| CNV5  | chr16 | 77668969  | 79353771  | chr16:77668969-79353771   | 1684803 | 140    | 0.1369        | 19                     | 63                          | 11       | 0       | 40      | 7        | 0461     | 0.3462   | 0.1410   | 0.0000  | 0.2051  | 0.0680 | 0.0160   |          |
| CNV6  | chr16 | 116288145 | 117571225 | chr16:116288145-117571225 | 1283081 | 121    | 0.1183        | 5                      | 66                          | 9        | 0       | 34      | 7        | 0121     | 0.3626   | 0.1154   | 0.0000  | 0.1744  | 0.0680 | 0.0181   |          |
| CNV7  | chr20 | 70385615  | 71781295  | chr20:70385615-71781295   | 1395681 | 121    | 0.1183        | 3                      | 79                          | 13       | 0       | 21      | 5        | 0073     | 0.4341   | 0.1164   | 0.0000  | 0.1077  | 0.0485 | 0.0266   |          |
| CNV8  | chr3  | 80113767  | 80623489  | chr3:80113767-80623489    | 848583  | 108    | 0.1056        | 51                     | 16                          | 36       | 3       | 1       | 1        | 1238     | 0.0879   | 0.4615   | 0.0566  | 0.0051  | 0.0097 | 0.0294   |          |
| CNV9  | chr14 | 80740427  | 81602889  | chr14:80740427-81602889   | 862463  | 102    | 0.0997        | 8                      | 65                          | 4        | 0       | 19      | 6        | 0194     | 0.3571   | 0.0513   | 0.0000  | 0.0974  | 0.0583 | 0.0173   |          |
| CNV10 | chr25 | 41347812  | 42840304  | chr25:41347812-42840304   | 1492493 | 89     | 0.0870        | 3                      | 39                          | 6        | 1       | 34      | 6        | 0073     | 0.2143   | 0.0769   | 0.0189  | 0.1744  | 0.0583 | 0.0174   |          |
| CNV11 | chr26 | 58230     | 1314865   | chr26:58230-1314865       | 1256636 | 87     | 0.0850        | 5                      | 50                          | 10       | 0       | 15      | 4        | 0121     | 0.2747   | 0.1667   | 0.0000  | 0.0769  | 0.0388 | 0.0111   |          |
| CNV12 | chr8  | 11579886  | 11259717  | chr8:11579886-11259717    | 1211832 | 79     | 0.0772        | 8                      | 38                          | 9        | 0       | 22      | 2        | 0194     | 0.2088   | 0.1154   | 0.0000  | 0.1128  | 0.0194 | 0.0065   |          |
| CNV13 | chr22 | 58520379  | 60193667  | chr22:58520379-60193667   | 1673289 | 76     | 0.0743        | 0                      | 43                          | 5        | 0       | 23      | 5        | 0000     | 0.2363   | 0.0641   | 0.0000  | 0.1179  | 0.0985 | 0.0080   |          |
| CNV14 | chr11 | 10529562  | 106216293 | chr11:10529562-106216293  | 916732  | 76     | 0.0743        | 1                      | 44                          | 10       | 0       | 18      | 3        | 0024     | 0.2438   | 0.1282   | 0.0000  | 0.0923  | 0.0291 | 0.0087   |          |
| CNV15 | chr1  | 150457042 | 150859489 | chr1:150457042-150859489  | 402448  | 74     | 0.0723        | 10                     | 7                           | 0        | 0       | 12      | 37       | 8        | 0243     | 0.0385   | 0.0000  | 0.2264  | 0.1897 | 0.0777   | 0.0087   |
| CNV16 | chr14 | 28922229  | 29386286  | chr14:28922229-29386286   | 594058  | 70     | 0.0684        | 28                     | 15                          | 17       | 7       | 3       | 0        | 0680     | 0.0824   | 0.2179   | 0.1321  | 0.0154  | 0.0000 | 0.0065   |          |
| CNV17 | chr19 | 61491917  | 62508113  | chr19:61491917-62508113   | 1016197 | 69     | 0.0674        | 3                      | 37                          | 8        | 0       | 19      | 2        | 0073     | 0.2033   | 0.1026   | 0.0000  | 0.0974  | 0.0194 | 0.0062   |          |
| CNV18 | chr5  | 75604240  | 77148831  | chr5:75604240-77148831    | 1544592 | 69     | 0.0674        | 53                     | 3                           | 9        | 2       | 1       | 1        | 1286     | 0.0165   | 0.1154   | 0.0000  | 0.0771  | 0.0051 | 0.0097   | 0.0031   |
| CNV19 | chr24 | 59148115  | 59684957  | chr24:59148115-59684957   | 536843  | 56     | 0.0547        | 45                     | 8                           | 1        | 2       | 0       | 0        | 1092     | 0.0440   | 0.0128   | 0.0377  | 0.0000  | 0.0000 | 0.0017   |          |
| CNV20 | chr6  | 70672314  | 71044838  | chr6:70672314-71044838    | 3732520 | 50     | 0.0489        | 17                     | 4                           | 1        | 0       | 26      | 0        | 0413     | 0.0303   | 0.0128   | 0.0489  | 0.1333  | 0.0000 | 0.0025   |          |
| CNV21 | chr4  | 120285448 | 120714350 | chr4:120285448-120714350  | 428903  | 49     | 0.0479        | 4                      | 16                          | 2        | 0       | 19      | 0        | 0097     | 0.0879   | 0.1026   | 0.0377  | 0.0974  | 0.0000 | 0.0021   |          |
| CNV22 | chr9  | 90879554  | 91586636  | chr9:90879554-91586636    | 657063  | 48     | 0.0469        | 1                      | 19                          | 8        | 0       | 25      | 1        | 0024     | 0.1044   | 0.0256   | 0.0000  | 0.1282  | 0.0097 | 0.0032   |          |
| CNV23 | chr27 | 53296     | 297811    | chr27:53296-297811        | 244886  | 45     | 0.0446        | 14                     | 6                           | 3        | 5       | 13      | 7        | 0048     | 0.0330   | 0.0000   | 0.0943  | 0.0667  | 0.0680 | 0.0011   |          |
| CNV24 | chr7  | 47788379  | 48834600  | chr7:47788379-48834600    | 1046222 | 44     | 0.0430        | 26                     | 3                           | 2        | 1       | 9       | 9        | 0        | 0621     | 0.0165   | 0.0256  | 0.0189  | 0.0052 | 0.0291   | 0.0033   |
| CNV25 | chr6  | 8614278   | 8614278   | chr6:8614278-8614278      | 1386057 | 43     | 0.0420        | 24                     | 9                           | 6        | 1       | 1       | 2        | 0583     | 0.0495   | 0.0769   | 0.0189  | 0.0051  | 0.0194 | 0.0008   |          |
| CNV26 | chr3  | 95491550  | 95583652  | chr3:95491550-95583652    | 92103   | 43     | 0.0420        | 42                     | 0                           | 0        | 0       | 1       | 0        | 1019     | 0.0000   | 0.0000   | 0.0000  | 0.0051  | 0.0000 | 0.0017   |          |
| CNV27 | chr7  | 107678302 | 108372414 | chr7:107678302-108372414  | 694113  | 40     | 0.0391        | 21                     | 2                           | 1        | 2       | 13      | 1        | 0510     | 0.0110   | 0.0128   | 0.0377  | 0.0667  | 0.0097 | 0.0006   |          |
| CNV28 | chr29 | 50937615  | 51309969  | chr29:50937615-51309969   | 372355  | 38     | 0.0371        | 1                      | 15                          | 1        | 0       | 19      | 2        | 0024     | 0.0824   | 0.0128   | 0.0000  | 0.0974  | 0.0194 | 0.0018   |          |
| CNV29 | chr6  | 114348987 | 116039905 | chr6:114348987-116039905  | 1690919 | 38     | 0.0371        | 2                      | 26                          | 1        | 0       | 8       | 1        | 0049     | 0.1429   | 0.0128   | 0.0000  | 0.0410  | 0.0097 | 0.0030   |          |
| CNV30 | chr21 | 68219498  | 68844436  | chr21:68219498-68844436   | 624939  | 37     | 0.0362        | 2                      | 22                          | 3        | 0       | 8       | 2        | 0049     | 0.1209   | 0.0385   | 0.0000  | 0.0410  | 0.0194 | 0.0020   |          |
| CNV31 | chr13 | 82673905  | 83017136  | chr13:82673905-83017136   | 343232  | 37     | 0.0362        | 0                      | 16                          | 3        | 0       | 17      | 0        | 0000     | 0.0879   | 0.0513   | 0.0000  | 0.0872  | 0.0000 | 0.0019   |          |
| CNV32 | chr12 | 112348625 | 112610616 | chr12:112348625-112610616 | 261992  | 37     | 0.0362        | 28                     | 1                           | 8        | 0       | 0       | 0        | 0680     | 0.0055   | 0.1026   | 0.0000  | 0.0000  | 0.0000 | 0.0020   |          |
| CNV33 | chr12 | 63339     | 12515586  | chr12:63339-12515586      | 631835  | 34     | 0.0332        | 0                      | 2                           | 0        | 0       | 2       | 1        | 0098     | 0.1319   | 0.0897   | 0.0000  | 0.0193  | 0.0097 | 0.0022   |          |
| CNV34 | chr9  | 92780023  | 92971032  | chr9:92780023-92971032    | 1850231 | 33     | 0.0323        | 0                      | 20                          | 0        | 0       | 15      | 16       | 0000     | 0.0110   | 0.0000   | 0.0000  | 0.0769  | 0.1553 | 0.0041   |          |
| CNV35 | chr14 | 94209873  | 94652327  | chr14:94209873-94652327   | 442455  | 33     | 0.0323        | 2                      | 16                          | 4        | 0       | 11      | 0        | 0049     | 0.0879   | 0.0513   | 0.0000  | 0.0564  | 0.0000 | 0.0014   |          |
| CNV36 | chr23 | 185718    | 1440908   | chr23:185718-1440908      | 1255191 | 32     | 0.0313        | 1                      | 23                          | 4        | 0       | 3       | 1        | 0024     | 0.1264   | 0.0513   | 0.0000  | 0.0154  | 0.0097 | 0.0024   |          |
| CNV37 | chr27 | 44465373  | 44641641  | chr27:44465373-44641641   | 176269  | 32     | 0.0313        | 2                      | 15                          | 5        | 0       | 10      | 0        | 0049     | 0.0824   | 0.0641   | 0.0000  | 0.0513  | 0.0000 | 0.0013   |          |
| CNV38 | chr4  | 115612273 | 115949298 | chr4:115612273-115949298  | 337026  | 31     | 0.0303        | 29                     | 1                           | 0        | 0       | 0       | 0        | 0704     | 0.0055   | 0.0128   | 0.0000  | 0.0000  | 0.0000 | 0.0008   |          |
| CNV39 | chr25 | 218326    | 1683430   | chr25:218326-1683430      | 1465105 | 30     | 0.0293        | 0                      | 13                          | 1        | 0       | 13      | 3        | 0000     | 0.0714   | 0.0128   | 0.0000  | 0.0667  | 0.0291 | 0.0010   |          |
| CNV40 | chr1  | 156930272 | 157299677 | chr1:156930272-157299677  | 369406  | 29     | 0.0283        | 0                      | 15                          | 6        | 0       | 8       | 0        | 0000     | 0.0824   | 0.0769   | 0.0283  | 0.0410  | 0.0000 | 0.0015   |          |
| CNV41 | chr10 | 78740921  | 79131485  | chr10:78740921-79131485   | 390565  | 29     | 0.0283        | 24                     | 4                           | 0        | 0       | 1       | 0        | 0583     | 0.0220   | 0.0000   | 0.0000  | 0.0051  | 0.0000 | 0.0005   |          |
| CNV42 | chr15 | 80227505  | 81898682  | chr15:80227505-81898682   | 1671180 | 28     | 0.0274        | 1                      | 20                          | 3        | 0       | 4       | 0        | 0024     | 0.1099   | 0.0385   | 0.0000  | 0.0205  | 0.0000 | 0.0018   |          |
| CNV43 | chr15 | 3267702   | 4917718   | chr15:3267702-4917718     | 1704018 | 28     | 0.0274        | 20                     | 1                           | 3        | 2       | 2       | 0        | 0485     | 0.0000   | 0.0000   | 0.0377  | 0.0000  | 0.0000 | 0.0008   |          |
| CNV44 | chr3  | 66082520  | 66718407  | chr3:66082520-66718407    | 620250  | 27     | 0.0264        | 8                      | 0                           | 0        | 0       | 14      | 2        | 0194     | 0.0165   | 0.0000   | 0.0000  | 0.0719  | 0.0194 | 0.0007   |          |
| CNV45 | chr10 | 78039610  | 78581876  | chr10:78039610-78581876   | 542267  | 26     | 0.0254        | 0                      | 0                           | 0        | 0       | 11      | 15       | 0000     | 0.0000   | 0.0000   | 0.0000  | 0.0564  | 0.1456 | 0.0035   |          |
| CNV46 | chr24 | 220589    | 1103061   | chr24:220589-1103061      | 882473  | 25     | 0.0244        | 1                      | 11                          | 3        | 0       | 9       | 1        | 0024     | 0.0604   | 0.0385   | 0.0000  | 0.0462  | 0.0097 | 0.0006   |          |
| CNV47 | chr14 | 332064    | 1054637   | chr14:332064-1054637      | 722574  | 24     | 0.0235        | 2                      | 9                           | 2        | 3       | 7       | 1        | 0049     | 0.0495   | 0.0256   | 0.0566  | 0.0359  | 0.0097 | 0.0004   |          |
| CNV48 | chr5  | 117814803 | 118948578 | chr5:117814803-118948578  | 1133776 | 24     | 0.0235        | 1                      | 1                           | 0        | 0       | 7       | 1        | 0024     | 0.0495   | 0.0769   | 0.0000  | 0.0359  | 0.0097 | 0.0009   |          |
| CNV49 | chr14 | 32404327  | 32713850  | chr14:32404327-32713850   | 309524  | 24     | 0.0235        | 14                     | 2                           | 5        | 3       | 0       | 0        | 0340     | 0.0110   | 0.0641   | 0.0566  | 0.0000  | 0.0000 | 0.0008   |          |
| CNV50 | chr12 | 7855625   | 79016897  | chr12:7855625-79016897    | 461273  | 24     | 0.0235        | 21                     | 2                           | 1        | 0       | 0       | 0        | 0510     | 0.0110   | 0.0128   | 0.0000  | 0.0000  | 0.0000 | 0.0004   |          |
| CNV51 | chr29 | 45588359  | 46608475  | chr29:45588359-46608475   | 1020117 | 23     | 0.0225        | 2                      | 9                           | 2        | 0       | 7       | 3        | 0049     | 0.0495   | 0.0256   | 0.0000  | 0.0359  | 0.0291 | 0.0004   |          |
| CNV52 | chr5  | 57439660  | 57670371  | chr5:57439660-57670371    | 230712  | 23     | 0.0225        | 20                     | 2                           | 0        | 0       | 0       | 0        | 0485     | 0.0110   | 0.0000   | 0.0189  | 0.0000  | 0.0000 | 0.0004   |          |
| CNV53 | chr24 | 2658026   | 26584061  | chr24:2658026-26584061    | 3814061 | 22     | 0.0215        | 16                     | 0                           | 0        | 1       | 3       | 2        | 0388     | 0.0000   | 0.0000   | 0.0189  | 0.0154  | 0.0194 | 0.0002   |          |
| CNV54 | chr15 | 3495616   | 1327111   | chr15:3495616-1327111     | 978096  | 22     | 0.0215        | 4                      | 14                          | 9        | 0       | 1       | 0        | 0024     | 0.0769   | 0.0128   | 0.0000  | 0.0256  | 0.0097 | 0.0008   |          |
| CNV55 | chr14 | 78440252  | 79000166  | chr14:78440252-79000166   | 559915  | 22     | 0.0215        | 0                      | 17                          | 0        | 0       | 4       | 1        | 0000     | 0.0934   | 0.0000   | 0.0000  | 0.0205  | 0.0097 | 0.0013   |          |
| CNV56 | chr1  | 38979096  | 39793993  | chr1:38979096-39793993    | 996898  | 22     | 0.0205        | 8                      | 3                           | 0        | 3       | 4       | 4        | 0194     | 0.0165   | 0.0000   | 0.0566  | 0.0154  | 0.0388 | 0.0004   |          |
| CNV57 | chr29 | 48        |           |                           |         |        |               |                        |                             |          |         |         |          |          |          |          |         |         |        |          |          |

|         |       |           |           |                          |         |   |        |   |   |   |   |   |   |        |        |        |        |        |        |        |
|---------|-------|-----------|-----------|--------------------------|---------|---|--------|---|---|---|---|---|---|--------|--------|--------|--------|--------|--------|--------|
| CNVR124 | chr11 | 51130976  | 51393615  | chr11:51130976-51393615  | 262640  | 8 | 0.0078 | 2 | 0 | 0 | 3 | 2 | 1 | 0.0049 | 0.0000 | 0.0000 | 0.0566 | 0.0103 | 0.0097 | 0.0005 |
| CNVR125 | chr7  | 1079      | 127968    | chr7:1079-127968         | 126890  | 8 | 0.0078 | 2 | 4 | 0 | 1 | 0 | 1 | 0.0049 | 0.0220 | 0.0000 | 0.0189 | 0.0000 | 0.0097 | 0.0001 |
| CNVR126 | chr23 | 15028145  | 15342928  | chr23:15028145-15342928  | 334784  | 8 | 0.0078 | 0 | 3 | 4 | 0 | 0 | 1 | 0.0000 | 0.0165 | 0.0513 | 0.0000 | 0.0000 | 0.0097 | 0.0004 |
| CNVR127 | chr2  | 13606596  | 13647568  | chr2:13606596-13647568   | 389063  | 8 | 0.0078 | 2 | 2 | 2 | 0 | 4 | 0 | 0.0000 | 0.0110 | 0.0256 | 0.0000 | 0.0205 | 0.0000 | 0.0001 |
| CNVR128 | chr5  | 57721248  | 58533613  | chr5:57721248-58533613   | 612366  | 8 | 0.0078 | 0 | 3 | 1 | 1 | 0 | 0 | 0.0000 | 0.0165 | 0.0128 | 0.0000 | 0.0205 | 0.0000 | 0.0001 |
| CNVR129 | chr13 | 33586484  | 34013864  | chr13:33586484-34013864  | 428241  | 8 | 0.0078 | 3 | 0 | 0 | 2 | 3 | 0 | 0.0073 | 0.0000 | 0.0000 | 0.0377 | 0.0154 | 0.0000 | 0.0002 |
| CNVR130 | chr7  | 1227401   | 3304872   | chr7:1227401-3304872     | 1777472 | 8 | 0.0078 | 1 | 1 | 0 | 3 | 3 | 0 | 0.0024 | 0.0055 | 0.0385 | 0.0000 | 0.0154 | 0.0000 | 0.0002 |
| CNVR131 | chr23 | 45010453  | 45458947  | chr23:45010453-45458947  | 448495  | 8 | 0.0078 | 0 | 4 | 2 | 0 | 2 | 0 | 0.0000 | 0.0220 | 0.0256 | 0.0000 | 0.0103 | 0.0000 | 0.0001 |
| CNVR132 | chr17 | 63012634  | 63391313  | chr17:63012634-63391313  | 378680  | 8 | 0.0078 | 0 | 5 | 1 | 0 | 2 | 0 | 0.0000 | 0.0275 | 0.0128 | 0.0000 | 0.0103 | 0.0000 | 0.0001 |
| CNVR133 | chr18 | 15106987  | 15464370  | chr18:15106987-15464370  | 357384  | 8 | 0.0078 | 2 | 4 | 0 | 0 | 2 | 0 | 0.0049 | 0.0220 | 0.0000 | 0.0000 | 0.0103 | 0.0000 | 0.0001 |
| CNVR134 | chr15 | 56634137  | 56889979  | chr15:56634137-56889979  | 264843  | 8 | 0.0078 | 0 | 6 | 0 | 1 | 1 | 0 | 0.0000 | 0.0330 | 0.0000 | 0.0189 | 0.0051 | 0.0000 | 0.0002 |
| CNVR135 | chr1  | 34649750  | 34770996  | chr1:34649750-34770996   | 121247  | 8 | 0.0078 | 7 | 0 | 0 | 0 | 1 | 0 | 0.0070 | 0.0000 | 0.0000 | 0.0000 | 0.0051 | 0.0000 | 0.0000 |
| CNVR136 | chr18 | 46661188  | 46870162  | chr18:46661188-46870162  | 208975  | 8 | 0.0078 | 7 | 0 | 0 | 0 | 1 | 0 | 0.0170 | 0.0000 | 0.0000 | 0.0000 | 0.0051 | 0.0000 | 0.0000 |
| CNVR137 | chr5  | 108840    | 860995    | chr5:108840-860995       | 752156  | 8 | 0.0078 | 6 | 0 | 0 | 2 | 0 | 0 | 0.0146 | 0.0000 | 0.0000 | 0.0377 | 0.0000 | 0.0000 | 0.0002 |
| CNVR138 | chr27 | 5100808   | 5417544   | chr27:5100808-5417544    | 316737  | 8 | 0.0078 | 2 | 2 | 4 | 0 | 0 | 0 | 0.0049 | 0.0110 | 0.0513 | 0.0000 | 0.0000 | 0.0000 | 0.0004 |
| CNVR140 | chr26 | 23897893  | 54146151  | chr26:23897893-54146151  | 646259  | 8 | 0.0078 | 2 | 3 | 3 | 0 | 0 | 0 | 0.0049 | 0.0165 | 0.0385 | 0.0000 | 0.0000 | 0.0000 | 0.0002 |
| CNVR141 | chr26 | 28287024  | 28446758  | chr26:28287024-28446758  | 159735  | 8 | 0.0078 | 6 | 0 | 0 | 0 | 0 | 0 | 0.0146 | 0.0000 | 0.0256 | 0.0000 | 0.0000 | 0.0000 | 0.0001 |
| CNVR141 | chr3  | 5125312   | 5705846   | chr3:5125312-5705846     | 580535  | 8 | 0.0078 | 0 | 7 | 1 | 0 | 0 | 0 | 0.0000 | 0.0385 | 0.0128 | 0.0000 | 0.0000 | 0.0000 | 0.0002 |
| CNVR142 | chr7  | 72722218  | 73055058  | chr7:72722218-73055058   | 328361  | 8 | 0.0078 | 7 | 0 | 1 | 0 | 0 | 0 | 0.0170 | 0.0000 | 0.0128 | 0.0000 | 0.0000 | 0.0000 | 0.0001 |
| CNVR143 | chr2  | 119858841 | 120234079 | chr2:119858841-120234079 | 375239  | 8 | 0.0078 | 8 | 0 | 0 | 0 | 0 | 0 | 0.0194 | 0.0000 | 0.0000 | 0.0000 | 0.0000 | 0.0000 | 0.0001 |
| CNVR144 | chr29 | 38274733  | 39014509  | chr29:38274733-39014509  | 739777  | 7 | 0.0068 | 2 | 0 | 0 | 0 | 4 | 1 | 0.0049 | 0.0000 | 0.0000 | 0.0000 | 0.0205 | 0.0097 | 0.0001 |
| CNVR145 | chr17 | 74218     | 505483    | chr17:74218-505483       | 431266  | 7 | 0.0068 | 0 | 3 | 1 | 0 | 2 | 1 | 0.0000 | 0.0165 | 0.0128 | 0.0000 | 0.0103 | 0.0097 | 0.0000 |
| CNVR146 | chr10 | 2200269   | 2598321   | chr10:2200269-2598321    | 398053  | 7 | 0.0068 | 1 | 3 | 1 | 0 | 1 | 1 | 0.0024 | 0.0165 | 0.0128 | 0.0000 | 0.0051 | 0.0097 | 0.0000 |
| CNVR147 | chr6  | 81904235  | 82574419  | chr6:81904235-82574419   | 670185  | 7 | 0.0068 | 2 | 3 | 0 | 1 | 0 | 1 | 0.0049 | 0.0165 | 0.0000 | 0.0189 | 0.0000 | 0.0097 | 0.0001 |
| CNVR148 | chr21 | 1893967   | 2183843   | chr21:1893967-2183843    | 289877  | 7 | 0.0068 | 0 | 3 | 0 | 1 | 0 | 0 | 0.0000 | 0.0165 | 0.0000 | 0.0000 | 0.0205 | 0.0000 | 0.0001 |
| CNVR149 | chr26 | 45870623  | 46285520  | chr26:45870623-46285520  | 424620  | 7 | 0.0068 | 2 | 0 | 0 | 1 | 3 | 1 | 0.0049 | 0.0000 | 0.0000 | 0.0256 | 0.0000 | 0.0154 | 0.0001 |
| CNVR150 | chr14 | 40440105  | 41216216  | chr14:40440105-41216216  | 806112  | 7 | 0.0068 | 5 | 1 | 1 | 1 | 1 | 1 | 0.0097 | 0.0000 | 0.0128 | 0.0189 | 0.0051 | 0.0000 | 0.0001 |
| CNVR151 | chr10 | 51617654  | 51927535  | chr10:51617654-51927535  | 309882  | 7 | 0.0068 | 5 | 0 | 0 | 1 | 0 | 1 | 0.0021 | 0.0000 | 0.0000 | 0.0189 | 0.0051 | 0.0000 | 0.0001 |
| CNVR152 | chr24 | 3315348   | 4054458   | chr24:3315348-4054458    | 739111  | 7 | 0.0068 | 0 | 2 | 4 | 0 | 1 | 0 | 0.0000 | 0.0110 | 0.0513 | 0.0000 | 0.0051 | 0.0000 | 0.0004 |
| CNVR153 | chr2  | 92655933  | 92753615  | chr2:92655933-92753615   | 97683   | 7 | 0.0068 | 3 | 1 | 2 | 0 | 1 | 0 | 0.0073 | 0.0055 | 0.0256 | 0.0000 | 0.0051 | 0.0000 | 0.0001 |
| CNVR154 | chr12 | 12830122  | 12972454  | chr12:12830122-12972454  | 142333  | 7 | 0.0068 | 3 | 2 | 1 | 0 | 1 | 0 | 0.0073 | 0.0110 | 0.0128 | 0.0000 | 0.0051 | 0.0000 | 0.0000 |
| CNVR155 | chr17 | 56678966  | 57448926  | chr17:56678966-57448926  | 769961  | 7 | 0.0068 | 1 | 7 | 5 | 0 | 0 | 0 | 0.0024 | 0.0000 | 0.0128 | 0.0943 | 0.0000 | 0.0000 | 0.0014 |
| CNVR156 | chr4  | 57419911  | 57607573  | chr4:57419911-57607573   | 187663  | 7 | 0.0068 | 3 | 2 | 2 | 0 | 0 | 0 | 0.0073 | 0.0110 | 0.0000 | 0.0377 | 0.0000 | 0.0000 | 0.0002 |
| CNVR157 | chr7  | 88779618  | 89043687  | chr7:88779618-89043687   | 264070  | 7 | 0.0068 | 1 | 1 | 4 | 1 | 0 | 0 | 0.0024 | 0.0055 | 0.0513 | 0.0189 | 0.0000 | 0.0000 | 0.0004 |
| CNVR158 | chr1  | 60322989  | 60498181  | chr1:60322989-60498181   | 175193  | 7 | 0.0068 | 6 | 0 | 0 | 1 | 0 | 0 | 0.0146 | 0.0000 | 0.0000 | 0.0189 | 0.0000 | 0.0000 | 0.0001 |
| CNVR159 | chr9  | 14845604  | 15334673  | chr9:14845604-15334673   | 491070  | 7 | 0.0068 | 1 | 0 | 6 | 0 | 0 | 0 | 0.0024 | 0.0000 | 0.0769 | 0.0000 | 0.0000 | 0.0010 | 0.0000 |
| CNVR160 | chr28 | 40249442  | 40411151  | chr28:40249442-40411151  | 148240  | 7 | 0.0068 | 5 | 1 | 0 | 0 | 0 | 0 | 0.0121 | 0.0055 | 0.0128 | 0.0000 | 0.0000 | 0.0000 | 0.0000 |
| CNVR161 | chr10 | 74890609  | 75067935  | chr10:74890609-75067935  | 173727  | 7 | 0.0068 | 3 | 4 | 0 | 0 | 0 | 0 | 0.0073 | 0.0220 | 0.0000 | 0.0000 | 0.0000 | 0.0000 | 0.0001 |
| CNVR162 | chr17 | 26123195  | 26325287  | chr17:26123195-26325287  | 202093  | 7 | 0.0068 | 3 | 4 | 0 | 0 | 0 | 0 | 0.0073 | 0.0220 | 0.0000 | 0.0000 | 0.0000 | 0.0000 | 0.0001 |
| CNVR163 | chr21 | 36563095  | 36798916  | chr21:36563095-36798916  | 235822  | 7 | 0.0068 | 4 | 3 | 0 | 0 | 0 | 0 | 0.0097 | 0.0165 | 0.0000 | 0.0000 | 0.0000 | 0.0000 | 0.0001 |
| CNVR164 | chr3  | 91572483  | 91671546  | chr3:91572483-91671546   | 99064   | 7 | 0.0068 | 7 | 0 | 0 | 0 | 0 | 0 | 0.0170 | 0.0000 | 0.0000 | 0.0000 | 0.0000 | 0.0000 | 0.0000 |
| CNVR165 | chr12 | 74843453  | 75000294  | chr12:74843453-75000294  | 156842  | 7 | 0.0068 | 7 | 0 | 0 | 0 | 0 | 0 | 0.0170 | 0.0000 | 0.0000 | 0.0000 | 0.0000 | 0.0000 | 0.0000 |
| CNVR166 | chr24 | 44428013  | 44670596  | chr24:44428013-44670596  | 242584  | 7 | 0.0068 | 7 | 0 | 0 | 0 | 0 | 0 | 0.0170 | 0.0000 | 0.0000 | 0.0000 | 0.0000 | 0.0000 | 0.0000 |
| CNVR167 | chr7  | 58209310  | 58734465  | chr7:58209310-58734465   | 525156  | 6 | 0.0059 | 0 | 3 | 1 | 2 | 0 | 0 | 0.0000 | 0.0165 | 0.0000 | 0.0000 | 0.0051 | 0.0194 | 0.0001 |
| CNVR168 | chr15 | 5960842   | 5930468   | chr15:5960842-5930468    | 321627  | 6 | 0.0059 | 0 | 1 | 1 | 0 | 3 | 1 | 0.0000 | 0.0055 | 0.0128 | 0.0000 | 0.0154 | 0.0097 | 0.0000 |
| CNVR169 | chr6  | 77939393  | 78208186  | chr6:77939393-78208186   | 114794  | 6 | 0.0059 | 0 | 0 | 0 | 1 | 0 | 0 | 0.0049 | 0.0000 | 0.0000 | 0.0189 | 0.0000 | 0.0097 | 0.0000 |
| CNVR170 | chr5  | 52798883  | 52989560  | chr5:52798883-52989560   | 2996878 | 6 | 0.0059 | 2 | 1 | 0 | 0 | 2 | 1 | 0.0049 | 0.0055 | 0.0000 | 0.0000 | 0.0103 | 0.0097 | 0.0000 |
| CNVR171 | chr25 | 39998687  | 40030012  | chr25:39998687-40030012  | 431326  | 6 | 0.0059 | 0 | 5 | 0 | 0 | 0 | 1 | 0.0000 | 0.0275 | 0.0000 | 0.0000 | 0.0000 | 0.0097 | 0.0001 |
| CNVR172 | chr8  | 33256115  | 33569398  | chr8:33256115-33569398   | 313284  | 6 | 0.0059 | 4 | 1 | 0 | 0 | 0 | 1 | 0.0097 | 0.0055 | 0.0000 | 0.0000 | 0.0000 | 0.0097 | 0.0000 |
| CNVR173 | chr12 | 48483981  | 48715730  | chr12:48483981-48715730  | 231750  | 6 | 0.0059 | 4 | 1 | 0 | 0 | 0 | 1 | 0.0097 | 0.0055 | 0.0000 | 0.0000 | 0.0000 | 0.0097 | 0.0000 |
| CNVR174 | chr14 | 72523575  | 72603732  | chr14:72523575-72603732  | 80158   | 6 | 0.0059 | 5 | 0 | 0 | 0 | 0 | 1 | 0.0121 | 0.0000 | 0.0000 | 0.0000 | 0.0000 | 0.0097 | 0.0000 |
| CNVR175 | chr29 | 12359291  | 12983191  | chr29:12359291-12983191  | 623901  | 6 | 0.0059 | 0 | 0 | 0 | 0 | 6 | 0 | 0.0000 | 0.0000 | 0.0000 | 0.0000 | 0.0308 | 0.0000 | 0.0002 |
| CNVR176 | chr28 | 39127     | 296360    | chr28:39127-296360       | 257234  | 6 | 0.0059 | 3 | 0 | 0 | 0 | 3 | 0 | 0.0073 | 0.0000 | 0.0000 | 0.0000 | 0.0154 | 0.0000 | 0.0000 |
| CNVR177 | chr14 | 24477345  | 24710479  | chr14:24477345-24710479  | 233135  | 6 | 0.0059 | 2 | 0 | 0 | 2 | 2 | 0 | 0.0049 | 0.0000 | 0.0000 | 0.0377 | 0.0103 | 0.0000 | 0.0002 |
| CNVR178 | chr6  | 47619997  | 47972852  | chr6:47619997-47972852   | 152856  | 6 | 0.0059 | 1 | 2 | 0 | 1 | 2 | 0 | 0.0024 | 0.0110 | 0.0000 | 0.0189 | 0.0103 | 0.0000 | 0.0001 |
| CNVR179 | chr28 | 16004815  | 16016815  | chr28:16004815-16016815  | 213400  | 6 | 0.0059 | 0 | 4 | 0 | 0 | 2 | 0 | 0.0000 | 0.0220 | 0.0000 | 0.0000 | 0.0103 | 0.0000 | 0.0001 |
| CNVR180 | chr13 | 42947720  | 43077835  | chr13:42947720-43077835  | 128566  | 6 | 0.0059 | 1 | 0 | 0 | 0 | 0 | 0 | 0.0097 | 0.0000 | 0.0000 | 0.0000 | 0.0103 | 0.0000 | 0.0000 |
| CNVR181 | chr24 | 60953858  | 62183185  | chr24:60953858-62183185  | 1293328 | 6 | 0.0059 | 0 | 2 | 3 | 0 | 1 | 0 | 0.     |        |        |        |        |        |        |

|         |       |           |           |                           |        |   |   |        |   |   |   |   |   |   |        |        |        |        |        |        |        |        |
|---------|-------|-----------|-----------|---------------------------|--------|---|---|--------|---|---|---|---|---|---|--------|--------|--------|--------|--------|--------|--------|--------|
| CNVR250 | chr10 | 89474226  | 89635086  | chr10:89474226-89635086   | 160861 | 4 | 0 | 0.0039 | 3 | 0 | 0 | 0 | 0 | 1 | 0.0073 | 0.0000 | 0.0000 | 0.0000 | 0.0000 | 0.0000 | 0.0097 | 0.0000 |
| CNVR251 | chr16 | 8586742   | 9207345   | chr16:8586742-9207345     | 620604 | 4 | 0 | 0.0039 | 3 | 0 | 0 | 0 | 0 | 1 | 0.0073 | 0.0000 | 0.0000 | 0.0000 | 0.0000 | 0.0000 | 0.0097 | 0.0000 |
| CNVR252 | chr3  | 15985626  | 16120558  | chr3:15985626-16120558    | 134933 | 4 | 0 | 0.0039 | 3 | 0 | 0 | 0 | 4 | 0 | 0.0000 | 0.0000 | 0.0000 | 0.0000 | 0.0000 | 0.0205 | 0.0000 | 0.0001 |
| CNVR253 | chr4  | 87929750  | 88262844  | chr4:87929750-88262844    | 333095 | 4 | 0 | 0.0039 | 0 | 0 | 0 | 0 | 4 | 0 | 0.0000 | 0.0000 | 0.0000 | 0.0000 | 0.0000 | 0.0205 | 0.0000 | 0.0001 |
| CNVR254 | chr5  | 101637673 | 102007184 | chr5:101637673-102007184  | 369512 | 4 | 0 | 0.0039 | 0 | 0 | 0 | 0 | 4 | 0 | 0.0000 | 0.0000 | 0.0000 | 0.0000 | 0.0000 | 0.0205 | 0.0000 | 0.0001 |
| CNVR255 | chr18 | 8706364   | 8798129   | chr18:8706364-8798129     | 91766  | 4 | 0 | 0.0039 | 0 | 1 | 0 | 0 | 3 | 0 | 0.0000 | 0.0000 | 0.0000 | 0.0000 | 0.0000 | 0.0154 | 0.0000 | 0.0000 |
| CNVR256 | chr19 | 735092    | 741103    | chr19:735092-741103       | 506012 | 4 | 0 | 0.0039 | 0 | 1 | 0 | 0 | 3 | 0 | 0.0000 | 0.0055 | 0.0000 | 0.0000 | 0.0000 | 0.0154 | 0.0000 | 0.0000 |
| CNVR257 | chr7  | 90025385  | 90322669  | chr7:90025385-90322669    | 297285 | 4 | 0 | 0.0039 | 0 | 1 | 1 | 0 | 2 | 0 | 0.0000 | 0.0055 | 0.0128 | 0.0000 | 0.0000 | 0.0103 | 0.0000 | 0.0000 |
| CNVR258 | chr5  | 27333941  | 27712849  | chr5:27333941-27712849    | 378909 | 4 | 0 | 0.0039 | 0 | 2 | 0 | 0 | 2 | 0 | 0.0000 | 0.0110 | 0.0000 | 0.0000 | 0.0000 | 0.0103 | 0.0000 | 0.0000 |
| CNVR259 | chr5  | 115164525 | 115600990 | chr5:115164525-115600990  | 436466 | 4 | 0 | 0.0039 | 0 | 2 | 0 | 0 | 2 | 0 | 0.0000 | 0.0110 | 0.0000 | 0.0000 | 0.0000 | 0.0103 | 0.0000 | 0.0000 |
| CNVR260 | chr23 | 22922222  | 23122307  | chr23:22922222-23122307   | 200086 | 4 | 0 | 0.0039 | 0 | 2 | 0 | 0 | 2 | 0 | 0.0000 | 0.0110 | 0.0000 | 0.0000 | 0.0000 | 0.0103 | 0.0000 | 0.0000 |
| CNVR261 | chr21 | 29862147  | 30105662  | chr21:29862147-30105662   | 243516 | 4 | 0 | 0.0039 | 1 | 1 | 0 | 0 | 2 | 0 | 0.0024 | 0.0055 | 0.0000 | 0.0000 | 0.0000 | 0.0103 | 0.0000 | 0.0000 |
| CNVR262 | chr27 | 38760409  | 39014362  | chr27:38760409-39014362   | 253954 | 4 | 0 | 0.0039 | 1 | 1 | 0 | 0 | 2 | 0 | 0.0024 | 0.0055 | 0.0000 | 0.0000 | 0.0000 | 0.0103 | 0.0000 | 0.0000 |
| CNVR263 | chr6  | 101920286 | 102038238 | chr6:101920286-102038238  | 117953 | 4 | 0 | 0.0039 | 1 | 0 | 1 | 1 | 0 | 0 | 0.0024 | 0.0000 | 0.0128 | 0.0189 | 0.0189 | 0.0051 | 0.0000 | 0.0001 |
| CNVR264 | chr12 | 5972595   | 6203570   | chr12:5972595-6203570     | 230976 | 4 | 0 | 0.0039 | 2 | 0 | 0 | 1 | 1 | 0 | 0.0049 | 0.0000 | 0.0000 | 0.0189 | 0.0189 | 0.0051 | 0.0000 | 0.0001 |
| CNVR265 | chr4  | 51294352  | 51399600  | chr4:51294352-51399600    | 105249 | 4 | 0 | 0.0039 | 0 | 2 | 1 | 0 | 1 | 0 | 0.0000 | 0.0110 | 0.0128 | 0.0000 | 0.0000 | 0.0051 | 0.0000 | 0.0000 |
| CNVR266 | chr5  | 84623978  | 85109455  | chr5:84623978-85109455    | 285968 | 4 | 0 | 0.0039 | 0 | 2 | 1 | 0 | 1 | 0 | 0.0000 | 0.0110 | 0.0128 | 0.0000 | 0.0000 | 0.0051 | 0.0000 | 0.0000 |
| CNVR267 | chr2  | 54249365  | 54319168  | chr2:54249365-54319168    | 69804  | 4 | 0 | 0.0039 | 2 | 0 | 0 | 1 | 0 | 1 | 0.0049 | 0.0000 | 0.0128 | 0.0000 | 0.0000 | 0.0051 | 0.0000 | 0.0000 |
| CNVR268 | chr6  | 48768938  | 48997271  | chr6:48768938-48997271    | 228334 | 4 | 0 | 0.0039 | 0 | 3 | 0 | 0 | 1 | 0 | 0.0049 | 0.0165 | 0.0000 | 0.0000 | 0.0000 | 0.0051 | 0.0000 | 0.0000 |
| CNVR269 | chr12 | 24715792  | 24898074  | chr12:24715792-24898074   | 182283 | 4 | 0 | 0.0039 | 2 | 1 | 0 | 0 | 1 | 0 | 0.0049 | 0.0055 | 0.0000 | 0.0000 | 0.0000 | 0.0051 | 0.0000 | 0.0000 |
| CNVR270 | chr14 | 39763022  | 39897819  | chr14:39763022-39897819   | 134798 | 4 | 0 | 0.0039 | 2 | 1 | 0 | 0 | 1 | 0 | 0.0049 | 0.0055 | 0.0000 | 0.0000 | 0.0000 | 0.0051 | 0.0000 | 0.0000 |
| CNVR271 | chr10 | 6898042   | 7035158   | chr10:6898042-7035158     | 137117 | 4 | 0 | 0.0039 | 1 | 0 | 0 | 0 | 1 | 0 | 0.0073 | 0.0000 | 0.0000 | 0.0000 | 0.0000 | 0.0051 | 0.0000 | 0.0000 |
| CNVR272 | chr6  | 49741902  | 49823417  | chr6:49741902-49823417    | 81516  | 4 | 0 | 0.0039 | 1 | 0 | 2 | 1 | 0 | 0 | 0.0024 | 0.0000 | 0.0256 | 0.0189 | 0.0000 | 0.0000 | 0.0000 | 0.0001 |
| CNVR273 | chr26 | 39237952  | 39311419  | chr26:39237952-39311419   | 76168  | 4 | 0 | 0.0039 | 1 | 2 | 0 | 0 | 1 | 0 | 0.0024 | 0.0110 | 0.0000 | 0.0189 | 0.0000 | 0.0000 | 0.0000 | 0.0001 |
| CNVR274 | chr12 | 45383698  | 45896052  | chr12:45383698-45896052   | 512355 | 4 | 0 | 0.0039 | 2 | 1 | 0 | 1 | 0 | 0 | 0.0049 | 0.0055 | 0.0000 | 0.0189 | 0.0000 | 0.0000 | 0.0000 | 0.0001 |
| CNVR275 | chr6  | 86080909  | 86209708  | chr6:86080909-86209708    | 126800 | 4 | 0 | 0.0039 | 1 | 0 | 3 | 0 | 0 | 0 | 0.0024 | 0.0000 | 0.0256 | 0.0000 | 0.0000 | 0.0000 | 0.0000 | 0.0002 |
| CNVR276 | chr19 | 47379297  | 47511441  | chr19:47379297-47511441   | 132145 | 4 | 0 | 0.0039 | 0 | 1 | 0 | 0 | 0 | 0 | 0.0000 | 0.0110 | 0.0256 | 0.0000 | 0.0000 | 0.0000 | 0.0000 | 0.0001 |
| CNVR277 | chr4  | 36633924  | 36835479  | chr4:36633924-36835479    | 201556 | 4 | 0 | 0.0039 | 1 | 1 | 2 | 0 | 0 | 0 | 0.0024 | 0.0055 | 0.0256 | 0.0000 | 0.0000 | 0.0000 | 0.0000 | 0.0001 |
| CNVR278 | chr8  | 19013483  | 19296598  | chr8:19013483-19296598    | 283116 | 4 | 0 | 0.0039 | 1 | 1 | 2 | 0 | 0 | 0 | 0.0024 | 0.0055 | 0.0256 | 0.0000 | 0.0000 | 0.0000 | 0.0000 | 0.0001 |
| CNVR279 | chr4  | 92205915  | 92349001  | chr4:92205915-92349001    | 143087 | 4 | 0 | 0.0039 | 2 | 0 | 0 | 0 | 0 | 0 | 0.0049 | 0.0000 | 0.0256 | 0.0000 | 0.0000 | 0.0000 | 0.0000 | 0.0001 |
| CNVR280 | chr10 | 11471349  | 11582267  | chr10:11471349-11582267   | 110919 | 4 | 0 | 0.0039 | 0 | 3 | 1 | 0 | 0 | 0 | 0.0000 | 0.0165 | 0.0128 | 0.0000 | 0.0000 | 0.0000 | 0.0000 | 0.0001 |
| CNVR281 | chr21 | 4686838   | 4912227   | chr21:4686838-4912227     | 225390 | 4 | 0 | 0.0039 | 0 | 3 | 1 | 0 | 0 | 0 | 0.0000 | 0.0165 | 0.0128 | 0.0000 | 0.0000 | 0.0000 | 0.0000 | 0.0001 |
| CNVR282 | chr2  | 78934355  | 79054993  | chr2:78934355-79054993    | 120639 | 4 | 0 | 0.0039 | 1 | 2 | 1 | 0 | 0 | 0 | 0.0024 | 0.0110 | 0.0128 | 0.0000 | 0.0000 | 0.0000 | 0.0000 | 0.0000 |
| CNVR283 | chr2  | 69487940  | 69709232  | chr2:69487940-69709232    | 221293 | 4 | 0 | 0.0039 | 3 | 0 | 1 | 0 | 0 | 0 | 0.0073 | 0.0000 | 0.0128 | 0.0000 | 0.0000 | 0.0000 | 0.0000 | 0.0000 |
| CNVR284 | chr17 | 38453012  | 38660495  | chr17:38453012-38660495   | 207484 | 4 | 0 | 0.0039 | 3 | 0 | 1 | 0 | 0 | 0 | 0.0073 | 0.0000 | 0.0128 | 0.0000 | 0.0000 | 0.0000 | 0.0000 | 0.0000 |
| CNVR285 | chr12 | 51846124  | 5192054   | chr12:51846124-5192054    | 227831 | 4 | 0 | 0.0039 | 3 | 0 | 1 | 0 | 0 | 0 | 0.0073 | 0.0000 | 0.0128 | 0.0000 | 0.0000 | 0.0000 | 0.0000 | 0.0000 |
| CNVR286 | chr11 | 102075796 | 102218431 | chr11:102075796-102218431 | 142636 | 4 | 0 | 0.0039 | 0 | 4 | 0 | 0 | 0 | 0 | 0.0000 | 0.0220 | 0.0000 | 0.0000 | 0.0000 | 0.0000 | 0.0000 | 0.0001 |
| CNVR287 | chr13 | 53499132  | 53941826  | chr13:53499132-53941826   | 442695 | 4 | 0 | 0.0039 | 0 | 4 | 0 | 0 | 0 | 0 | 0.0000 | 0.0220 | 0.0000 | 0.0000 | 0.0000 | 0.0000 | 0.0000 | 0.0001 |
| CNVR288 | chr10 | 19055481  | 19292195  | chr10:19055481-19292195   | 236715 | 4 | 0 | 0.0039 | 3 | 1 | 0 | 0 | 0 | 0 | 0.0073 | 0.0055 | 0.0000 | 0.0000 | 0.0000 | 0.0000 | 0.0000 | 0.0000 |
| CNVR289 | chr12 | 59649639  | 59765278  | chr12:59649639-59765278   | 115640 | 4 | 0 | 0.0039 | 3 | 1 | 0 | 0 | 0 | 0 | 0.0073 | 0.0055 | 0.0000 | 0.0000 | 0.0000 | 0.0000 | 0.0000 | 0.0000 |
| CNVR290 | chr19 | 46093124  | 46359942  | chr19:46093124-46359942   | 266819 | 4 | 0 | 0.0039 | 3 | 1 | 0 | 0 | 0 | 0 | 0.0073 | 0.0055 | 0.0000 | 0.0000 | 0.0000 | 0.0000 | 0.0000 | 0.0000 |
| CNVR291 | chr1  | 84242981  | 84389377  | chr1:84242981-84389377    | 146397 | 4 | 0 | 0.0039 | 4 | 0 | 0 | 0 | 0 | 0 | 0.0097 | 0.0000 | 0.0000 | 0.0000 | 0.0000 | 0.0000 | 0.0000 | 0.0000 |
| CNVR292 | chr5  | 23429306  | 23524159  | chr5:23429306-23524159    | 94854  | 4 | 0 | 0.0039 | 4 | 0 | 0 | 0 | 0 | 0 | 0.0097 | 0.0000 | 0.0000 | 0.0000 | 0.0000 | 0.0000 | 0.0000 | 0.0000 |
| CNVR293 | chr6  | 11173170  | 111320579 | chr6:11173170-111320579   | 147410 | 4 | 0 | 0.0039 | 4 | 0 | 0 | 0 | 0 | 0 | 0.0097 | 0.0000 | 0.0000 | 0.0000 | 0.0000 | 0.0000 | 0.0000 | 0.0000 |
| CNVR294 | chr12 | 23045219  | 23223385  | chr12:23045219-23223385   | 178167 | 4 | 0 | 0.0039 | 4 | 0 | 0 | 0 | 0 | 0 | 0.0097 | 0.0000 | 0.0000 | 0.0000 | 0.0000 | 0.0000 | 0.0000 | 0.0000 |
| CNVR295 | chr14 | 27997754  | 28241087  | chr14:27997754-28241087   | 241334 | 4 | 0 | 0.0039 | 4 | 0 | 0 | 0 | 0 | 0 | 0.0097 | 0.0000 | 0.0000 | 0.0000 | 0.0000 | 0.0000 | 0.0000 | 0.0000 |
| CNVR296 | chr16 | 34261365  | 34856843  | chr16:34261365-34856843   | 595479 | 4 | 0 | 0.0039 | 4 | 0 | 0 | 0 | 0 | 0 | 0.0097 | 0.0000 | 0.0000 | 0.0000 | 0.0000 | 0.0000 | 0.0000 | 0.0000 |
| CNVR297 | chr2  | 40885662  | 40988733  | chr2:40885662-40988733    | 103072 | 4 | 0 | 0.0039 | 4 | 0 | 0 | 0 | 0 | 0 | 0.0097 | 0.0000 | 0.0000 | 0.0000 | 0.0000 | 0.0000 | 0.0000 | 0.0000 |
| CNVR298 | chr24 | 16018508  | 16178857  | chr24:16018508-16178857   | 160350 | 3 | 0 | 0.0029 | 0 | 0 | 0 | 1 | 2 | 0 | 0.0000 | 0.0000 | 0.0000 | 0.0000 | 0.0000 | 0.0051 | 0.0194 | 0.0001 |
| CNVR299 | chr18 | 65210864  | 65486835  | chr18:65210864-65486835   | 275972 | 3 | 0 | 0.0029 | 0 | 0 | 0 | 1 | 1 | 0 | 0.0000 | 0.0000 | 0.0128 | 0.0000 | 0.0000 | 0.0051 | 0.0097 | 0.0000 |
| CNVR300 | chr29 | 47226927  | 47555144  | chr29:47226927-47555144   | 328218 | 3 | 0 | 0.0029 | 0 | 0 | 1 | 0 | 1 | 0 | 0.0000 | 0.0000 | 0.0128 | 0.0000 | 0.0000 | 0.0051 | 0.0097 | 0.0000 |
| CNVR301 | chr12 | 314232    | 540846    | chr12:314232-540846       | 226615 | 3 | 0 | 0.0029 | 0 | 1 | 0 | 0 | 1 | 1 | 0.0000 | 0.0055 | 0.0000 | 0.0000 | 0.0000 | 0.0051 | 0.0097 | 0.0000 |
| CNVR302 | chr29 | 39451438  | 39649276  | chr29:39451438-39649276   | 197839 | 3 | 0 | 0.0029 | 1 | 0 | 1 | 0 | 1 | 0 | 0.0024 | 0.0000 | 0.0000 | 0.0189 | 0.0000 | 0.0097 | 0.0001 | 0.0000 |
| CNVR303 | chr7  | 3252633   | 32696561  | chr7:3252633-32696561</   |        |   |   |        |   |   |   |   |   |   |        |        |        |        |        |        |        |        |

|         |       |           |           |                          |         |   |        |   |   |   |   |   |   |        |        |        |        |        |        |        |        |
|---------|-------|-----------|-----------|--------------------------|---------|---|--------|---|---|---|---|---|---|--------|--------|--------|--------|--------|--------|--------|--------|
| CNVR376 | chr28 | 33750370  | 33876380  | chr28:33750370-33876380  | 126011  | 2 | 0.0020 | 0 | 0 | 0 | 0 | 0 | 2 | 0.0000 | 0.0000 | 0.0000 | 0.0000 | 0.0000 | 0.0194 | 0.0001 |        |
| CNVR377 | chr1  | 17210656  | 17415477  | chr1:17210656-17415477   | 204822  | 2 | 0.0020 | 0 | 0 | 0 | 0 | 1 | 1 | 0.0000 | 0.0000 | 0.0000 | 0.0000 | 0.0000 | 0.0051 | 0.0097 | 0.0000 |
| CNVR378 | chr7  | 25661312  | 25863507  | chr7:25661312-25863507   | 202196  | 2 | 0.0020 | 0 | 0 | 0 | 0 | 1 | 1 | 0.0000 | 0.0000 | 0.0000 | 0.0000 | 0.0000 | 0.0051 | 0.0097 | 0.0000 |
| CNVR379 | chr8  | 32560844  | 32632725  | chr8:32560844-32632725   | 71882   | 2 | 0.0020 | 0 | 0 | 0 | 0 | 1 | 1 | 0.0000 | 0.0000 | 0.0000 | 0.0000 | 0.0000 | 0.0051 | 0.0097 | 0.0000 |
| CNVR380 | chr12 | 15136272  | 15670432  | chr12:15136272-15670432  | 534161  | 2 | 0.0020 | 0 | 0 | 0 | 0 | 1 | 1 | 0.0000 | 0.0000 | 0.0000 | 0.0000 | 0.0000 | 0.0051 | 0.0097 | 0.0000 |
| CNVR381 | chr19 | 55170877  | 55248876  | chr19:55170877-55248876  | 71880   | 2 | 0.0020 | 0 | 0 | 0 | 0 | 1 | 1 | 0.0000 | 0.0000 | 0.0000 | 0.0000 | 0.0000 | 0.0051 | 0.0097 | 0.0000 |
| CNVR382 | chr29 | 20677731  | 20902124  | chr29:20677731-20902124  | 224394  | 2 | 0.0020 | 0 | 0 | 0 | 0 | 1 | 1 | 0.0000 | 0.0000 | 0.0000 | 0.0000 | 0.0000 | 0.0051 | 0.0097 | 0.0000 |
| CNVR383 | chr16 | 14397294  | 14685206  | chr16:14397294-14685206  | 287913  | 2 | 0.0020 | 0 | 0 | 0 | 1 | 0 | 1 | 0.0000 | 0.0000 | 0.0000 | 0.0000 | 0.0189 | 0.0000 | 0.0097 | 0.0001 |
| CNVR384 | chr3  | 42725005  | 42908776  | chr3:42725005-42908776   | 183772  | 2 | 0.0020 | 0 | 0 | 0 | 0 | 1 | 0 | 0.0000 | 0.0000 | 0.0128 | 0.0000 | 0.0000 | 0.0000 | 0.0097 | 0.0000 |
| CNVR385 | chr10 | 14701696  | 14840022  | chr10:14701696-14840022  | 138327  | 2 | 0.0020 | 0 | 0 | 0 | 0 | 1 | 0 | 0.0000 | 0.0000 | 0.0128 | 0.0000 | 0.0000 | 0.0000 | 0.0097 | 0.0000 |
| CNVR386 | chr19 | 55704333  | 55722533  | chr19:55704333-55722533  | 67921   | 2 | 0.0020 | 0 | 0 | 1 | 0 | 0 | 1 | 0.0000 | 0.0000 | 0.0128 | 0.0000 | 0.0000 | 0.0000 | 0.0097 | 0.0000 |
| CNVR387 | chr8  | 35663210  | 37174118  | chr8:35663210-37174118   | 1510909 | 2 | 0.0020 | 0 | 1 | 0 | 0 | 0 | 1 | 0.0000 | 0.0055 | 0.0000 | 0.0000 | 0.0000 | 0.0000 | 0.0097 | 0.0000 |
| CNVR388 | chr17 | 47782334  | 48381508  | chr17:47782334-48381508  | 599175  | 2 | 0.0020 | 0 | 1 | 0 | 0 | 0 | 1 | 0.0000 | 0.0055 | 0.0000 | 0.0000 | 0.0000 | 0.0000 | 0.0097 | 0.0000 |
| CNVR389 | chr2  | 77689797  | 77936509  | chr2:77689797-77936509   | 246713  | 2 | 0.0020 | 1 | 0 | 0 | 0 | 0 | 1 | 0.0024 | 0.0000 | 0.0000 | 0.0000 | 0.0000 | 0.0000 | 0.0097 | 0.0000 |
| CNVR390 | chr3  | 49354256  | 49553242  | chr3:49354256-49553242   | 198987  | 2 | 0.0020 | 1 | 0 | 0 | 0 | 0 | 1 | 0.0024 | 0.0000 | 0.0000 | 0.0000 | 0.0000 | 0.0000 | 0.0097 | 0.0000 |
| CNVR391 | chr3  | 91757813  | 92185077  | chr3:91757813-92185077   | 427265  | 2 | 0.0020 | 1 | 0 | 0 | 0 | 0 | 1 | 0.0024 | 0.0000 | 0.0000 | 0.0000 | 0.0000 | 0.0000 | 0.0097 | 0.0000 |
| CNVR392 | chr5  | 75087531  | 75300686  | chr5:75087531-75300686   | 211056  | 2 | 0.0020 | 1 | 0 | 0 | 0 | 0 | 1 | 0.0024 | 0.0000 | 0.0000 | 0.0000 | 0.0000 | 0.0000 | 0.0097 | 0.0000 |
| CNVR393 | chr6  | 10211361  | 10541586  | chr6:10211361-10541586   | 330226  | 2 | 0.0020 | 1 | 0 | 0 | 0 | 0 | 1 | 0.0024 | 0.0000 | 0.0000 | 0.0000 | 0.0000 | 0.0000 | 0.0097 | 0.0000 |
| CNVR394 | chr9  | 65893025  | 66055239  | chr9:65893025-66055239   | 162215  | 2 | 0.0020 | 1 | 0 | 0 | 0 | 0 | 1 | 0.0024 | 0.0000 | 0.0000 | 0.0000 | 0.0000 | 0.0000 | 0.0097 | 0.0000 |
| CNVR395 | chr13 | 18059828  | 18184118  | chr13:18059828-18184118  | 124291  | 2 | 0.0020 | 1 | 0 | 0 | 0 | 0 | 1 | 0.0024 | 0.0000 | 0.0000 | 0.0000 | 0.0000 | 0.0000 | 0.0097 | 0.0000 |
| CNVR396 | chr17 | 48992554  | 50143730  | chr17:48992554-50143730  | 1151177 | 2 | 0.0020 | 1 | 0 | 0 | 0 | 0 | 1 | 0.0024 | 0.0000 | 0.0000 | 0.0000 | 0.0000 | 0.0000 | 0.0097 | 0.0000 |
| CNVR397 | chr2  | 2669806   | 27916302  | chr2:2669806-27916302    | 121825  | 2 | 0.0020 | 0 | 0 | 0 | 0 | 2 | 0 | 0.0000 | 0.0000 | 0.0000 | 0.0000 | 0.0000 | 0.0103 | 0.0000 | 0.0000 |
| CNVR398 | chr4  | 1133055   | 1438909   | chr4:1133055-1438909     | 305855  | 2 | 0.0020 | 0 | 0 | 0 | 0 | 2 | 0 | 0.0000 | 0.0000 | 0.0000 | 0.0000 | 0.0000 | 0.0103 | 0.0000 | 0.0000 |
| CNVR399 | chr9  | 84026367  | 84168050  | chr9:84026367-84168050   | 141684  | 2 | 0.0020 | 0 | 0 | 0 | 0 | 2 | 0 | 0.0000 | 0.0000 | 0.0000 | 0.0000 | 0.0000 | 0.0103 | 0.0000 | 0.0000 |
| CNVR400 | chr12 | 48086881  | 48240808  | chr12:48086881-48240808  | 153928  | 2 | 0.0020 | 0 | 0 | 0 | 0 | 2 | 0 | 0.0000 | 0.0000 | 0.0000 | 0.0000 | 0.0000 | 0.0103 | 0.0000 | 0.0000 |
| CNVR401 | chr12 | 59280584  | 59280584  | chr12:59280584-59280584  | 344253  | 2 | 0.0020 | 0 | 0 | 0 | 0 | 2 | 0 | 0.0000 | 0.0000 | 0.0000 | 0.0000 | 0.0000 | 0.0103 | 0.0000 | 0.0000 |
| CNVR402 | chr15 | 57138471  | 57184124  | chr15:57138471-57184124  | 45654   | 2 | 0.0020 | 0 | 0 | 0 | 0 | 2 | 0 | 0.0000 | 0.0000 | 0.0000 | 0.0000 | 0.0000 | 0.0103 | 0.0000 | 0.0000 |
| CNVR403 | chr16 | 2593308   | 2650100   | chr16:2593308-2650100    | 66793   | 2 | 0.0020 | 0 | 0 | 0 | 0 | 2 | 0 | 0.0000 | 0.0000 | 0.0000 | 0.0000 | 0.0000 | 0.0103 | 0.0000 | 0.0000 |
| CNVR404 | chr17 | 1656773   | 1789018   | chr17:1656773-1789018    | 132246  | 2 | 0.0020 | 0 | 0 | 0 | 0 | 2 | 0 | 0.0000 | 0.0000 | 0.0000 | 0.0000 | 0.0000 | 0.0103 | 0.0000 | 0.0000 |
| CNVR405 | chr19 | 23467961  | 23660587  | chr19:23467961-23660587  | 192627  | 2 | 0.0020 | 0 | 0 | 0 | 0 | 2 | 0 | 0.0000 | 0.0000 | 0.0000 | 0.0000 | 0.0000 | 0.0103 | 0.0000 | 0.0000 |
| CNVR406 | chr21 | 57123881  | 57189534  | chr21:57123881-57189534  | 65654   | 2 | 0.0020 | 0 | 0 | 0 | 0 | 2 | 0 | 0.0000 | 0.0000 | 0.0000 | 0.0000 | 0.0000 | 0.0103 | 0.0000 | 0.0000 |
| CNVR407 | chr23 | 41957169  | 42101312  | chr23:41957169-42101312  | 144144  | 2 | 0.0020 | 0 | 0 | 0 | 0 | 2 | 0 | 0.0000 | 0.0000 | 0.0000 | 0.0000 | 0.0000 | 0.0103 | 0.0000 | 0.0000 |
| CNVR408 | chr24 | 2969509   | 3229712   | chr24:2969509-3229712    | 260204  | 2 | 0.0020 | 0 | 0 | 0 | 0 | 2 | 0 | 0.0000 | 0.0000 | 0.0000 | 0.0000 | 0.0000 | 0.0103 | 0.0000 | 0.0000 |
| CNVR409 | chr25 | 39448969  | 39826136  | chr25:39448969-39826136  | 377168  | 2 | 0.0020 | 0 | 0 | 0 | 0 | 2 | 0 | 0.0000 | 0.0000 | 0.0000 | 0.0000 | 0.0000 | 0.0103 | 0.0000 | 0.0000 |
| CNVR410 | chr28 | 1291282   | 1960609   | chr28:1291282-1960609    | 614728  | 2 | 0.0020 | 0 | 0 | 0 | 0 | 2 | 0 | 0.0000 | 0.0000 | 0.0000 | 0.0000 | 0.0000 | 0.0103 | 0.0000 | 0.0000 |
| CNVR411 | chr12 | 7401498   | 7418487   | chr12:7401498-7418487    | 103990  | 2 | 0.0020 | 0 | 0 | 0 | 1 | 1 | 0 | 0.0024 | 0.0000 | 0.0000 | 0.0000 | 0.0189 | 0.0000 | 0.0001 | 0.0000 |
| CNVR412 | chr8  | 7928615   | 79350102  | chr8:7928615-79350102    | 63288   | 2 | 0.0020 | 0 | 0 | 0 | 1 | 1 | 0 | 0.0000 | 0.0000 | 0.0000 | 0.0000 | 0.0189 | 0.0000 | 0.0001 | 0.0000 |
| CNVR413 | chr27 | 26991656  | 27287058  | chr27:26991656-27287058  | 295403  | 2 | 0.0020 | 0 | 0 | 0 | 1 | 1 | 0 | 0.0000 | 0.0000 | 0.0000 | 0.0000 | 0.0189 | 0.0000 | 0.0001 | 0.0000 |
| CNVR414 | chr3  | 119822951 | 119954357 | chr3:119822951-119954357 | 131407  | 2 | 0.0020 | 0 | 0 | 1 | 0 | 1 | 0 | 0.0000 | 0.0000 | 0.0128 | 0.0000 | 0.0000 | 0.0051 | 0.0000 | 0.0000 |
| CNVR415 | chr7  | 3581367   | 4029290   | chr7:3581367-4029290     | 447924  | 2 | 0.0020 | 0 | 0 | 0 | 0 | 1 | 0 | 0.0000 | 0.0000 | 0.0128 | 0.0000 | 0.0000 | 0.0051 | 0.0000 | 0.0000 |
| CNVR416 | chr14 | 62097501  | 62360121  | chr14:62097501-62360121  | 262621  | 2 | 0.0020 | 0 | 0 | 1 | 0 | 1 | 0 | 0.0000 | 0.0000 | 0.0128 | 0.0000 | 0.0000 | 0.0051 | 0.0000 | 0.0000 |
| CNVR417 | chr15 | 73340784  | 73927930  | chr15:73340784-73927930  | 587147  | 2 | 0.0020 | 0 | 0 | 0 | 1 | 1 | 0 | 0.0000 | 0.0000 | 0.0128 | 0.0000 | 0.0000 | 0.0051 | 0.0000 | 0.0000 |
| CNVR418 | chr3  | 109732251 | 109851137 | chr3:109732251-109851137 | 118887  | 2 | 0.0020 | 0 | 1 | 0 | 0 | 1 | 0 | 0.0000 | 0.0055 | 0.0000 | 0.0000 | 0.0000 | 0.0051 | 0.0000 | 0.0000 |
| CNVR419 | chr6  | 4703293   | 4770730   | chr6:4703293-4770730     | 67438   | 2 | 0.0020 | 0 | 1 | 0 | 0 | 1 | 0 | 0.0000 | 0.0055 | 0.0000 | 0.0000 | 0.0000 | 0.0051 | 0.0000 | 0.0000 |
| CNVR420 | chr7  | 15423801  | 15497158  | chr7:15423801-15497158   | 73358   | 2 | 0.0020 | 0 | 0 | 0 | 0 | 1 | 0 | 0.0000 | 0.0055 | 0.0000 | 0.0000 | 0.0000 | 0.0051 | 0.0000 | 0.0000 |
| CNVR421 | chr9  | 50121735  | 5090134   | chr9:50121735-5090134    | 337300  | 2 | 0.0020 | 0 | 0 | 0 | 1 | 1 | 0 | 0.0000 | 0.0055 | 0.0000 | 0.0000 | 0.0000 | 0.0051 | 0.0000 | 0.0000 |
| CNVR422 | chr13 | 2044451   | 2190267   | chr13:2044451-2190267    | 145817  | 2 | 0.0020 | 0 | 0 | 0 | 0 | 1 | 0 | 0.0000 | 0.0055 | 0.0000 | 0.0000 | 0.0000 | 0.0051 | 0.0000 | 0.0000 |
| CNVR423 | chr18 | 9455551   | 9690202   | chr18:9455551-9690202    | 236652  | 2 | 0.0020 | 0 | 0 | 0 | 1 | 0 | 0 | 0.0000 | 0.0055 | 0.0000 | 0.0000 | 0.0000 | 0.0051 | 0.0000 | 0.0000 |
| CNVR424 | chr18 | 54743018  | 54889434  | chr18:54743018-54889434  | 146417  | 2 | 0.0020 | 0 | 1 | 0 | 0 | 1 | 0 | 0.0000 | 0.0055 | 0.0000 | 0.0000 | 0.0000 | 0.0051 | 0.0000 | 0.0000 |
| CNVR425 | chr27 | 38511685  | 38667101  | chr27:38511685-38667101  | 155417  | 2 | 0.0020 | 0 | 0 | 0 | 1 | 0 | 0 | 0.0000 | 0.0055 | 0.0000 | 0.0000 | 0.0000 | 0.0051 | 0.0000 | 0.0000 |
| CNVR426 | chr28 | 42426843  | 43007895  | chr28:42426843-43007895  | 581053  | 2 | 0.0020 | 0 | 1 | 0 | 0 | 1 | 0 | 0.0000 | 0.0055 | 0.0000 | 0.0000 | 0.0000 | 0.0051 | 0.0000 | 0.0000 |
| CNVR427 | chr2  | 35993258  | 36210898  | chr2:35993258-36210898   | 217641  | 2 | 0.0020 | 1 | 0 | 0 | 0 | 1 | 0 | 0.0024 | 0.0000 | 0.0000 | 0.0000 | 0.0000 | 0.0051 | 0.0000 | 0.0000 |
| CNVR428 | chr7  | 68702875  | 68781064  | chr7:68702875-68781064   | 78190   | 2 | 0.0020 | 1 | 0 | 0 | 0 | 1 | 0 | 0.0024 | 0.0000 | 0.0000 | 0.0000 | 0.0000 | 0.0051 | 0.0000 | 0.0000 |
| CNVR429 | chr8  | 4995390   | 5137151   | chr8:4995390-5137151     | 141762  | 2 | 0.0020 | 1 | 0 | 0 | 0 | 1 | 0 | 0.0024 | 0.0000 | 0.0000 | 0.0000 | 0.0000 | 0.0051 | 0.0000 | 0.0000 |
| CNVR430 | chr10 | 316360    | 560771    | chr10:316360-560771      | 244412  | 2 | 0.0020 | 1 | 0 | 0 | 0 | 1 | 0 | 0.0024 | 0.0000 | 0.0000 | 0.0000 | 0.0000 | 0.0051 | 0      |        |

|         |       |           |           |                           |        |   |        |   |   |   |   |        |        |        |        |        |        |        |        |
|---------|-------|-----------|-----------|---------------------------|--------|---|--------|---|---|---|---|--------|--------|--------|--------|--------|--------|--------|--------|
| CNVR502 | chr6  | 13195696  | 13269173  | chr6:13195696-13269173    | 73478  | 2 | 0.0020 | 2 | 0 | 0 | 0 | 0      | 0.0049 | 0.0000 | 0.0000 | 0.0000 | 0.0000 | 0.0000 | 0.0000 |
| CNVR503 | chr6  | 37898813  | 38091505  | chr6:37898813-38091505    | 192693 | 2 | 0.0020 | 2 | 0 | 0 | 0 | 0      | 0.0049 | 0.0000 | 0.0000 | 0.0000 | 0.0000 | 0.0000 | 0.0000 |
| CNVR504 | chr7  | 17904718  | 18071043  | chr7:17904718-18071043    | 166326 | 2 | 0.0020 | 2 | 0 | 0 | 0 | 0      | 0.0049 | 0.0000 | 0.0000 | 0.0000 | 0.0000 | 0.0000 | 0.0000 |
| CNVR505 | chr7  | 24196364  | 24274064  | chr7:24196364-24274064    | 77701  | 2 | 0.0020 | 2 | 0 | 0 | 0 | 0      | 0.0049 | 0.0000 | 0.0000 | 0.0000 | 0.0000 | 0.0000 | 0.0000 |
| CNVR506 | chr7  | 75363183  | 75492245  | chr7:75363183-75492245    | 129063 | 2 | 0.0020 | 2 | 0 | 0 | 0 | 0      | 0.0049 | 0.0000 | 0.0000 | 0.0000 | 0.0000 | 0.0000 | 0.0000 |
| CNVR507 | chr10 | 88946391  | 89011933  | chr10:88946391-89011933   | 65543  | 2 | 0.0020 | 2 | 0 | 0 | 0 | 0      | 0.0049 | 0.0000 | 0.0000 | 0.0000 | 0.0000 | 0.0000 | 0.0000 |
| CNVR508 | chr10 | 100710108 | 100856764 | chr10:100710108-100856764 | 146657 | 2 | 0.0020 | 2 | 0 | 0 | 0 | 0      | 0.0049 | 0.0000 | 0.0000 | 0.0000 | 0.0000 | 0.0000 | 0.0000 |
| CNVR509 | chr12 | 29553842  | 29323487  | chr12:29553842-29323487   | 269646 | 2 | 0.0020 | 2 | 0 | 0 | 0 | 0      | 0.0049 | 0.0000 | 0.0000 | 0.0000 | 0.0000 | 0.0000 | 0.0000 |
| CNVR510 | chr12 | 62909764  | 62977761  | chr12:62909764-62977761   | 67998  | 2 | 0.0020 | 2 | 0 | 0 | 0 | 0      | 0.0049 | 0.0000 | 0.0000 | 0.0000 | 0.0000 | 0.0000 | 0.0000 |
| CNVR511 | chr13 | 16583614  | 16678458  | chr13:16583614-16678458   | 94845  | 2 | 0.0020 | 2 | 0 | 0 | 0 | 0      | 0.0049 | 0.0000 | 0.0000 | 0.0000 | 0.0000 | 0.0000 | 0.0000 |
| CNVR512 | chr14 | 8630351   | 8780447   | chr14:8630351-8780447     | 150097 | 2 | 0.0020 | 2 | 0 | 0 | 0 | 0      | 0.0049 | 0.0000 | 0.0000 | 0.0000 | 0.0000 | 0.0000 | 0.0000 |
| CNVR513 | chr14 | 64509716  | 64708314  | chr14:64509716-64708314   | 198599 | 2 | 0.0020 | 2 | 0 | 0 | 0 | 0      | 0.0049 | 0.0000 | 0.0000 | 0.0000 | 0.0000 | 0.0000 | 0.0000 |
| CNVR514 | chr14 | 70973809  | 71038715  | chr14:70973809-71038715   | 64907  | 2 | 0.0020 | 2 | 0 | 0 | 0 | 0      | 0.0049 | 0.0000 | 0.0000 | 0.0000 | 0.0000 | 0.0000 | 0.0000 |
| CNVR515 | chr15 | 68508002  | 68596370  | chr15:68508002-68596370   | 88369  | 2 | 0.0020 | 2 | 0 | 0 | 0 | 0      | 0.0049 | 0.0000 | 0.0000 | 0.0000 | 0.0000 | 0.0000 | 0.0000 |
| CNVR516 | chr16 | 28987486  | 29263185  | chr16:28987486-29263185   | 275700 | 2 | 0.0020 | 2 | 0 | 0 | 0 | 0      | 0.0049 | 0.0000 | 0.0000 | 0.0000 | 0.0000 | 0.0000 | 0.0000 |
| CNVR517 | chr16 | 66515022  | 66662197  | chr16:66515022-66662197   | 147176 | 2 | 0.0020 | 2 | 0 | 0 | 0 | 0      | 0.0049 | 0.0000 | 0.0000 | 0.0000 | 0.0000 | 0.0000 | 0.0000 |
| CNVR518 | chr21 | 16175496  | 16336056  | chr21:16175496-16336056   | 162511 | 2 | 0.0020 | 2 | 0 | 0 | 0 | 0      | 0.0049 | 0.0000 | 0.0000 | 0.0000 | 0.0000 | 0.0000 | 0.0000 |
| CNVR519 | chr22 | 25265396  | 25939055  | chr22:25265396-25939055   | 673660 | 2 | 0.0020 | 2 | 0 | 0 | 0 | 0      | 0.0049 | 0.0000 | 0.0000 | 0.0000 | 0.0000 | 0.0000 | 0.0000 |
| CNVR520 | chr23 | 8342738   | 8578433   | chr23:8342738-8578433     | 235696 | 2 | 0.0020 | 2 | 0 | 0 | 0 | 0      | 0.0049 | 0.0000 | 0.0000 | 0.0000 | 0.0000 | 0.0000 | 0.0000 |
| CNVR521 | chr23 | 28418703  | 28691044  | chr23:28418703-28691044   | 272342 | 2 | 0.0020 | 2 | 0 | 0 | 0 | 0      | 0.0049 | 0.0000 | 0.0000 | 0.0000 | 0.0000 | 0.0000 | 0.0000 |
| CNVR522 | chr24 | 8798850   | 9077172   | chr24:8798850-9077172     | 278323 | 2 | 0.0020 | 2 | 0 | 0 | 0 | 0      | 0.0049 | 0.0000 | 0.0000 | 0.0000 | 0.0000 | 0.0000 | 0.0000 |
| CNVR523 | chr24 | 20260350  | 20444877  | chr24:20260350-20444877   | 184528 | 2 | 0.0020 | 2 | 0 | 0 | 0 | 0      | 0.0049 | 0.0000 | 0.0000 | 0.0000 | 0.0000 | 0.0000 | 0.0000 |
| CNVR524 | chr26 | 11211500  | 11440790  | chr26:11211500-11440790   | 229291 | 2 | 0.0020 | 2 | 0 | 0 | 0 | 0      | 0.0049 | 0.0000 | 0.0000 | 0.0000 | 0.0000 | 0.0000 | 0.0000 |
| CNVR525 | chr28 | 11290377  | 11451830  | chr28:11290377-11451830   | 161454 | 2 | 0.0020 | 2 | 0 | 0 | 0 | 0      | 0.0049 | 0.0000 | 0.0000 | 0.0000 | 0.0000 | 0.0000 | 0.0000 |
| CNVR526 | chr29 | 21159502  | 21274342  | chr29:21159502-21274342   | 114841 | 2 | 0.0020 | 2 | 0 | 0 | 0 | 0      | 0.0049 | 0.0000 | 0.0000 | 0.0000 | 0.0000 | 0.0000 | 0.0000 |
| CNVR527 | chr1  | 44700257  | 44783046  | chr1:44700257-44783046    | 82790  | 1 | 0.0010 | 0 | 0 | 0 | 1 | 0.0000 | 0.0000 | 0.0000 | 0.0000 | 0.0000 | 0.0000 | 0.0000 | 0.0000 |
| CNVR528 | chr2  | 35489975  | 3559675   | chr2:35489975-3559675     | 105701 | 1 | 0.0010 | 0 | 0 | 0 | 0 | 1      | 0.0000 | 0.0000 | 0.0000 | 0.0000 | 0.0000 | 0.0000 | 0.0000 |
| CNVR529 | chr2  | 35787371  | 35845488  | chr2:35787371-35845488    | 61758  | 1 | 0.0010 | 0 | 0 | 0 | 0 | 1      | 0.0000 | 0.0000 | 0.0000 | 0.0000 | 0.0000 | 0.0000 | 0.0000 |
| CNVR530 | chr2  | 67994461  | 68240561  | chr2:67994461-68240561    | 246101 | 1 | 0.0010 | 0 | 0 | 0 | 0 | 1      | 0.0000 | 0.0000 | 0.0000 | 0.0000 | 0.0000 | 0.0000 | 0.0000 |
| CNVR531 | chr2  | 74739034  | 74820042  | chr2:74739034-74820042    | 81009  | 1 | 0.0010 | 0 | 0 | 0 | 1 | 0.0000 | 0.0000 | 0.0000 | 0.0000 | 0.0000 | 0.0000 | 0.0000 | 0.0000 |
| CNVR532 | chr2  | 82404137  | 82549850  | chr2:82404137-82549850    | 145714 | 1 | 0.0010 | 0 | 0 | 0 | 1 | 0.0000 | 0.0000 | 0.0000 | 0.0000 | 0.0000 | 0.0000 | 0.0000 | 0.0000 |
| CNVR533 | chr3  | 85722216  | 85856499  | chr3:85722216-85856499    | 134284 | 1 | 0.0010 | 0 | 0 | 0 | 1 | 0.0000 | 0.0000 | 0.0000 | 0.0000 | 0.0000 | 0.0000 | 0.0000 | 0.0000 |
| CNVR534 | chr4  | 71733634  | 71845403  | chr4:71733634-71845403    | 111770 | 1 | 0.0010 | 0 | 0 | 0 | 1 | 0.0000 | 0.0000 | 0.0000 | 0.0000 | 0.0000 | 0.0000 | 0.0000 | 0.0000 |
| CNVR535 | chr4  | 85968381  | 86097905  | chr4:85968381-86097905    | 129525 | 1 | 0.0010 | 0 | 0 | 0 | 1 | 0.0000 | 0.0000 | 0.0000 | 0.0000 | 0.0000 | 0.0000 | 0.0000 | 0.0000 |
| CNVR536 | chr4  | 97333154  | 97441522  | chr4:97333154-97441522    | 108869 | 1 | 0.0010 | 0 | 0 | 0 | 1 | 0.0000 | 0.0000 | 0.0000 | 0.0000 | 0.0000 | 0.0000 | 0.0000 | 0.0000 |
| CNVR537 | chr4  | 10245305  | 102179695 | chr4:10245305-102179695   | 134693 | 1 | 0.0010 | 0 | 0 | 0 | 1 | 0.0000 | 0.0000 | 0.0000 | 0.0000 | 0.0000 | 0.0000 | 0.0000 | 0.0000 |
| CNVR538 | chr4  | 113452813 | 113568290 | chr4:113452813-113568290  | 115478 | 1 | 0.0010 | 0 | 0 | 0 | 1 | 0.0000 | 0.0000 | 0.0000 | 0.0000 | 0.0000 | 0.0000 | 0.0000 | 0.0000 |
| CNVR539 | chr5  | 43125506  | 43289651  | chr5:43125506-43289651    | 164146 | 1 | 0.0010 | 0 | 0 | 0 | 1 | 0.0000 | 0.0000 | 0.0000 | 0.0000 | 0.0000 | 0.0000 | 0.0000 | 0.0000 |
| CNVR540 | chr5  | 83513656  | 83577305  | chr5:83513656-83577305    | 63650  | 1 | 0.0010 | 0 | 0 | 0 | 1 | 0.0000 | 0.0000 | 0.0000 | 0.0000 | 0.0000 | 0.0000 | 0.0000 | 0.0000 |
| CNVR541 | chr5  | 109258533 | 109334069 | chr5:109258533-109334069  | 75537  | 1 | 0.0010 | 0 | 0 | 0 | 1 | 0.0000 | 0.0000 | 0.0000 | 0.0000 | 0.0000 | 0.0000 | 0.0000 | 0.0000 |
| CNVR542 | chr7  | 12365424  | 12446614  | chr7:12365424-12446614    | 81191  | 1 | 0.0010 | 0 | 0 | 0 | 1 | 0.0000 | 0.0000 | 0.0000 | 0.0000 | 0.0000 | 0.0000 | 0.0000 | 0.0000 |
| CNVR543 | chr7  | 18542757  | 18868031  | chr7:18542757-18868031    | 325275 | 1 | 0.0010 | 0 | 0 | 0 | 1 | 0.0000 | 0.0000 | 0.0000 | 0.0000 | 0.0000 | 0.0000 | 0.0000 | 0.0000 |
| CNVR544 | chr7  | 29553456  | 29644909  | chr7:29553456-29644909    | 91454  | 1 | 0.0010 | 0 | 0 | 0 | 1 | 0.0000 | 0.0000 | 0.0000 | 0.0000 | 0.0000 | 0.0000 | 0.0000 | 0.0000 |
| CNVR545 | chr7  | 85962628  | 86213709  | chr7:85962628-86213709    | 251082 | 1 | 0.0010 | 0 | 0 | 0 | 1 | 0.0000 | 0.0000 | 0.0000 | 0.0000 | 0.0000 | 0.0000 | 0.0000 | 0.0000 |
| CNVR546 | chr8  | 76867273  | 76989825  | chr8:76867273-76989825    | 122553 | 1 | 0.0010 | 0 | 0 | 0 | 1 | 0.0000 | 0.0000 | 0.0000 | 0.0000 | 0.0000 | 0.0000 | 0.0000 | 0.0000 |
| CNVR547 | chr8  | 61684627  | 61877493  | chr8:61684627-61877493    | 222809 | 1 | 0.0010 | 0 | 0 | 0 | 1 | 0.0000 | 0.0000 | 0.0000 | 0.0000 | 0.0000 | 0.0000 | 0.0000 | 0.0000 |
| CNVR548 | chr9  | 74041550  | 74108507  | chr9:74041550-74108507    | 66958  | 1 | 0.0010 | 0 | 0 | 0 | 1 | 0.0000 | 0.0000 | 0.0000 | 0.0000 | 0.0000 | 0.0000 | 0.0000 | 0.0000 |
| CNVR549 | chr11 | 92914124  | 93001974  | chr11:92914124-93001974   | 87851  | 1 | 0.0010 | 0 | 0 | 0 | 1 | 0.0000 | 0.0000 | 0.0000 | 0.0000 | 0.0000 | 0.0000 | 0.0000 | 0.0000 |
| CNVR550 | chr12 | 79224532  | 79308837  | chr12:79224532-79308837   | 84306  | 1 | 0.0010 | 0 | 0 | 0 | 1 | 0.0000 | 0.0000 | 0.0000 | 0.0000 | 0.0000 | 0.0000 | 0.0000 | 0.0000 |
| CNVR551 | chr14 | 3059689   | 3164471   | chr14:3059689-3164471     | 104783 | 1 | 0.0010 | 0 | 0 | 0 | 1 | 0.0000 | 0.0000 | 0.0000 | 0.0000 | 0.0000 | 0.0000 | 0.0000 | 0.0000 |
| CNVR552 | chr14 | 10872599  | 10987501  | chr14:10872599-10987501   | 114903 | 1 | 0.0010 | 0 | 0 | 0 | 1 | 0.0000 | 0.0000 | 0.0000 | 0.0000 | 0.0000 | 0.0000 | 0.0000 | 0.0000 |
| CNVR553 | chr14 | 48284245  | 48433358  | chr14:48284245-48433358   | 149114 | 1 | 0.0010 | 0 | 0 | 0 | 1 | 0.0000 | 0.0000 | 0.0000 | 0.0000 | 0.0000 | 0.0000 | 0.0000 | 0.0000 |
| CNVR554 | chr17 | 32993603  | 33382872  | chr17:32993603-33382872   | 389270 | 1 | 0.0010 | 0 | 0 | 0 | 1 | 0.0000 | 0.0000 | 0.0000 | 0.0000 | 0.0000 | 0.0000 | 0.0000 | 0.0000 |
| CNVR555 | chr19 | 38746903  | 38955818  | chr19:38746903-38955818   | 208916 | 1 | 0.0010 | 0 | 0 | 0 | 1 | 0.0000 | 0.0000 | 0.0000 | 0.0000 | 0.0000 | 0.0000 | 0.0000 | 0.0000 |
| CNVR556 | chr20 | 26588813  | 26795021  | chr20:26588813-26795021   | 208209 | 1 | 0.0010 | 0 | 0 | 0 | 1 | 0.0000 | 0.0000 | 0.0000 | 0.0000 | 0.0000 | 0.0000 | 0.0000 | 0.0000 |
| CNVR557 | chr20 | 47576607  | 47819874  | chr20:47576607-47819874   | 243369 | 1 | 0.0010 | 0 | 0 | 0 | 1 | 0.0000 | 0.0000 | 0.0000 | 0.0000 | 0.0000 | 0.0000 | 0.0000 | 0.0000 |
| CNVR558 | chr21 | 1466531   | 1559012   | chr21:1466531-1559012     | 95482  | 1 | 0.0010 | 0 | 0 | 0 | 1 | 0.0000 | 0.0000 | 0.0000 | 0.0000 | 0.0000 | 0.0000 | 0.0000 | 0.0000 |
| CNVR559 | chr22 | 47055287  | 47161595  | chr22:47055287-47161595   | 96309  | 1 | 0.0010 | 0 | 0 | 0 | 1 | 0.0000 | 0.0000 | 0.0000 | 0.0000 | 0.0000 | 0.0000 | 0.0000 | 0.0000 |
| CNVR560 | chr29 | 10585647  | 10716647  | chr29:10585647-10716647   | 131001 | 1 | 0.0010 |   |   |   |   |        |        |        |        |        |        |        |        |

|        |       |          |          |                         |          |   |        |   |   |   |   |        |        |        |        |        |        |        |        |
|--------|-------|----------|----------|-------------------------|----------|---|--------|---|---|---|---|--------|--------|--------|--------|--------|--------|--------|--------|
| CNV628 | chr14 | 45459396 | 45607261 | chr14:45459396-45607261 | 147866   | 1 | 0.0010 | 0 | 0 | 1 | 0 | 0.0000 | 0.0000 | 0.0000 | 0.0000 | 0.0051 | 0.0000 | 0.0000 |        |
| CNV629 | chr14 | 59456779 | 59579304 | chr14:59456779-59579304 | 122526   | 1 | 0.0010 | 0 | 0 | 0 | 1 | 0      | 0.0000 | 0.0000 | 0.0000 | 0.0000 | 0.0051 | 0.0000 | 0.0000 |
| CNV630 | chr14 | 73804621 | 73888215 | chr14:73804621-73888215 | 83595    | 1 | 0.0010 | 0 | 0 | 0 | 1 | 0      | 0.0000 | 0.0000 | 0.0000 | 0.0000 | 0.0051 | 0.0000 | 0.0000 |
| CNV631 | chr15 | 527872   | 892380   | chr15:527872-892380     | 364509   | 1 | 0.0010 | 0 | 0 | 0 | 1 | 0      | 0.0000 | 0.0000 | 0.0000 | 0.0000 | 0.0051 | 0.0000 | 0.0000 |
| CNV632 | chr15 | 2868015  | 3018812  | chr15:2868015-3018812   | 150798   | 1 | 0.0010 | 0 | 0 | 0 | 1 | 0      | 0.0000 | 0.0000 | 0.0000 | 0.0000 | 0.0051 | 0.0000 | 0.0000 |
| CNV633 | chr15 | 22097200 | 22097200 | chr15:22097200-22097200 | 22097200 | 1 | 0.0010 | 0 | 0 | 0 | 1 | 0      | 0.0000 | 0.0000 | 0.0000 | 0.0000 | 0.0051 | 0.0000 | 0.0000 |
| CNV634 | chr15 | 19321626 | 19376628 | chr15:19321626-19376628 | 162603   | 1 | 0.0010 | 0 | 0 | 0 | 1 | 0      | 0.0000 | 0.0000 | 0.0000 | 0.0000 | 0.0051 | 0.0000 | 0.0000 |
| CNV635 | chr15 | 34144913 | 34293320 | chr15:34144913-34293320 | 148408   | 1 | 0.0010 | 0 | 0 | 0 | 1 | 0      | 0.0000 | 0.0000 | 0.0000 | 0.0000 | 0.0051 | 0.0000 | 0.0000 |
| CNV636 | chr16 | 1295994  | 1442001  | chr16:1295994-1442001   | 146008   | 1 | 0.0010 | 0 | 0 | 0 | 1 | 0      | 0.0000 | 0.0000 | 0.0000 | 0.0000 | 0.0051 | 0.0000 | 0.0000 |
| CNV637 | chr16 | 45599008 | 45685755 | chr16:45599008-45685755 | 86748    | 1 | 0.0010 | 0 | 0 | 0 | 1 | 0      | 0.0000 | 0.0000 | 0.0000 | 0.0000 | 0.0051 | 0.0000 | 0.0000 |
| CNV638 | chr16 | 56193168 | 56259124 | chr16:56193168-56259124 | 65957    | 1 | 0.0010 | 0 | 0 | 0 | 1 | 0      | 0.0000 | 0.0000 | 0.0000 | 0.0000 | 0.0051 | 0.0000 | 0.0000 |
| CNV639 | chr17 | 26498165 | 26593036 | chr17:26498165-26593036 | 94872    | 1 | 0.0010 | 0 | 0 | 0 | 1 | 0      | 0.0000 | 0.0000 | 0.0000 | 0.0000 | 0.0051 | 0.0000 | 0.0000 |
| CNV640 | chr17 | 34589013 | 34721831 | chr17:34589013-34721831 | 132819   | 1 | 0.0010 | 0 | 0 | 0 | 1 | 0      | 0.0000 | 0.0000 | 0.0000 | 0.0000 | 0.0051 | 0.0000 | 0.0000 |
| CNV641 | chr17 | 64614722 | 64830332 | chr17:64614722-64830332 | 215611   | 1 | 0.0010 | 0 | 0 | 0 | 1 | 0      | 0.0000 | 0.0000 | 0.0000 | 0.0000 | 0.0051 | 0.0000 | 0.0000 |
| CNV642 | chr18 | 6950076  | 7128416  | chr18:6950076-7128416   | 178341   | 1 | 0.0010 | 0 | 0 | 0 | 1 | 0      | 0.0000 | 0.0000 | 0.0000 | 0.0000 | 0.0051 | 0.0000 | 0.0000 |
| CNV643 | chr18 | 12989914 | 13091266 | chr18:12989914-13091266 | 101353   | 1 | 0.0010 | 0 | 0 | 0 | 1 | 0      | 0.0000 | 0.0000 | 0.0000 | 0.0000 | 0.0051 | 0.0000 | 0.0000 |
| CNV644 | chr18 | 35258123 | 35497867 | chr18:35258123-35497867 | 1139745  | 1 | 0.0010 | 0 | 0 | 0 | 1 | 0      | 0.0000 | 0.0000 | 0.0000 | 0.0000 | 0.0051 | 0.0000 | 0.0000 |
| CNV645 | chr18 | 37947911 | 38042306 | chr18:37947911-38042306 | 94396    | 1 | 0.0010 | 0 | 0 | 0 | 1 | 0      | 0.0000 | 0.0000 | 0.0000 | 0.0000 | 0.0051 | 0.0000 | 0.0000 |
| CNV646 | chr18 | 51159211 | 51287859 | chr18:51159211-51287859 | 128649   | 1 | 0.0010 | 0 | 0 | 0 | 1 | 0      | 0.0000 | 0.0000 | 0.0000 | 0.0000 | 0.0051 | 0.0000 | 0.0000 |
| CNV647 | chr18 | 51842241 | 51988063 | chr18:51842241-51988063 | 145823   | 1 | 0.0010 | 0 | 0 | 0 | 1 | 0      | 0.0000 | 0.0000 | 0.0000 | 0.0000 | 0.0051 | 0.0000 | 0.0000 |
| CNV648 | chr18 | 57161948 | 57209342 | chr18:57161948-57209342 | 47395    | 1 | 0.0010 | 0 | 0 | 0 | 1 | 0      | 0.0000 | 0.0000 | 0.0000 | 0.0000 | 0.0051 | 0.0000 | 0.0000 |
| CNV649 | chr19 | 34056005 | 34177246 | chr19:34056005-34177246 | 121242   | 1 | 0.0010 | 0 | 0 | 0 | 1 | 0      | 0.0000 | 0.0000 | 0.0000 | 0.0000 | 0.0051 | 0.0000 | 0.0000 |
| CNV650 | chr20 | 4474268  | 4569526  | chr20:4474268-4569526   | 95259    | 1 | 0.0010 | 0 | 0 | 0 | 1 | 0      | 0.0000 | 0.0000 | 0.0000 | 0.0000 | 0.0051 | 0.0000 | 0.0000 |
| CNV651 | chr20 | 44362129 | 44458945 | chr20:44362129-44458945 | 96817    | 1 | 0.0010 | 0 | 0 | 0 | 1 | 0      | 0.0000 | 0.0000 | 0.0000 | 0.0000 | 0.0051 | 0.0000 | 0.0000 |
| CNV652 | chr20 | 58627540 | 58913841 | chr20:58627540-58913841 | 286302   | 1 | 0.0010 | 0 | 0 | 0 | 1 | 0      | 0.0000 | 0.0000 | 0.0000 | 0.0000 | 0.0051 | 0.0000 | 0.0000 |
| CNV653 | chr20 | 60508472 | 60566117 | chr20:60508472-60566117 | 62646    | 1 | 0.0010 | 0 | 0 | 0 | 1 | 0      | 0.0000 | 0.0000 | 0.0000 | 0.0000 | 0.0051 | 0.0000 | 0.0000 |
| CNV654 | chr20 | 65286182 | 65345454 | chr20:65286182-65345454 | 78373    | 1 | 0.0010 | 0 | 0 | 0 | 1 | 0      | 0.0000 | 0.0000 | 0.0000 | 0.0000 | 0.0051 | 0.0000 | 0.0000 |
| CNV655 | chr20 | 67442856 | 67499502 | chr20:67442856-67499502 | 56647    | 1 | 0.0010 | 0 | 0 | 0 | 1 | 0      | 0.0000 | 0.0000 | 0.0000 | 0.0000 | 0.0051 | 0.0000 | 0.0000 |
| CNV656 | chr21 | 28529804 | 28738088 | chr21:28529804-28738088 | 208285   | 1 | 0.0010 | 0 | 0 | 0 | 1 | 0      | 0.0000 | 0.0000 | 0.0000 | 0.0000 | 0.0051 | 0.0000 | 0.0000 |
| CNV657 | chr21 | 30888065 | 30973482 | chr21:30888065-30973482 | 85418    | 1 | 0.0010 | 0 | 0 | 0 | 1 | 0      | 0.0000 | 0.0000 | 0.0000 | 0.0000 | 0.0051 | 0.0000 | 0.0000 |
| CNV658 | chr21 | 31719173 | 31812577 | chr21:31719173-31812577 | 93405    | 1 | 0.0010 | 0 | 0 | 0 | 1 | 0      | 0.0000 | 0.0000 | 0.0000 | 0.0000 | 0.0051 | 0.0000 | 0.0000 |
| CNV659 | chr21 | 37467986 | 37574673 | chr21:37467986-37574673 | 106688   | 1 | 0.0010 | 0 | 0 | 0 | 1 | 0      | 0.0000 | 0.0000 | 0.0000 | 0.0000 | 0.0051 | 0.0000 | 0.0000 |
| CNV660 | chr21 | 55080343 | 55209170 | chr21:55080343-55209170 | 128828   | 1 | 0.0010 | 0 | 0 | 0 | 1 | 0      | 0.0000 | 0.0000 | 0.0000 | 0.0000 | 0.0051 | 0.0000 | 0.0000 |
| CNV661 | chr21 | 67585677 | 67669887 | chr21:67585677-67669887 | 84211    | 1 | 0.0010 | 0 | 0 | 0 | 1 | 0      | 0.0000 | 0.0000 | 0.0000 | 0.0000 | 0.0051 | 0.0000 | 0.0000 |
| CNV662 | chr22 | 9502967  | 9640443  | chr22:9502967-9640443   | 137477   | 1 | 0.0010 | 0 | 0 | 0 | 1 | 0      | 0.0000 | 0.0000 | 0.0000 | 0.0000 | 0.0051 | 0.0000 | 0.0000 |
| CNV663 | chr22 | 22688335 | 22744865 | chr22:22688335-22744865 | 76533    | 1 | 0.0010 | 0 | 0 | 0 | 1 | 0      | 0.0000 | 0.0000 | 0.0000 | 0.0000 | 0.0051 | 0.0000 | 0.0000 |
| CNV664 | chr22 | 35488517 | 35621213 | chr22:35488517-35621213 | 132697   | 1 | 0.0010 | 0 | 0 | 0 | 1 | 0      | 0.0000 | 0.0000 | 0.0000 | 0.0000 | 0.0051 | 0.0000 | 0.0000 |
| CNV665 | chr22 | 51369379 | 51430625 | chr22:51369379-51430625 | 61247    | 1 | 0.0010 | 0 | 0 | 0 | 1 | 0      | 0.0000 | 0.0000 | 0.0000 | 0.0000 | 0.0051 | 0.0000 | 0.0000 |
| CNV666 | chr22 | 10769671 | 10849048 | chr22:10769671-10849048 | 79378    | 1 | 0.0010 | 0 | 0 | 0 | 1 | 0      | 0.0000 | 0.0000 | 0.0000 | 0.0000 | 0.0051 | 0.0000 | 0.0000 |
| CNV667 | chr23 | 15677934 | 15766872 | chr23:15677934-15766872 | 88939    | 1 | 0.0010 | 0 | 0 | 0 | 1 | 0      | 0.0000 | 0.0000 | 0.0000 | 0.0000 | 0.0051 | 0.0000 | 0.0000 |
| CNV668 | chr23 | 18519121 | 18717437 | chr23:18519121-18717437 | 135517   | 1 | 0.0010 | 0 | 0 | 0 | 1 | 0      | 0.0000 | 0.0000 | 0.0000 | 0.0000 | 0.0051 | 0.0000 | 0.0000 |
| CNV669 | chr23 | 20813700 | 20924062 | chr23:20813700-20924062 | 110363   | 1 | 0.0010 | 0 | 0 | 0 | 1 | 0      | 0.0000 | 0.0000 | 0.0000 | 0.0000 | 0.0051 | 0.0000 | 0.0000 |
| CNV670 | chr23 | 21493095 | 21575202 | chr23:21493095-21575202 | 82108    | 1 | 0.0010 | 0 | 0 | 0 | 1 | 0      | 0.0000 | 0.0000 | 0.0000 | 0.0000 | 0.0051 | 0.0000 | 0.0000 |
| CNV671 | chr23 | 24128854 | 24230554 | chr23:24128854-24230554 | 101701   | 1 | 0.0010 | 0 | 0 | 0 | 1 | 0      | 0.0000 | 0.0000 | 0.0000 | 0.0000 | 0.0051 | 0.0000 | 0.0000 |
| CNV672 | chr23 | 31986028 | 32212450 | chr23:31986028-32212450 | 226423   | 1 | 0.0010 | 0 | 0 | 0 | 1 | 0      | 0.0000 | 0.0000 | 0.0000 | 0.0000 | 0.0051 | 0.0000 | 0.0000 |
| CNV673 | chr23 | 37064831 | 37185514 | chr23:37064831-37185514 | 120684   | 1 | 0.0010 | 0 | 0 | 0 | 1 | 0      | 0.0000 | 0.0000 | 0.0000 | 0.0000 | 0.0051 | 0.0000 | 0.0000 |
| CNV674 | chr23 | 39379747 | 39697299 | chr23:39379747-39697299 | 317553   | 1 | 0.0010 | 0 | 0 | 0 | 1 | 0      | 0.0000 | 0.0000 | 0.0000 | 0.0000 | 0.0051 | 0.0000 | 0.0000 |
| CNV675 | chr24 | 10985976 | 11061003 | chr24:10985976-11061003 | 75028    | 1 | 0.0010 | 0 | 0 | 0 | 1 | 0      | 0.0000 | 0.0000 | 0.0000 | 0.0000 | 0.0051 | 0.0000 | 0.0000 |
| CNV676 | chr24 | 38417341 | 38501498 | chr24:38417341-38501498 | 84158    | 1 | 0.0010 | 0 | 0 | 0 | 1 | 0      | 0.0000 | 0.0000 | 0.0000 | 0.0000 | 0.0051 | 0.0000 | 0.0000 |
| CNV677 | chr25 | 33911292 | 34027235 | chr25:33911292-34027235 | 115944   | 1 | 0.0010 | 0 | 0 | 0 | 1 | 0      | 0.0000 | 0.0000 | 0.0000 | 0.0000 | 0.0051 | 0.0000 | 0.0000 |
| CNV678 | chr26 | 2065694  | 2262235  | chr26:2065694-2262235   | 196542   | 1 | 0.0010 | 0 | 0 | 0 | 1 | 0      | 0.0000 | 0.0000 | 0.0000 | 0.0000 | 0.0051 | 0.0000 | 0.0000 |
| CNV679 | chr26 | 33161834 | 33202066 | chr26:33161834-33202066 | 40233    | 1 | 0.0010 | 0 | 0 | 0 | 1 | 0      | 0.0000 | 0.0000 | 0.0000 | 0.0000 | 0.0051 | 0.0000 | 0.0000 |
| CNV680 | chr26 | 42955813 | 43046032 | chr26:42955813-43046032 | 90220    | 1 | 0.0010 | 0 | 0 | 0 | 1 | 0      | 0.0000 | 0.0000 | 0.0000 | 0.0000 | 0.0051 | 0.0000 | 0.0000 |
| CNV681 | chr26 | 44433201 | 44499678 | chr26:44433201-44499678 | 66478    | 1 | 0.0010 | 0 | 0 | 0 | 1 | 0      | 0.0000 | 0.0000 | 0.0000 | 0.0000 | 0.0051 | 0.0000 | 0.0000 |
| CNV682 | chr26 | 46709257 | 46795034 | chr26:46709257-46795034 | 85778    | 1 | 0.0010 | 0 | 0 | 0 | 1 | 0      | 0.0000 | 0.0000 | 0.0000 | 0.0000 | 0.0051 | 0.0000 | 0.0000 |
| CNV683 | chr26 | 47667391 | 48097735 | chr26:47667391-48097735 | 430345   | 1 | 0.0010 | 0 | 0 | 0 | 1 | 0      | 0.0000 | 0.0000 | 0.0000 | 0.0000 | 0.0051 | 0.0000 | 0.0000 |
| CNV684 | chr27 | 600341   | 6812164  | chr27:600341-6812164    | 80924    | 1 | 0.0010 | 0 | 0 | 0 | 1 | 0      | 0.0000 | 0.0000 | 0.0000 | 0.0000 | 0.0051 | 0.0000 | 0.0000 |
| CNV685 | chr27 | 835494   | 8489083  | chr27:835494-8489083    | 130590   | 1 | 0.0010 | 0 | 0 | 0 | 1 | 0      | 0.0000 | 0.0000 | 0.0000 | 0.0000 | 0.0051 | 0.0000 | 0.0000 |
| CNV686 | chr27 | 29642060 | 29712792 | chr27:29642060-29712792 | 70733    | 1 | 0.0010 | 0 | 0 | 0 | 1 | 0      | 0.0000 | 0.0000 | 0.0000 | 0.0000 | 0.0051 | 0.0000 | 0.0000 |
| CNV687 | chr27 | 31409958 | 31494155 | chr27:31409958-31494155 | 84198    | 1 |        |   |   |   |   |        |        |        |        |        |        |        |        |

|         |       |           |           |                          |         |   |        |   |   |   |   |   |        |        |        |        |        |        |        |        |
|---------|-------|-----------|-----------|--------------------------|---------|---|--------|---|---|---|---|---|--------|--------|--------|--------|--------|--------|--------|--------|
| CNVR754 | chr2  | 67698071  | 67830799  | chr2:67698071-67830799   | 132729  | 1 | 0.0010 | 0 | 1 | 0 | 0 | 0 | 0.0000 | 0.0055 | 0.0000 | 0.0000 | 0.0000 | 0.0000 | 0.0000 | 0.0000 |
| CNVR755 | chr2  | 115502916 | 115594918 | chr2:115502916-115594918 | 92003   | 1 | 0.0010 | 0 | 1 | 0 | 0 | 0 | 0.0000 | 0.0055 | 0.0000 | 0.0000 | 0.0000 | 0.0000 | 0.0000 | 0.0000 |
| CNVR756 | chr2  | 115685061 | 116147812 | chr2:115685061-116147812 | 462752  | 1 | 0.0010 | 0 | 1 | 0 | 0 | 0 | 0.0000 | 0.0055 | 0.0000 | 0.0000 | 0.0000 | 0.0000 | 0.0000 | 0.0000 |
| CNVR757 | chr3  | 6325012   | 6422003   | chr3:6325012-6422003     | 96992   | 1 | 0.0010 | 0 | 1 | 0 | 0 | 0 | 0.0000 | 0.0055 | 0.0000 | 0.0000 | 0.0000 | 0.0000 | 0.0000 | 0.0000 |
| CNVR758 | chr3  | 96101647  | 96199511  | chr3:96101647-96199511   | 67865   | 1 | 0.0010 | 0 | 1 | 0 | 0 | 0 | 0.0000 | 0.0055 | 0.0000 | 0.0000 | 0.0000 | 0.0000 | 0.0000 | 0.0000 |
| CNVR759 | chr4  | 35130881  | 35233963  | chr4:35130881-35233963   | 103083  | 1 | 0.0010 | 0 | 1 | 0 | 0 | 0 | 0.0000 | 0.0055 | 0.0000 | 0.0000 | 0.0000 | 0.0000 | 0.0000 | 0.0000 |
| CNVR760 | chr4  | 45446083  | 45965116  | chr4:45446083-45965116   | 504624  | 1 | 0.0010 | 0 | 1 | 0 | 0 | 0 | 0.0000 | 0.0055 | 0.0000 | 0.0000 | 0.0000 | 0.0000 | 0.0000 | 0.0000 |
| CNVR761 | chr4  | 55713921  | 55819278  | chr4:55713921-55819278   | 105358  | 1 | 0.0010 | 0 | 1 | 0 | 0 | 0 | 0.0000 | 0.0055 | 0.0000 | 0.0000 | 0.0000 | 0.0000 | 0.0000 | 0.0000 |
| CNVR762 | chr4  | 56073898  | 56137994  | chr4:56073898-56137994   | 64097   | 1 | 0.0010 | 0 | 1 | 0 | 0 | 0 | 0.0000 | 0.0055 | 0.0000 | 0.0000 | 0.0000 | 0.0000 | 0.0000 | 0.0000 |
| CNVR763 | chr4  | 7952981   | 80042807  | chr4:7952981-80042807    | 89827   | 1 | 0.0010 | 0 | 1 | 0 | 0 | 0 | 0.0000 | 0.0055 | 0.0000 | 0.0000 | 0.0000 | 0.0000 | 0.0000 | 0.0000 |
| CNVR764 | chr4  | 85526638  | 85593034  | chr4:85526638-85593034   | 66397   | 1 | 0.0010 | 0 | 1 | 0 | 0 | 0 | 0.0000 | 0.0055 | 0.0000 | 0.0000 | 0.0000 | 0.0000 | 0.0000 | 0.0000 |
| CNVR765 | chr4  | 86334341  | 86525072  | chr4:86334341-86525072   | 190732  | 1 | 0.0010 | 0 | 1 | 0 | 0 | 0 | 0.0000 | 0.0055 | 0.0000 | 0.0000 | 0.0000 | 0.0000 | 0.0000 | 0.0000 |
| CNVR766 | chr5  | 40265375  | 40409665  | chr5:40265375-40409665   | 175591  | 1 | 0.0010 | 0 | 1 | 0 | 0 | 0 | 0.0000 | 0.0055 | 0.0000 | 0.0000 | 0.0000 | 0.0000 | 0.0000 | 0.0000 |
| CNVR767 | chr5  | 63049966  | 63145499  | chr5:63049966-63145499   | 95534   | 1 | 0.0010 | 0 | 1 | 0 | 0 | 0 | 0.0000 | 0.0055 | 0.0000 | 0.0000 | 0.0000 | 0.0000 | 0.0000 | 0.0000 |
| CNVR768 | chr5  | 73241911  | 73464107  | chr5:73241911-73464107   | 222197  | 1 | 0.0010 | 0 | 1 | 0 | 0 | 0 | 0.0000 | 0.0055 | 0.0000 | 0.0000 | 0.0000 | 0.0000 | 0.0000 | 0.0000 |
| CNVR769 | chr5  | 21617336  | 21827241  | chr5:21617336-21827241   | 209906  | 1 | 0.0010 | 0 | 1 | 0 | 0 | 0 | 0.0000 | 0.0055 | 0.0000 | 0.0000 | 0.0000 | 0.0000 | 0.0000 | 0.0000 |
| CNVR770 | chr5  | 26964773  | 27158796  | chr5:26964773-27158796   | 194024  | 1 | 0.0010 | 0 | 1 | 0 | 0 | 0 | 0.0000 | 0.0055 | 0.0000 | 0.0000 | 0.0000 | 0.0000 | 0.0000 | 0.0000 |
| CNVR771 | chr6  | 33660352  | 33964446  | chr6:33660352-33964446   | 304095  | 1 | 0.0010 | 0 | 1 | 0 | 0 | 0 | 0.0000 | 0.0055 | 0.0000 | 0.0000 | 0.0000 | 0.0000 | 0.0000 | 0.0000 |
| CNVR772 | chr6  | 70559090  | 70626499  | chr6:70559090-70626499   | 67410   | 1 | 0.0010 | 0 | 1 | 0 | 0 | 0 | 0.0000 | 0.0055 | 0.0000 | 0.0000 | 0.0000 | 0.0000 | 0.0000 | 0.0000 |
| CNVR773 | chr6  | 113949668 | 114160010 | chr6:113949668-114160010 | 210343  | 1 | 0.0010 | 0 | 1 | 0 | 0 | 0 | 0.0000 | 0.0055 | 0.0000 | 0.0000 | 0.0000 | 0.0000 | 0.0000 | 0.0000 |
| CNVR774 | chr7  | 29243254  | 29340607  | chr7:29243254-29340607   | 97354   | 1 | 0.0010 | 0 | 1 | 0 | 0 | 0 | 0.0000 | 0.0055 | 0.0000 | 0.0000 | 0.0000 | 0.0000 | 0.0000 | 0.0000 |
| CNVR775 | chr7  | 43010166  | 43120244  | chr7:43010166-43120244   | 110079  | 1 | 0.0010 | 0 | 1 | 0 | 0 | 0 | 0.0000 | 0.0055 | 0.0000 | 0.0000 | 0.0000 | 0.0000 | 0.0000 | 0.0000 |
| CNVR776 | chr7  | 100303141 | 100376920 | chr7:100303141-100376920 | 73780   | 1 | 0.0010 | 0 | 1 | 0 | 0 | 0 | 0.0000 | 0.0055 | 0.0000 | 0.0000 | 0.0000 | 0.0000 | 0.0000 | 0.0000 |
| CNVR777 | chr7  | 101344660 | 101662711 | chr7:101344660-101662711 | 318052  | 1 | 0.0010 | 0 | 1 | 0 | 0 | 0 | 0.0000 | 0.0055 | 0.0000 | 0.0000 | 0.0000 | 0.0000 | 0.0000 | 0.0000 |
| CNVR778 | chr7  | 11601437  | 11773450  | chr7:11601437-11773450   | 172014  | 1 | 0.0010 | 0 | 1 | 0 | 0 | 0 | 0.0000 | 0.0055 | 0.0000 | 0.0000 | 0.0000 | 0.0000 | 0.0000 | 0.0000 |
| CNVR779 | chr8  | 30009978  | 30054120  | chr8:30009978-30054120   | 53143   | 1 | 0.0010 | 0 | 1 | 0 | 0 | 0 | 0.0000 | 0.0055 | 0.0000 | 0.0000 | 0.0000 | 0.0000 | 0.0000 | 0.0000 |
| CNVR780 | chr8  | 34762388  | 34846826  | chr8:34762388-34846826   | 83989   | 1 | 0.0010 | 0 | 1 | 0 | 0 | 0 | 0.0000 | 0.0055 | 0.0000 | 0.0000 | 0.0000 | 0.0000 | 0.0000 | 0.0000 |
| CNVR781 | chr8  | 10218158  | 10311903  | chr8:10218158-10311903   | 83746   | 1 | 0.0010 | 0 | 1 | 0 | 0 | 0 | 0.0000 | 0.0055 | 0.0000 | 0.0000 | 0.0000 | 0.0000 | 0.0000 | 0.0000 |
| CNVR782 | chr9  | 40838152  | 41051042  | chr9:40838152-41051042   | 212891  | 1 | 0.0010 | 0 | 1 | 0 | 0 | 0 | 0.0000 | 0.0055 | 0.0000 | 0.0000 | 0.0000 | 0.0000 | 0.0000 | 0.0000 |
| CNVR783 | chr9  | 56906366  | 57009675  | chr9:56906366-57009675   | 103310  | 1 | 0.0010 | 0 | 1 | 0 | 0 | 0 | 0.0000 | 0.0055 | 0.0000 | 0.0000 | 0.0000 | 0.0000 | 0.0000 | 0.0000 |
| CNVR784 | chr10 | 1299930   | 1502925   | chr10:1299930-1502925    | 202996  | 1 | 0.0010 | 0 | 1 | 0 | 0 | 0 | 0.0000 | 0.0055 | 0.0000 | 0.0000 | 0.0000 | 0.0000 | 0.0000 | 0.0000 |
| CNVR785 | chr10 | 20064446  | 20144124  | chr10:20064446-20144124  | 79679   | 1 | 0.0010 | 0 | 1 | 0 | 0 | 0 | 0.0000 | 0.0055 | 0.0000 | 0.0000 | 0.0000 | 0.0000 | 0.0000 | 0.0000 |
| CNVR786 | chr10 | 76693884  | 76765958  | chr10:76693884-76765958  | 72075   | 1 | 0.0010 | 0 | 1 | 0 | 0 | 0 | 0.0000 | 0.0055 | 0.0000 | 0.0000 | 0.0000 | 0.0000 | 0.0000 | 0.0000 |
| CNVR787 | chr10 | 84757242  | 84913742  | chr10:84757242-84913742  | 156501  | 1 | 0.0010 | 0 | 1 | 0 | 0 | 0 | 0.0000 | 0.0055 | 0.0000 | 0.0000 | 0.0000 | 0.0000 | 0.0000 | 0.0000 |
| CNVR788 | chr11 | 3595697   | 3765229   | chr11:3595697-3765229    | 160833  | 1 | 0.0010 | 0 | 1 | 0 | 0 | 0 | 0.0000 | 0.0055 | 0.0000 | 0.0000 | 0.0000 | 0.0000 | 0.0000 | 0.0000 |
| CNVR789 | chr11 | 40568552  | 40179108  | chr11:40568552-40179108  | 109557  | 1 | 0.0010 | 0 | 1 | 0 | 0 | 0 | 0.0000 | 0.0055 | 0.0000 | 0.0000 | 0.0000 | 0.0000 | 0.0000 | 0.0000 |
| CNVR790 | chr11 | 88055301  | 88173849  | chr11:88055301-88173849  | 118049  | 1 | 0.0010 | 0 | 1 | 0 | 0 | 0 | 0.0000 | 0.0055 | 0.0000 | 0.0000 | 0.0000 | 0.0000 | 0.0000 | 0.0000 |
| CNVR791 | chr12 | 10813289  | 10963759  | chr12:10813289-10963759  | 150471  | 1 | 0.0010 | 0 | 1 | 0 | 0 | 0 | 0.0000 | 0.0055 | 0.0000 | 0.0000 | 0.0000 | 0.0000 | 0.0000 | 0.0000 |
| CNVR792 | chr12 | 16292888  | 16481217  | chr12:16292888-16481217  | 188330  | 1 | 0.0010 | 0 | 1 | 0 | 0 | 0 | 0.0000 | 0.0055 | 0.0000 | 0.0000 | 0.0000 | 0.0000 | 0.0000 | 0.0000 |
| CNVR793 | chr12 | 16778944  | 18126002  | chr12:16778944-18126002  | 1347059 | 1 | 0.0010 | 0 | 1 | 0 | 0 | 0 | 0.0000 | 0.0055 | 0.0000 | 0.0000 | 0.0000 | 0.0000 | 0.0000 | 0.0000 |
| CNVR794 | chr12 | 22933591  | 23015344  | chr12:22933591-23015344  | 81754   | 1 | 0.0010 | 0 | 1 | 0 | 0 | 0 | 0.0000 | 0.0055 | 0.0000 | 0.0000 | 0.0000 | 0.0000 | 0.0000 | 0.0000 |
| CNVR795 | chr12 | 44858848  | 45084172  | chr12:44858848-45084172  | 225325  | 1 | 0.0010 | 0 | 1 | 0 | 0 | 0 | 0.0000 | 0.0055 | 0.0000 | 0.0000 | 0.0000 | 0.0000 | 0.0000 | 0.0000 |
| CNVR796 | chr12 | 81604713  | 81838304  | chr12:81604713-81838304  | 233592  | 1 | 0.0010 | 0 | 1 | 0 | 0 | 0 | 0.0000 | 0.0055 | 0.0000 | 0.0000 | 0.0000 | 0.0000 | 0.0000 | 0.0000 |
| CNVR797 | chr12 | 85534280  | 85844043  | chr12:85534280-85844043  | 309764  | 1 | 0.0010 | 0 | 1 | 0 | 0 | 0 | 0.0000 | 0.0055 | 0.0000 | 0.0000 | 0.0000 | 0.0000 | 0.0000 | 0.0000 |
| CNVR798 | chr13 | 66099996  | 66166425  | chr13:66099996-66166425  | 70430   | 1 | 0.0010 | 0 | 1 | 0 | 0 | 0 | 0.0000 | 0.0055 | 0.0000 | 0.0000 | 0.0000 | 0.0000 | 0.0000 | 0.0000 |
| CNVR799 | chr14 | 91405171  | 91740126  | chr14:91405171-91740126  | 368076  | 1 | 0.0010 | 0 | 1 | 0 | 0 | 0 | 0.0000 | 0.0055 | 0.0000 | 0.0000 | 0.0000 | 0.0000 | 0.0000 | 0.0000 |
| CNVR800 | chr15 | 12375173  | 12313663  | chr15:12375173-12313663  | 238491  | 1 | 0.0010 | 0 | 1 | 0 | 0 | 0 | 0.0000 | 0.0055 | 0.0000 | 0.0000 | 0.0000 | 0.0000 | 0.0000 | 0.0000 |
| CNVR801 | chr15 | 22250905  | 22381340  | chr15:22250905-22381340  | 130436  | 1 | 0.0010 | 0 | 1 | 0 | 0 | 0 | 0.0000 | 0.0055 | 0.0000 | 0.0000 | 0.0000 | 0.0000 | 0.0000 | 0.0000 |
| CNVR802 | chr15 | 58543693  | 58651552  | chr15:58543693-58651552  | 107860  | 1 | 0.0010 | 0 | 1 | 0 | 0 | 0 | 0.0000 | 0.0055 | 0.0000 | 0.0000 | 0.0000 | 0.0000 | 0.0000 | 0.0000 |
| CNVR803 | chr15 | 72084302  | 72589246  | chr15:72084302-72589246  | 504945  | 1 | 0.0010 | 0 | 1 | 0 | 0 | 0 | 0.0000 | 0.0055 | 0.0000 | 0.0000 | 0.0000 | 0.0000 | 0.0000 | 0.0000 |
| CNVR804 | chr16 | 2128389   | 2226255   | chr16:2128389-2226255    | 97867   | 1 | 0.0010 | 0 | 1 | 0 | 0 | 0 | 0.0000 | 0.0055 | 0.0000 | 0.0000 | 0.0000 | 0.0000 | 0.0000 | 0.0000 |
| CNVR805 | chr16 | 30841502  | 30925357  | chr16:30841502-30925357  | 83856   | 1 | 0.0010 | 0 | 1 | 0 | 0 | 0 | 0.0000 | 0.0055 | 0.0000 | 0.0000 | 0.0000 | 0.0000 | 0.0000 | 0.0000 |
| CNVR806 | chr18 | 21894757  | 22112625  | chr18:21894757-22112625  | 217869  | 1 | 0.0010 | 0 | 1 | 0 | 0 | 0 | 0.0000 | 0.0055 | 0.0000 | 0.0000 | 0.0000 | 0.0000 | 0.0000 | 0.0000 |
| CNVR807 | chr18 | 56302975  | 56424674  | chr18:56302975-56424674  | 121700  | 1 | 0.0010 | 0 | 1 | 0 | 0 | 0 | 0.0000 | 0.0055 | 0.0000 | 0.0000 | 0.0000 | 0.0000 | 0.0000 | 0.0000 |
| CNVR808 | chr19 | 2400957   | 2728396   | chr19:2400957-2728396    | 327440  | 1 | 0.0010 | 0 | 1 | 0 | 0 | 0 | 0.0000 | 0.0055 | 0.0000 | 0.0000 | 0.0000 | 0.0000 | 0.0000 | 0.0000 |
| CNVR809 | chr19 | 49324897  | 49411887  | chr19:49324897-49411887  | 86991   | 1 | 0.0010 | 0 | 1 | 0 | 0 | 0 | 0.0000 | 0.0055 | 0.0000 | 0.0000 | 0.0000 | 0.0000 | 0.0000 | 0.0000 |
| CNVR810 | chr20 | 748578    | 843317    | chr20:748                |         |   |        |   |   |   |   |   |        |        |        |        |        |        |        |        |

|         |       |           |            |                          |        |   |        |   |   |   |   |   |        |        |        |        |        |        |        |
|---------|-------|-----------|------------|--------------------------|--------|---|--------|---|---|---|---|---|--------|--------|--------|--------|--------|--------|--------|
| CNVR880 | chr6  | 90133650  | 90743595   | chr6:90133650-90743595   | 609946 | 1 | 0.0010 | 1 | 0 | 0 | 0 | 0 | 0.0024 | 0.0000 | 0.0000 | 0.0000 | 0.0000 | 0.0000 | 0.0000 |
| CNVR881 | chr6  | 104271586 | 104358436  | chr6:104271586-104358436 | 86651  | 1 | 0.0010 | 1 | 0 | 0 | 0 | 0 | 0.0024 | 0.0000 | 0.0000 | 0.0000 | 0.0000 | 0.0000 | 0.0000 |
| CNVR882 | chr7  | 7163072   | 7366049    | chr7:7163072-7366049     | 202978 | 1 | 0.0010 | 1 | 0 | 0 | 0 | 0 | 0.0024 | 0.0000 | 0.0000 | 0.0000 | 0.0000 | 0.0000 | 0.0000 |
| CNVR883 | chr7  | 9734530   | 10059578   | chr7:9734530-10059578    | 325049 | 1 | 0.0010 | 1 | 0 | 0 | 0 | 0 | 0.0024 | 0.0000 | 0.0000 | 0.0000 | 0.0000 | 0.0000 | 0.0000 |
| CNVR884 | chr7  | 20361359  | 20698534   | chr7:20361359-20698534   | 337176 | 1 | 0.0010 | 1 | 0 | 0 | 0 | 0 | 0.0024 | 0.0000 | 0.0000 | 0.0000 | 0.0000 | 0.0000 | 0.0000 |
| CNVR885 | chr7  | 33735084  | 33837133   | chr7:33735084-33837133   | 102053 | 1 | 0.0010 | 1 | 0 | 0 | 0 | 0 | 0.0024 | 0.0000 | 0.0000 | 0.0000 | 0.0000 | 0.0000 | 0.0000 |
| CNVR886 | chr7  | 37883114  | 37956104   | chr7:37883114-37956104   | 72991  | 1 | 0.0010 | 1 | 0 | 0 | 0 | 0 | 0.0024 | 0.0000 | 0.0000 | 0.0000 | 0.0000 | 0.0000 | 0.0000 |
| CNVR887 | chr7  | 42181999  | 42415988   | chr7:42181999-42415988   | 233990 | 1 | 0.0010 | 1 | 0 | 0 | 0 | 0 | 0.0024 | 0.0000 | 0.0000 | 0.0000 | 0.0000 | 0.0000 | 0.0000 |
| CNVR888 | chr7  | 70404518  | 70553427   | chr7:70404518-70553427   | 148910 | 1 | 0.0010 | 1 | 0 | 0 | 0 | 0 | 0.0024 | 0.0000 | 0.0000 | 0.0000 | 0.0000 | 0.0000 | 0.0000 |
| CNVR889 | chr7  | 74510443  | 74754931   | chr7:74510443-74754931   | 244489 | 1 | 0.0010 | 1 | 0 | 0 | 0 | 0 | 0.0024 | 0.0000 | 0.0000 | 0.0000 | 0.0000 | 0.0000 | 0.0000 |
| CNVR890 | chr7  | 97808036  | 97949446   | chr7:97808036-97949446   | 141411 | 1 | 0.0010 | 1 | 0 | 0 | 0 | 0 | 0.0024 | 0.0000 | 0.0000 | 0.0000 | 0.0000 | 0.0000 | 0.0000 |
| CNVR891 | chr8  | 7005801   | 7070628    | chr8:7005801-7070628     | 64828  | 1 | 0.0010 | 1 | 0 | 0 | 0 | 0 | 0.0024 | 0.0000 | 0.0000 | 0.0000 | 0.0000 | 0.0000 | 0.0000 |
| CNVR892 | chr8  | 88081045  | 88172182   | chr8:88081045-88172182   | 91138  | 1 | 0.0010 | 1 | 0 | 0 | 0 | 0 | 0.0024 | 0.0000 | 0.0000 | 0.0000 | 0.0000 | 0.0000 | 0.0000 |
| CNVR893 | chr8  | 91507970  | 91747796   | chr8:91507970-91747796   | 239827 | 1 | 0.0010 | 1 | 0 | 0 | 0 | 0 | 0.0024 | 0.0000 | 0.0000 | 0.0000 | 0.0000 | 0.0000 | 0.0000 |
| CNVR894 | chr9  | 629203    | 715218     | chr9:629203-715218       | 86016  | 1 | 0.0010 | 1 | 0 | 0 | 0 | 0 | 0.0024 | 0.0000 | 0.0000 | 0.0000 | 0.0000 | 0.0000 | 0.0000 |
| CNVR895 | chr9  | 7326962   | 73354938   | chr9:7326962-73354938    | 84977  | 1 | 0.0010 | 1 | 0 | 0 | 0 | 0 | 0.0024 | 0.0000 | 0.0000 | 0.0000 | 0.0000 | 0.0000 | 0.0000 |
| CNVR896 | chr10 | 14669937  | 14862961   | chr10:14669937-14862961  | 92045  | 1 | 0.0010 | 1 | 0 | 0 | 0 | 0 | 0.0024 | 0.0000 | 0.0000 | 0.0000 | 0.0000 | 0.0000 | 0.0000 |
| CNVR897 | chr10 | 31025271  | 31115136   | chr10:31025271-31115136  | 89866  | 1 | 0.0010 | 1 | 0 | 0 | 0 | 0 | 0.0024 | 0.0000 | 0.0000 | 0.0000 | 0.0000 | 0.0000 | 0.0000 |
| CNVR898 | chr10 | 36254424  | 36455548   | chr10:36254424-36455548  | 201125 | 1 | 0.0010 | 1 | 0 | 0 | 0 | 0 | 0.0024 | 0.0000 | 0.0000 | 0.0000 | 0.0000 | 0.0000 | 0.0000 |
| CNVR899 | chr10 | 37036760  | 37159998   | chr10:37036760-37159998  | 123239 | 1 | 0.0010 | 1 | 0 | 0 | 0 | 0 | 0.0024 | 0.0000 | 0.0000 | 0.0000 | 0.0000 | 0.0000 | 0.0000 |
| CNVR900 | chr10 | 40406980  | 40595336   | chr10:40406980-40595336  | 188357 | 1 | 0.0010 | 1 | 0 | 0 | 0 | 0 | 0.0024 | 0.0000 | 0.0000 | 0.0000 | 0.0000 | 0.0000 | 0.0000 |
| CNVR901 | chr10 | 43971237  | 44069718   | chr10:43971237-44069718  | 98482  | 1 | 0.0010 | 1 | 0 | 0 | 0 | 0 | 0.0024 | 0.0000 | 0.0000 | 0.0000 | 0.0000 | 0.0000 | 0.0000 |
| CNVR902 | chr10 | 50979449  | 51090271   | chr10:50979449-51090271  | 110823 | 1 | 0.0010 | 1 | 0 | 0 | 0 | 0 | 0.0024 | 0.0000 | 0.0000 | 0.0000 | 0.0000 | 0.0000 | 0.0000 |
| CNVR903 | chr10 | 63008049  | 63095806   | chr10:63008049-63095806  | 87758  | 1 | 0.0010 | 1 | 0 | 0 | 0 | 0 | 0.0024 | 0.0000 | 0.0000 | 0.0000 | 0.0000 | 0.0000 | 0.0000 |
| CNVR904 | chr10 | 64695254  | 64811188   | chr10:64695254-64811188  | 115935 | 1 | 0.0010 | 1 | 0 | 0 | 0 | 0 | 0.0024 | 0.0000 | 0.0000 | 0.0000 | 0.0000 | 0.0000 | 0.0000 |
| CNVR905 | chr10 | 91891395  | 91967134   | chr10:91891395-91967134  | 951199 | 1 | 0.0010 | 1 | 0 | 0 | 0 | 0 | 0.0024 | 0.0000 | 0.0000 | 0.0000 | 0.0000 | 0.0000 | 0.0000 |
| CNVR906 | chr10 | 99909994  | 100043023  | chr10:99909994-100043023 | 138930 | 1 | 0.0010 | 1 | 0 | 0 | 0 | 0 | 0.0024 | 0.0000 | 0.0000 | 0.0000 | 0.0000 | 0.0000 | 0.0000 |
| CNVR907 | chr11 | 12079570  | 12282920   | chr11:12079570-12282920  | 203351 | 1 | 0.0010 | 1 | 0 | 0 | 0 | 0 | 0.0024 | 0.0000 | 0.0000 | 0.0000 | 0.0000 | 0.0000 | 0.0000 |
| CNVR908 | chr11 | 76292180  | 76391018   | chr11:76292180-76391018  | 98839  | 1 | 0.0010 | 1 | 0 | 0 | 0 | 0 | 0.0024 | 0.0000 | 0.0000 | 0.0000 | 0.0000 | 0.0000 | 0.0000 |
| CNVR909 | chr11 | 79077594  | 79172715   | chr11:79077594-79172715  | 95122  | 1 | 0.0010 | 1 | 0 | 0 | 0 | 0 | 0.0024 | 0.0000 | 0.0000 | 0.0000 | 0.0000 | 0.0000 | 0.0000 |
| CNVR910 | chr12 | 2666482   | 3001948    | chr12:2666482-3001948    | 335467 | 1 | 0.0010 | 1 | 0 | 0 | 0 | 0 | 0.0024 | 0.0000 | 0.0000 | 0.0000 | 0.0000 | 0.0000 | 0.0000 |
| CNVR911 | chr12 | 10261343  | 10404962   | chr12:10261343-10404962  | 143620 | 1 | 0.0010 | 1 | 0 | 0 | 0 | 0 | 0.0024 | 0.0000 | 0.0000 | 0.0000 | 0.0000 | 0.0000 | 0.0000 |
| CNVR912 | chr12 | 19039190  | 19116544   | chr12:19039190-19116544  | 77355  | 1 | 0.0010 | 1 | 0 | 0 | 0 | 0 | 0.0024 | 0.0000 | 0.0000 | 0.0000 | 0.0000 | 0.0000 | 0.0000 |
| CNVR913 | chr12 | 21753422  | 22040944   | chr12:21753422-22040944  | 287523 | 1 | 0.0010 | 1 | 0 | 0 | 0 | 0 | 0.0024 | 0.0000 | 0.0000 | 0.0000 | 0.0000 | 0.0000 | 0.0000 |
| CNVR914 | chr12 | 25624268  | 25821365   | chr12:25624268-25821365  | 197998 | 1 | 0.0010 | 1 | 0 | 0 | 0 | 0 | 0.0024 | 0.0000 | 0.0000 | 0.0000 | 0.0000 | 0.0000 | 0.0000 |
| CNVR915 | chr12 | 29490736  | 29578997   | chr12:29490736-29578997  | 88362  | 1 | 0.0010 | 1 | 0 | 0 | 0 | 0 | 0.0024 | 0.0000 | 0.0000 | 0.0000 | 0.0000 | 0.0000 | 0.0000 |
| CNVR916 | chr12 | 43632105  | 43807467   | chr12:43632105-43807467  | 175363 | 1 | 0.0010 | 1 | 0 | 0 | 0 | 0 | 0.0024 | 0.0000 | 0.0000 | 0.0000 | 0.0000 | 0.0000 | 0.0000 |
| CNVR917 | chr12 | 46891294  | 47079426   | chr12:46891294-47079426  | 188133 | 1 | 0.0010 | 1 | 0 | 0 | 0 | 0 | 0.0024 | 0.0000 | 0.0000 | 0.0000 | 0.0000 | 0.0000 | 0.0000 |
| CNVR918 | chr12 | 57169386  | 57268475   | chr12:57169386-57268475  | 99090  | 1 | 0.0010 | 1 | 0 | 0 | 0 | 0 | 0.0024 | 0.0000 | 0.0000 | 0.0000 | 0.0000 | 0.0000 | 0.0000 |
| CNVR919 | chr12 | 81331464  | 81481916   | chr12:81331464-81481916  | 150453 | 1 | 0.0010 | 1 | 0 | 0 | 0 | 0 | 0.0024 | 0.0000 | 0.0000 | 0.0000 | 0.0000 | 0.0000 | 0.0000 |
| CNVR920 | chr13 | 36365177  | 36698725   | chr13:36365177-36698725  | 333549 | 1 | 0.0010 | 1 | 0 | 0 | 0 | 0 | 0.0024 | 0.0000 | 0.0000 | 0.0000 | 0.0000 | 0.0000 | 0.0000 |
| CNVR921 | chr13 | 55121476  | 55279634   | chr13:55121476-55279634  | 158159 | 1 | 0.0010 | 1 | 0 | 0 | 0 | 0 | 0.0024 | 0.0000 | 0.0000 | 0.0000 | 0.0000 | 0.0000 | 0.0000 |
| CNVR922 | chr13 | 55874198  | 56703165   | chr13:55874198-56703165  | 828968 | 1 | 0.0010 | 1 | 0 | 0 | 0 | 0 | 0.0024 | 0.0000 | 0.0000 | 0.0000 | 0.0000 | 0.0000 | 0.0000 |
| CNVR923 | chr14 | 9989438   | 10179814   | chr14:9989438-10179814   | 190377 | 1 | 0.0010 | 1 | 0 | 0 | 0 | 0 | 0.0024 | 0.0000 | 0.0000 | 0.0000 | 0.0000 | 0.0000 | 0.0000 |
| CNVR924 | chr14 | 22635805  | 22720113   | chr14:22635805-22720113  | 84309  | 1 | 0.0010 | 1 | 0 | 0 | 0 | 0 | 0.0024 | 0.0000 | 0.0000 | 0.0000 | 0.0000 | 0.0000 | 0.0000 |
| CNVR925 | chr14 | 39828614  | 39848864   | chr14:39828614-39848864  | 215173 | 1 | 0.0010 | 1 | 0 | 0 | 0 | 0 | 0.0024 | 0.0000 | 0.0000 | 0.0000 | 0.0000 | 0.0000 | 0.0000 |
| CNVR926 | chr15 | 57947034  | 58034107   | chr15:57947034-58034107  | 87074  | 1 | 0.0010 | 1 | 0 | 0 | 0 | 0 | 0.0024 | 0.0000 | 0.0000 | 0.0000 | 0.0000 | 0.0000 | 0.0000 |
| CNVR927 | chr15 | 64364696  | 64507990   | chr15:64364696-64507990  | 143295 | 1 | 0.0010 | 1 | 0 | 0 | 0 | 0 | 0.0024 | 0.0000 | 0.0000 | 0.0000 | 0.0000 | 0.0000 | 0.0000 |
| CNVR928 | chr16 | 7246042   | 7387679    | chr16:7246042-7387679    | 141638 | 1 | 0.0010 | 1 | 0 | 0 | 0 | 0 | 0.0024 | 0.0000 | 0.0000 | 0.0000 | 0.0000 | 0.0000 | 0.0000 |
| CNVR929 | chr16 | 60525330  | 60739972   | chr16:60525330-60739972  | 214643 | 1 | 0.0010 | 1 | 0 | 0 | 0 | 0 | 0.0024 | 0.0000 | 0.0000 | 0.0000 | 0.0000 | 0.0000 | 0.0000 |
| CNVR930 | chr16 | 64812585  | 65050228   | chr16:64812585-65050228  | 237644 | 1 | 0.0010 | 1 | 0 | 0 | 0 | 0 | 0.0024 | 0.0000 | 0.0000 | 0.0000 | 0.0000 | 0.0000 | 0.0000 |
| CNVR931 | chr16 | 76484465  | 77330832   | chr16:76484465-77330832  | 846368 | 1 | 0.0010 | 1 | 0 | 0 | 0 | 0 | 0.0024 | 0.0000 | 0.0000 | 0.0000 | 0.0000 | 0.0000 | 0.0000 |
| CNVR932 | chr17 | 21255664  | 21314185   | chr17:21255664-21314185  | 58522  | 1 | 0.0010 | 1 | 0 | 0 | 0 | 0 | 0.0024 | 0.0000 | 0.0000 | 0.0000 | 0.0000 | 0.0000 | 0.0000 |
| CNVR933 | chr17 | 22047219  | 22112889   | chr17:22047219-22112889  | 65671  | 1 | 0.0010 | 1 | 0 | 0 | 0 | 0 | 0.0024 | 0.0000 | 0.0000 | 0.0000 | 0.0000 | 0.0000 | 0.0000 |
| CNVR934 | chr17 | 32059469  | 32137861   | chr17:32059469-32137861  | 78993  | 1 | 0.0010 | 1 | 0 | 0 | 0 | 0 | 0.0024 | 0.0000 | 0.0000 | 0.0000 | 0.0000 | 0.0000 | 0.0000 |
| CNVR935 | chr17 | 54610130  | 54966539   | chr17:54610130-54966539  | 364100 | 1 | 0.0010 | 1 | 0 | 0 | 0 | 0 | 0.0024 | 0.0000 | 0.0000 | 0.0000 | 0.0000 | 0.0000 | 0.0000 |
| CNVR936 | chr17 | 51875297  | 52238128   | chr17:51875297-52238128  | 353132 | 1 | 0.0010 | 1 | 0 | 0 | 0 | 0 | 0.0024 | 0.0000 | 0.0000 | 0.0000 | 0.0000 | 0.0000 | 0.0000 |
| CNVR937 | chr18 | 475689    | 655061     | chr18:475689-655061      | 179373 | 1 | 0.0010 | 1 | 0 | 0 | 0 | 0 | 0.0024 | 0.0000 | 0.0000 | 0.0000 | 0.0000 | 0.0000 | 0.0000 |
| CNVR938 | chr18 | 2169844   | 2374105    | chr18:2169844-2374105    | 204262 | 1 | 0.0010 | 1 | 0 | 0 | 0 | 0 | 0.0024 | 0.0000 | 0.0000 | 0.0000 | 0.0000 | 0.0000 | 0.0000 |
| CNVR939 | chr18 | 24915571  | 25015911</ |                          |        |   |        |   |   |   |   |   |        |        |        |        |        |        |        |
