# Supplementary material
Source: PubMed Central journal article supplement (PMC6462038)
Supplement: 41437_2018_150_MOESM6_ESM.pdf [file 41437_2018_150_MOESM6_ESM.pdf]

**Supplementary Table S4 Genes identified in CNVRs and/or observed in OMIA database**

| NO. CNVR | CNVR                     | Gene     | VAR    | OMIA database                      |         |             |
|----------|--------------------------|----------|--------|------------------------------------|---------|-------------|
|          |                          |          |        | Trait/disorder                     | Species | OMIA number |
| CNVR1    | chr17:59870207-61156582  | EDNRA    | 0.0627 | Coat colour, white goat            |         | 000214      |
| CNVR1    | chr17:59870207-61156582  | TMEM184C | 0.0627 |                                    |         |             |
| CNVR1    | chr17:59870207-61156582  | ARHGAP10 | 0.0627 |                                    |         |             |
| CNVR1    | chr17:59870207-61156582  | NR3C2    | 0.0627 |                                    |         |             |
| CNVR1    | chr17:59870207-61156582  | PRMT9    | 0.0627 |                                    |         |             |
| CNVR2    | chr5:36233025-36842273   | PUS7L    | 0.0542 | Cleft lip with or wi dog           |         | 001140      |
| CNVR2    | chr5:36233025-36842273   | ADAMTS20 | 0.0542 |                                    |         |             |
| CNVR8    | chr3:80113767-80962349   | RNPC3    | 0.0294 |                                    |         |             |
| CNVR8    | chr3:80113767-80962349   | COL11A1  | 0.0294 |                                    |         |             |
| CNVR7    | chr20:70385615-71781295  | IRX4     | 0.0266 |                                    |         |             |
| CNVR7    | chr20:70385615-71781295  | NDUFS6   | 0.0266 |                                    |         |             |
| CNVR7    | chr20:70385615-71781295  | MRPL36   | 0.0266 |                                    |         |             |
| CNVR7    | chr20:70385615-71781295  | LPCAT1   | 0.0266 |                                    |         |             |
| CNVR7    | chr20:70385615-71781295  | SLC6A3   | 0.0266 |                                    |         |             |
| CNVR7    | chr20:70385615-71781295  | SLC12A7  | 0.0266 |                                    |         |             |
| CNVR7    | chr20:70385615-71781295  | NKD2     | 0.0266 |                                    |         |             |
| CNVR7    | chr20:70385615-71781295  | TRIP13   | 0.0266 |                                    |         |             |
| CNVR7    | chr20:70385615-71781295  | BRD9     | 0.0266 |                                    |         |             |
| CNVR7    | chr20:70385615-71781295  | TERT     | 0.0266 |                                    |         |             |
| CNVR7    | chr20:70385615-71781295  | SLC6A18  | 0.0266 |                                    |         |             |
| CNVR7    | chr20:70385615-71781295  | SLC6A19  | 0.0266 |                                    |         |             |
| CNVR7    | chr20:70385615-71781295  | TPPP     | 0.0266 |                                    |         |             |
| CNVR7    | chr20:70385615-71781295  | CEP72    | 0.0266 |                                    |         |             |
| CNVR7    | chr20:70385615-71781295  | SLC9A3   | 0.0266 |                                    |         |             |
| CNVR7    | chr20:70385615-71781295  | EXOC3    | 0.0266 |                                    |         |             |
| CNVR7    | chr20:70385615-71781295  | AHRR     | 0.0266 |                                    |         |             |
| CNVR7    | chr20:70385615-71781295  | PDCD6    | 0.0266 |                                    |         |             |
| CNVR7    | chr20:70385615-71781295  | SDHA     | 0.0266 |                                    |         |             |
| CNVR7    | chr20:70385615-71781295  | CCDC127  | 0.0266 |                                    |         |             |
| CNVR7    | chr20:70385615-71781295  | LRRC14B  | 0.0266 |                                    |         |             |
| CNVR6    | chr6:116288145-117571225 | RNF4     | 0.0181 |                                    |         |             |
| CNVR6    | chr6:116288145-117571225 | FAM193A  | 0.0181 |                                    |         |             |
| CNVR6    | chr6:116288145-117571225 | TNIP2    | 0.0181 |                                    |         |             |
| CNVR6    | chr6:116288145-117571225 | SH3BP2   | 0.0181 |                                    |         |             |
| CNVR6    | chr6:116288145-117571225 | ADD1     | 0.0181 |                                    |         |             |
| CNVR6    | chr6:116288145-117571225 | MFSD10   | 0.0181 |                                    |         |             |
| CNVR6    | chr6:116288145-117571225 | NOP14    | 0.0181 |                                    |         |             |
| CNVR6    | chr6:116288145-117571225 | GRK4     | 0.0181 |                                    |         |             |
| CNVR6    | chr6:116288145-117571225 | HTT      | 0.0181 |                                    |         |             |
| CNVR6    | chr6:116288145-117571225 | NKX1-1   | 0.0181 |                                    |         |             |
| CNVR6    | chr6:116288145-117571225 | UVSSA    | 0.0181 |                                    |         |             |
| CNVR6    | chr6:116288145-117571225 | MAEA     | 0.0181 |                                    |         |             |
| CNVR6    | chr6:116288145-117571225 | CTBP1    | 0.0181 |                                    |         |             |
| CNVR6    | chr6:116288145-117571225 | SPON2    | 0.0181 |                                    |         |             |
| CNVR6    | chr6:116288145-117571225 | IDUA     | 0.0181 | Mucopolysacchari dog, dome: 000664 |         |             |

|       |                          |         |        |                           |        |
|-------|--------------------------|---------|--------|---------------------------|--------|
| CNVR6 | chr6:116288145-117571225 | SLC26A1 | 0.0181 |                           |        |
| CNVR6 | chr6:116288145-117571225 | DGKQ    | 0.0181 |                           |        |
| CNVR6 | chr6:116288145-117571225 | CPLX1   | 0.0181 |                           |        |
| CNVR6 | chr6:116288145-117571225 | PCGF3   | 0.0181 |                           |        |
| CNVR6 | chr6:116288145-117571225 | MFSD7   | 0.0181 |                           |        |
| CNVR6 | chr6:116288145-117571225 | ATP5I   | 0.0181 |                           |        |
| CNVR6 | chr6:116288145-117571225 | PDE6B   | 0.0181 | Rod-cone dysplasi: dog    | 000882 |
|       |                          |         |        | Rod-cone dysplasi: dog    | 001669 |
|       |                          |         |        | Cone-rod dystroph dog     | 001674 |
| CNVR6 | chr6:116288145-117571225 | ZFYVE28 | 0.0181 |                           |        |
| CNVR6 | chr6:116288145-117571225 | CFAP99  | 0.0181 |                           |        |
| CNVR9 | chr14:80740427-81602889  | TOP1MT  | 0.0173 |                           |        |
| CNVR9 | chr14:80740427-81602889  | RHPN1   | 0.0173 |                           |        |
| CNVR9 | chr14:80740427-81602889  | MAFA    | 0.0173 |                           |        |
| CNVR9 | chr14:80740427-81602889  | ZC3H3   | 0.0173 |                           |        |
| CNVR9 | chr14:80740427-81602889  | MROH6   | 0.0173 |                           |        |
| CNVR9 | chr14:80740427-81602889  | EEF1D   | 0.0173 |                           |        |
| CNVR9 | chr14:80740427-81602889  | TIGD5   | 0.0173 |                           |        |
| CNVR9 | chr14:80740427-81602889  | PYCR1   | 0.0173 |                           |        |
| CNVR9 | chr14:80740427-81602889  | TSTA3   | 0.0173 |                           |        |
| CNVR9 | chr14:80740427-81602889  | ZNF623  | 0.0173 |                           |        |
| CNVR9 | chr14:80740427-81602889  | CCDC166 | 0.0173 |                           |        |
| CNVR9 | chr14:80740427-81602889  | MAPK15  | 0.0173 |                           |        |
| CNVR9 | chr14:80740427-81602889  | PLEC    | 0.0173 | Epidermolysis bulli dog   | 002080 |
| CNVR9 | chr14:80740427-81602889  | PARP10  | 0.0173 |                           |        |
| CNVR9 | chr14:80740427-81602889  | GRINA   | 0.0173 |                           |        |
| CNVR9 | chr14:80740427-81602889  | SPATC1  | 0.0173 |                           |        |
| CNVR9 | chr14:80740427-81602889  | SMPD5   | 0.0173 |                           |        |
| CNVR9 | chr14:80740427-81602889  | OPLAH   | 0.0173 |                           |        |
| CNVR9 | chr14:80740427-81602889  | EXOSC4  | 0.0173 | Abortion (embryor cattle  | 002042 |
| CNVR9 | chr14:80740427-81602889  | GPAA1   | 0.0173 |                           |        |
| CNVR9 | chr14:80740427-81602889  | SHARPIN | 0.0173 |                           |        |
| CNVR9 | chr14:80740427-81602889  | MAF1    | 0.0173 |                           |        |
| CNVR9 | chr14:80740427-81602889  | WDR97   | 0.0173 |                           |        |
| CNVR9 | chr14:80740427-81602889  | MROH1   | 0.0173 |                           |        |
| CNVR9 | chr14:80740427-81602889  | BOP1    | 0.0173 |                           |        |
| CNVR9 | chr14:80740427-81602889  | SCX     | 0.0173 |                           |        |
| CNVR9 | chr14:80740427-81602889  | HSF1    | 0.0173 |                           |        |
| CNVR9 | chr14:80740427-81602889  | DGAT1   | 0.0173 |                           |        |
| CNVR9 | chr14:80740427-81602889  | SCRT1   | 0.0173 |                           |        |
| CNVR9 | chr14:80740427-81602889  | TMEM249 | 0.0173 |                           |        |
| CNVR9 | chr14:80740427-81602889  | FBXL6   | 0.0173 |                           |        |
| CNVR9 | chr14:80740427-81602889  | SLC52A2 | 0.0173 |                           |        |
| CNVR9 | chr14:80740427-81602889  | ADCK5   | 0.0173 |                           |        |
| CNVR9 | chr14:80740427-81602889  | CPSF1   | 0.0173 |                           |        |
| CNVR9 | chr14:80740427-81602889  | SLC39A4 | 0.0173 | Acrodermatitis ent cattle | 000593 |
| CNVR9 | chr14:80740427-81602889  | VPS28   | 0.0173 |                           |        |
| CNVR9 | chr14:80740427-81602889  | TONSL   | 0.0173 |                           |        |

|        |                         |          |        |                          |        |
|--------|-------------------------|----------|--------|--------------------------|--------|
| CNVR9  | chr14:80740427-81602889 | CYHR1    | 0.0173 |                          |        |
| CNVR9  | chr14:80740427-81602889 | KIFC2    | 0.0173 |                          |        |
| CNVR9  | chr14:80740427-81602889 | FOXH1    | 0.0173 |                          |        |
| CNVR9  | chr14:80740427-81602889 | PPP1R16A | 0.0173 |                          |        |
| CNVR9  | chr14:80740427-81602889 | GPT      | 0.0173 |                          |        |
| CNVR9  | chr14:80740427-81602889 | MFSD3    | 0.0173 |                          |        |
| CNVR9  | chr14:80740427-81602889 | RECQL4   | 0.0173 |                          |        |
| CNVR9  | chr14:80740427-81602889 | LRRC14   | 0.0173 |                          |        |
| CNVR9  | chr14:80740427-81602889 | LRRC24   | 0.0173 |                          |        |
| CNVR9  | chr14:80740427-81602889 | ARHGAP39 | 0.0173 |                          |        |
| CNVR9  | chr14:80740427-81602889 | COMMD5   | 0.0173 |                          |        |
| CNVR9  | chr14:80740427-81602889 | ZNF7     | 0.0173 |                          |        |
| CNVR5  | chr16:77668969-79353771 | ZNF281   | 0.0160 |                          |        |
| CNVR5  | chr16:77668969-79353771 | KIF14    | 0.0160 |                          |        |
| CNVR5  | chr16:77668969-79353771 | DDX59    | 0.0160 |                          |        |
| CNVR5  | chr16:77668969-79353771 | CAMSAP2  | 0.0160 |                          |        |
| CNVR5  | chr16:77668969-79353771 | GPR25    | 0.0160 |                          |        |
| CNVR5  | chr16:77668969-79353771 | CACNA1S  | 0.0160 |                          |        |
| CNVR5  | chr16:77668969-79353771 | ASCL5    | 0.0160 |                          |        |
| CNVR5  | chr16:77668969-79353771 | TMEM9    | 0.0160 |                          |        |
| CNVR5  | chr16:77668969-79353771 | IGFN1    | 0.0160 |                          |        |
| CNVR5  | chr16:77668969-79353771 | PKP1     | 0.0160 | Ectodermal dyspla dog    | 001864 |
| CNVR5  | chr16:77668969-79353771 | ADIPOR1  | 0.0160 |                          |        |
| CNVR5  | chr16:77668969-79353771 | KLHL12   | 0.0160 |                          |        |
| CNVR5  | chr16:77668969-79353771 | RAB1F    | 0.0160 |                          |        |
| CNVR5  | chr16:77668969-79353771 | KDM5B    | 0.0160 |                          |        |
| CNVR5  | chr16:77668969-79353771 | SYT2     | 0.0160 |                          |        |
| CNVR5  | chr16:77668969-79353771 | PPP1R12B | 0.0160 |                          |        |
| CNVR5  | chr16:77668969-79353771 | UBE2T    | 0.0160 |                          |        |
| CNVR5  | chr16:77668969-79353771 | LGR6     | 0.0160 |                          |        |
| CNVR5  | chr16:77668969-79353771 | PTPN7    | 0.0160 |                          |        |
| CNVR5  | chr16:77668969-79353771 | ARL8A    | 0.0160 |                          |        |
| CNVR5  | chr16:77668969-79353771 | GPR37L1  | 0.0160 |                          |        |
| CNVR5  | chr16:77668969-79353771 | NAV1     | 0.0160 |                          |        |
| CNVR5  | chr16:77668969-79353771 | IPO9     | 0.0160 |                          |        |
| CNVR5  | chr16:77668969-79353771 | LMOD1    | 0.0160 |                          |        |
| CNVR5  | chr16:77668969-79353771 | TIMM17A  | 0.0160 |                          |        |
| CNVR5  | chr16:77668969-79353771 | RNPEP    | 0.0160 |                          |        |
| CNVR5  | chr16:77668969-79353771 | ELF3     | 0.0160 |                          |        |
| CNVR5  | chr16:77668969-79353771 | CSRP1    | 0.0160 |                          |        |
| CNVR5  | chr16:77668969-79353771 | PHLDA3   | 0.0160 |                          |        |
| CNVR5  | chr16:77668969-79353771 | TNNI1    | 0.0160 |                          |        |
| CNVR5  | chr16:77668969-79353771 | LAD1     | 0.0160 |                          |        |
| CNVR5  | chr16:77668969-79353771 | TNNT2    | 0.0160 | Cardiomyopathy, c turkey | 000162 |
| CNVR11 | chr26:58230-1314865     | ADGRA1   | 0.0114 |                          |        |
| CNVR11 | chr26:58230-1314865     | CFAP46   | 0.0114 |                          |        |
| CNVR11 | chr26:58230-1314865     | INPP5A   | 0.0114 |                          |        |
| CNVR11 | chr26:58230-1314865     | PWWP2B   | 0.0114 |                          |        |

|        |                           |         |        |
|--------|---------------------------|---------|--------|
| CNVR11 | chr26:58230-1314865       | LRRC27  | 0.0114 |
| CNVR11 | chr26:58230-1314865       | STK32C  | 0.0114 |
| CNVR11 | chr26:58230-1314865       | DPYSL4  | 0.0114 |
| CNVR11 | chr26:58230-1314865       | JAKMIP3 | 0.0114 |
| CNVR11 | chr26:58230-1314865       | BNIP3   | 0.0114 |
| CNVR11 | chr26:58230-1314865       | MTG1    | 0.0114 |
| CNVR11 | chr26:58230-1314865       | PAOX    | 0.0114 |
| CNVR11 | chr26:58230-1314865       | ECHS1   | 0.0114 |
| CNVR11 | chr26:58230-1314865       | FUOM    | 0.0114 |
| CNVR11 | chr26:58230-1314865       | PRAP1   | 0.0114 |
| CNVR11 | chr26:58230-1314865       | CALY    | 0.0114 |
| CNVR11 | chr26:58230-1314865       | ZNF511  | 0.0114 |
| CNVR11 | chr26:58230-1314865       | TUBGCP2 | 0.0114 |
| CNVR11 | chr26:58230-1314865       | ADAM8   | 0.0114 |
| CNVR11 | chr26:58230-1314865       | UTF1    | 0.0114 |
| CNVR11 | chr26:58230-1314865       | KNDC1   | 0.0114 |
| CNVR15 | chr1:150457042-150859489  | KCNJ15  | 0.0087 |
| CNVR15 | chr1:150457042-150859489  | ERG     | 0.0087 |
| CNVR14 | chr11:105299562-106216293 | RXRA    | 0.0087 |
| CNVR14 | chr11:105299562-106216293 | CACNA1B | 0.0087 |
| CNVR14 | chr11:105299562-106216293 | EHMT1   | 0.0087 |
| CNVR14 | chr11:105299562-106216293 | ARRDC1  | 0.0087 |
| CNVR14 | chr11:105299562-106216293 | ZMYND19 | 0.0087 |
| CNVR14 | chr11:105299562-106216293 | DPH7    | 0.0087 |
| CNVR14 | chr11:105299562-106216293 | MRPL41  | 0.0087 |
| CNVR14 | chr11:105299562-106216293 | PNPLA7  | 0.0087 |
| CNVR14 | chr11:105299562-106216293 | NSMF    | 0.0087 |
| CNVR14 | chr11:105299562-106216293 | ENTPD8  | 0.0087 |
| CNVR14 | chr11:105299562-106216293 | NOXA1   | 0.0087 |
| CNVR14 | chr11:105299562-106216293 | EXD3    | 0.0087 |
| CNVR14 | chr11:105299562-106216293 | NRARP   | 0.0087 |
| CNVR14 | chr11:105299562-106216293 | TOR4A   | 0.0087 |
| CNVR14 | chr11:105299562-106216293 | NELFB   | 0.0087 |
| CNVR14 | chr11:105299562-106216293 | STPG3   | 0.0087 |
| CNVR14 | chr11:105299562-106216293 | FAM166A | 0.0087 |
| CNVR14 | chr11:105299562-106216293 | TUBB4B  | 0.0087 |
| CNVR14 | chr11:105299562-106216293 | SLC34A3 | 0.0087 |
| CNVR14 | chr11:105299562-106216293 | CYSRT1  | 0.0087 |
| CNVR14 | chr11:105299562-106216293 | RNF208  | 0.0087 |
| CNVR14 | chr11:105299562-106216293 | NDOR1   | 0.0087 |
| CNVR14 | chr11:105299562-106216293 | TMEM203 | 0.0087 |
| CNVR14 | chr11:105299562-106216293 | TPRN    | 0.0087 |
| CNVR14 | chr11:105299562-106216293 | SSNA1   | 0.0087 |
| CNVR14 | chr11:105299562-106216293 | ANAPC2  | 0.0087 |
| CNVR14 | chr11:105299562-106216293 | TMEM210 | 0.0087 |
| CNVR14 | chr11:105299562-106216293 | LRRC26  | 0.0087 |
| CNVR14 | chr11:105299562-106216293 | GRIN1   | 0.0087 |
| CNVR14 | chr11:105299562-106216293 | DPP7    | 0.0087 |

|        |                           |          |        |
|--------|---------------------------|----------|--------|
| CNVR14 | chr11:105299562-106216293 | UAP1L1   | 0.0087 |
| CNVR14 | chr11:105299562-106216293 | SAPCD2   | 0.0087 |
| CNVR14 | chr11:105299562-106216293 | ENTPD2   | 0.0087 |
| CNVR14 | chr11:105299562-106216293 | NPDC1    | 0.0087 |
| CNVR14 | chr11:105299562-106216293 | FUT7     | 0.0087 |
| CNVR14 | chr11:105299562-106216293 | ABCA2    | 0.0087 |
| CNVR13 | chr22:58520379-60193667   | EFCC1    | 0.0080 |
| CNVR13 | chr22:58520379-60193667   | GP9      | 0.0080 |
| CNVR13 | chr22:58520379-60193667   | RAB43    | 0.0080 |
| CNVR13 | chr22:58520379-60193667   | CNBP     | 0.0080 |
| CNVR13 | chr22:58520379-60193667   | COPG1    | 0.0080 |
| CNVR13 | chr22:58520379-60193667   | HMCES    | 0.0080 |
| CNVR13 | chr22:58520379-60193667   | RAB7A    | 0.0080 |
| CNVR13 | chr22:58520379-60193667   | RPN1     | 0.0080 |
| CNVR13 | chr22:58520379-60193667   | GATA2    | 0.0080 |
| CNVR13 | chr22:58520379-60193667   | EEFSEC   | 0.0080 |
| CNVR13 | chr22:58520379-60193667   | RUVBL1   | 0.0080 |
| CNVR13 | chr22:58520379-60193667   | SEC61A1  | 0.0080 |
| CNVR13 | chr22:58520379-60193667   | KBTBD12  | 0.0080 |
| CNVR13 | chr22:58520379-60193667   | MGLL     | 0.0080 |
| CNVR13 | chr22:58520379-60193667   | ABTB1    | 0.0080 |
| CNVR13 | chr22:58520379-60193667   | PLXNA1   | 0.0080 |
| CNVR13 | chr22:58520379-60193667   | CHCHD6   | 0.0080 |
| CNVR13 | chr22:58520379-60193667   | TXNRD3   | 0.0080 |
| CNVR13 | chr22:58520379-60193667   | CHST13   | 0.0080 |
| CNVR13 | chr22:58520379-60193667   | UROC1    | 0.0080 |
| CNVR13 | chr22:58520379-60193667   | ZXDC     | 0.0080 |
| CNVR13 | chr22:58520379-60193667   | SLC41A3  | 0.0080 |
| CNVR13 | chr22:58520379-60193667   | ALDH1L1  | 0.0080 |
| CNVR13 | chr22:58520379-60193667   | NUP210   | 0.0080 |
| CNVR13 | chr22:58520379-60193667   | IQSEC1   | 0.0080 |
| CNVR13 | chr22:58520379-60193667   | ACAD9    | 0.0080 |
| CNVR13 | chr22:58520379-60193667   | KIAA1257 | 0.0080 |
| CNVR10 | chr25:41347812-42840304   | CARD11   | 0.0071 |
| CNVR10 | chr25:41347812-42840304   | GNA12    | 0.0071 |
| CNVR10 | chr25:41347812-42840304   | AMZ1     | 0.0071 |
| CNVR10 | chr25:41347812-42840304   | BRAT1    | 0.0071 |
| CNVR10 | chr25:41347812-42840304   | IQCE     | 0.0071 |
| CNVR10 | chr25:41347812-42840304   | TTYH3    | 0.0071 |
| CNVR10 | chr25:41347812-42840304   | LFNG     | 0.0071 |
| CNVR10 | chr25:41347812-42840304   | GRIFIN   | 0.0071 |
| CNVR10 | chr25:41347812-42840304   | CHST12   | 0.0071 |
| CNVR10 | chr25:41347812-42840304   | EIF3B    | 0.0071 |
| CNVR10 | chr25:41347812-42840304   | SNX8     | 0.0071 |
| CNVR10 | chr25:41347812-42840304   | NUDT1    | 0.0071 |
| CNVR10 | chr25:41347812-42840304   | MRM2     | 0.0071 |
| CNVR10 | chr25:41347812-42840304   | GPR146   | 0.0071 |
| CNVR10 | chr25:41347812-42840304   | PRKAR1B  | 0.0071 |

|        |                          |          |        |                                |                    |
|--------|--------------------------|----------|--------|--------------------------------|--------------------|
| CNVR10 | chr25:41347812-42840304  | PDGFA    | 0.0071 |                                |                    |
| CNVR10 | chr25:41347812-42840304  | FAM20C   | 0.0071 | Dental hypominer: dog          | 002015             |
| CNVR10 | chr25:41347812-42840304  | MAD1L1   | 0.0071 |                                |                    |
| CNVR10 | chr25:41347812-42840304  | UNCX     | 0.0071 |                                |                    |
| CNVR10 | chr25:41347812-42840304  | ZFAND2A  | 0.0071 |                                |                    |
| CNVR10 | chr25:41347812-42840304  | SUN1     | 0.0071 |                                |                    |
| CNVR10 | chr25:41347812-42840304  | GET4     | 0.0071 |                                |                    |
| CNVR10 | chr25:41347812-42840304  | GPER1    | 0.0071 |                                |                    |
| CNVR12 | chr8:111379886-112591717 | MYT1L    | 0.0065 |                                |                    |
| CNVR12 | chr8:111379886-112591717 | PXDN     | 0.0065 |                                |                    |
| CNVR12 | chr8:111379886-112591717 | TPO      | 0.0065 | Hypothyroidism                 | domestic c. 000536 |
| CNVR12 | chr8:111379886-112591717 | SNTG2    | 0.0065 |                                |                    |
| CNVR12 | chr8:111379886-112591717 | TMEM18   | 0.0065 |                                |                    |
| CNVR12 | chr8:111379886-112591717 | FAM150B  | 0.0065 |                                |                    |
| CNVR12 | chr8:111379886-112591717 | ACP1     | 0.0065 |                                |                    |
| CNVR12 | chr8:111379886-112591717 | SH3YL1   | 0.0065 |                                |                    |
| CNVR17 | chr19:61491917-62508113  | PRKCA    | 0.0062 |                                |                    |
| CNVR17 | chr19:61491917-62508113  | CACNG5   | 0.0062 |                                |                    |
| CNVR17 | chr19:61491917-62508113  | CACNG4   | 0.0062 |                                |                    |
| CNVR17 | chr19:61491917-62508113  | CACNG1   | 0.0062 |                                |                    |
| CNVR17 | chr19:61491917-62508113  | HELZ     | 0.0062 |                                |                    |
| CNVR17 | chr19:61491917-62508113  | CEP112   | 0.0062 |                                |                    |
| CNVR17 | chr19:61491917-62508113  | APOH     | 0.0062 |                                |                    |
| CNVR4  | chr13:63117523-63416183  | AHCY     | 0.0047 |                                |                    |
| CNVR4  | chr13:63117523-63416183  | ITCH     | 0.0047 |                                |                    |
| CNVR4  | chr13:63117523-63416183  | ASIP     | 0.0047 | Coat colour, agouti horse, cat | 000201             |
| CNVR33 | chr12:633392-1251586     | TEX29    | 0.0032 |                                |                    |
| CNVR33 | chr12:633392-1251586     | ARHGEF7  | 0.0032 |                                |                    |
| CNVR33 | chr12:633392-1251586     | ANKRD10  | 0.0032 |                                |                    |
| CNVR33 | chr12:633392-1251586     | ING1     | 0.0032 |                                |                    |
| CNVR33 | chr12:633392-1251586     | CARS2    | 0.0032 |                                |                    |
| CNVR33 | chr12:633392-1251586     | NAXD     | 0.0032 |                                |                    |
| CNVR33 | chr12:633392-1251586     | RAB20    | 0.0032 |                                |                    |
| CNVR33 | chr12:633392-1251586     | COL4A2   | 0.0032 |                                |                    |
| CNVR22 | chr9:90879554-91536616   | PHF10    | 0.0032 |                                |                    |
| CNVR22 | chr9:90879554-91536616   | TCTE3    | 0.0032 |                                |                    |
| CNVR22 | chr9:90879554-91536616   | ERMARD   | 0.0032 |                                |                    |
| CNVR22 | chr9:90879554-91536616   | DLL1     | 0.0032 |                                |                    |
| CNVR22 | chr9:90879554-91536616   | FAM120B  | 0.0032 |                                |                    |
| CNVR22 | chr9:90879554-91536616   | PSMB1    | 0.0032 |                                |                    |
| CNVR22 | chr9:90879554-91536616   | WDR27    | 0.0032 |                                |                    |
| CNVR18 | chr5:75604240-77148831   | PKP2     | 0.0031 |                                |                    |
| CNVR18 | chr5:75604240-77148831   | YARS2    | 0.0031 |                                |                    |
| CNVR18 | chr5:75604240-77148831   | DNM1L    | 0.0031 |                                |                    |
| CNVR18 | chr5:75604240-77148831   | FGD4     | 0.0031 |                                |                    |
| CNVR18 | chr5:75604240-77148831   | BICD1    | 0.0031 |                                |                    |
| CNVR18 | chr5:75604240-77148831   | KIAA1551 | 0.0031 |                                |                    |
| CNVR18 | chr5:75604240-77148831   | AMN1     | 0.0031 |                                |                    |

|        |                          |         |        |                      |        |        |
|--------|--------------------------|---------|--------|----------------------|--------|--------|
| CNVR18 | chr5:75604240-77148831   | ETFBKMT | 0.0031 |                      |        |        |
| CNVR18 | chr5:75604240-77148831   | DENND5B | 0.0031 |                      |        |        |
| CNVR29 | chr6:114348987-116039905 | SLBP    | 0.0030 |                      |        |        |
| CNVR29 | chr6:114348987-116039905 | TMEM129 | 0.0030 |                      |        |        |
| CNVR29 | chr6:114348987-116039905 | AFAP1   | 0.0030 |                      |        |        |
| CNVR29 | chr6:114348987-116039905 | ABLIM2  | 0.0030 |                      |        |        |
| CNVR29 | chr6:114348987-116039905 | SH3TC1  | 0.0030 |                      |        |        |
| CNVR29 | chr6:114348987-116039905 | HTRA3   | 0.0030 |                      |        |        |
| CNVR29 | chr6:114348987-116039905 | ACOX3   | 0.0030 |                      |        |        |
| CNVR29 | chr6:114348987-116039905 | LRPAP1  | 0.0030 |                      |        |        |
| CNVR29 | chr6:114348987-116039905 | RGS12   | 0.0030 |                      |        |        |
| CNVR29 | chr6:114348987-116039905 | HGFAC   | 0.0030 |                      |        |        |
| CNVR29 | chr6:114348987-116039905 | DOK7    | 0.0030 |                      |        |        |
| CNVR29 | chr6:114348987-116039905 | TACC3   | 0.0030 |                      |        |        |
| CNVR29 | chr6:114348987-116039905 | LETM1   | 0.0030 |                      |        |        |
| CNVR29 | chr6:114348987-116039905 | WHSC1   | 0.0030 |                      |        |        |
| CNVR29 | chr6:114348987-116039905 | NELFA   | 0.0030 |                      |        |        |
| CNVR29 | chr6:114348987-116039905 | NAT8L   | 0.0030 |                      |        |        |
| CNVR29 | chr6:114348987-116039905 | TRMT44  | 0.0030 |                      |        |        |
| CNVR29 | chr6:114348987-116039905 | CPZ     | 0.0030 |                      |        |        |
| CNVR29 | chr6:114348987-116039905 | HMX1    | 0.0030 | Ears, crop           | cattle | 000317 |
| CNVR29 | chr6:114348987-116039905 | ADRA2C  | 0.0030 |                      |        |        |
| CNVR36 | chr23:185718-1440908     | IRF4    | 0.0024 |                      |        |        |
| CNVR36 | chr23:185718-1440908     | EXOC2   | 0.0024 |                      |        |        |
| CNVR36 | chr23:185718-1440908     | FOXQ1   | 0.0024 |                      |        |        |
| CNVR36 | chr23:185718-1440908     | FOXF2   | 0.0024 |                      |        |        |
| CNVR36 | chr23:185718-1440908     | FOXC1   | 0.0024 |                      |        |        |
| CNVR36 | chr23:185718-1440908     | GMDS    | 0.0024 |                      |        |        |
| CNVR36 | chr23:185718-1440908     | MYLK4   | 0.0024 |                      |        |        |
| CNVR30 | chr21:68219498-68844436  | TMEM179 | 0.0020 |                      |        |        |
| CNVR30 | chr21:68219498-68844436  | BRF1    | 0.0020 |                      |        |        |
| CNVR30 | chr21:68219498-68844436  | BTBD6   | 0.0020 |                      |        |        |
| CNVR30 | chr21:68219498-68844436  | NUDT14  | 0.0020 |                      |        |        |
| CNVR30 | chr21:68219498-68844436  | TEX22   | 0.0020 |                      |        |        |
| CNVR30 | chr21:68219498-68844436  | ADSSL1  | 0.0020 |                      |        |        |
| CNVR30 | chr21:68219498-68844436  | SIVA1   | 0.0020 |                      |        |        |
| CNVR30 | chr21:68219498-68844436  | AKT1    | 0.0020 |                      |        |        |
| CNVR30 | chr21:68219498-68844436  | ZBTB42  | 0.0020 |                      |        |        |
| CNVR30 | chr21:68219498-68844436  | CEP170B | 0.0020 |                      |        |        |
| CNVR30 | chr21:68219498-68844436  | PLD4    | 0.0020 | Zinc deficiency-like | cattle | 001935 |
| CNVR30 | chr21:68219498-68844436  | AHNAK2  | 0.0020 |                      |        |        |
| CNVR30 | chr21:68219498-68844436  | CDCA4   | 0.0020 |                      |        |        |
| CNVR31 | chr13:82673905-83017136  | CBLN4   | 0.0019 |                      |        |        |
| CNVR28 | chr29:50937615-51309969  | DUSP8   | 0.0018 |                      |        |        |
| CNVR28 | chr29:50937615-51309969  | BRSK2   | 0.0018 |                      |        |        |
| CNVR28 | chr29:50937615-51309969  | TOLLIP  | 0.0018 |                      |        |        |
| CNVR28 | chr29:50937615-51309969  | MUC5AC  | 0.0018 |                      |        |        |
| CNVR42 | chr15:80227503-81898682  | GRIA4   | 0.0018 |                      |        |        |

|         |                          |           |        |                         |        |
|---------|--------------------------|-----------|--------|-------------------------|--------|
| CNVR42  | chr15:80227503-81898682  | MSANTD4   | 0.0018 |                         |        |
| CNVR42  | chr15:80227503-81898682  | KBTBD3    | 0.0018 |                         |        |
| CNVR42  | chr15:80227503-81898682  | AASDHPPT  | 0.0018 |                         |        |
| CNVR42  | chr15:80227503-81898682  | ANKRD49   | 0.0018 |                         |        |
| CNVR42  | chr15:80227503-81898682  | MRE11A    | 0.0018 |                         |        |
| CNVR42  | chr15:80227503-81898682  | GPR83     | 0.0018 |                         |        |
| CNVR42  | chr15:80227503-81898682  | NANOG     | 0.0018 |                         |        |
| CNVR19  | chr24:59148115-59684957  | MC4R      | 0.0017 |                         |        |
| CNVR26  | chr3:95491550-95583652   | SPAG17    | 0.0017 |                         |        |
| CNVR40  | chr1:156930272-157299677 | EFHB      | 0.0015 |                         |        |
| CNVR40  | chr1:156930272-157299677 | RAB5A     | 0.0015 |                         |        |
| CNVR40  | chr1:156930272-157299677 | PP2D1     | 0.0015 |                         |        |
| CNVR40  | chr1:156930272-157299677 | KAT2B     | 0.0015 |                         |        |
| CNVR40  | chr1:156930272-157299677 | SGO1      | 0.0015 |                         |        |
| CNVR219 | chr3:107834318-108367299 | CD1E      | 0.0015 |                         |        |
| CNVR186 | chr15:26559078-26705819  | ACER3     | 0.0014 |                         |        |
| CNVR155 | chr17:56678966-57448926  | FREM3     | 0.0014 |                         |        |
| CNVR155 | chr17:56678966-57448926  | HHIP      | 0.0014 |                         |        |
| CNVR35  | chr14:94209873-94652327  | KCNQ5     | 0.0014 |                         |        |
| CNVR35  | chr14:94209873-94652327  | KHDC3L    | 0.0014 |                         |        |
| CNVR35  | chr14:94209873-94652327  | DDX43     | 0.0014 |                         |        |
| CNVR55  | chr14:78440252-79000166  | KCNK9     | 0.0013 |                         |        |
| CNVR55  | chr14:78440252-79000166  | TRAPPC9   | 0.0013 |                         |        |
| CNVR55  | chr14:78440252-79000166  | CHRA1     | 0.0013 |                         |        |
| CNVR55  | chr14:78440252-79000166  | AGO2      | 0.0013 |                         |        |
| CNVR3   | chr12:13172367-13621196  | DNAJC3    | 0.0013 |                         |        |
| CNVR3   | chr12:13172367-13621196  | DZIP1     | 0.0013 |                         |        |
| CNVR3   | chr12:13172367-13621196  | CLDN10    | 0.0013 |                         |        |
| CNVR68  | chr27:43083425-43632992  | MYOM2     | 0.0013 |                         |        |
| CNVR68  | chr27:43083425-43632992  | KBTBD11   | 0.0013 |                         |        |
| CNVR68  | chr27:43083425-43632992  | ARHGEF10  | 0.0013 | Polyneuropathy, A dog   | 001917 |
| CNVR68  | chr27:43083425-43632992  | CLN8      | 0.0013 | Neuronal ceroid liğ dog | 001506 |
| CNVR68  | chr27:43083425-43632992  | DLGAP2    | 0.0013 |                         |        |
| CNVR39  | chr25:218326-1683430     | PDIA2     | 0.0010 |                         |        |
| CNVR39  | chr25:218326-1683430     | AXIN1     | 0.0010 |                         |        |
| CNVR39  | chr25:218326-1683430     | MRPL28    | 0.0010 |                         |        |
| CNVR39  | chr25:218326-1683430     | TMEM8A    | 0.0010 |                         |        |
| CNVR39  | chr25:218326-1683430     | NME4      | 0.0010 |                         |        |
| CNVR39  | chr25:218326-1683430     | DECR2     | 0.0010 |                         |        |
| CNVR39  | chr25:218326-1683430     | RAB11FIP3 | 0.0010 |                         |        |
| CNVR39  | chr25:218326-1683430     | CAPN15    | 0.0010 |                         |        |
| CNVR39  | chr25:218326-1683430     | PRR35     | 0.0010 |                         |        |
| CNVR39  | chr25:218326-1683430     | NHLRC4    | 0.0010 |                         |        |
| CNVR39  | chr25:218326-1683430     | PIGQ      | 0.0010 |                         |        |
| CNVR39  | chr25:218326-1683430     | RAB40C    | 0.0010 |                         |        |
| CNVR39  | chr25:218326-1683430     | WFIKKN1   | 0.0010 |                         |        |
| CNVR39  | chr25:218326-1683430     | METTL26   | 0.0010 |                         |        |
| CNVR39  | chr25:218326-1683430     | MCRIP2    | 0.0010 |                         |        |



|        |                      |          |        |            |        |        |
|--------|----------------------|----------|--------|------------|--------|--------|
| CNVR39 | chr25:218326-1683430 | WDR90    | 0.0010 |            |        |        |
| CNVR39 | chr25:218326-1683430 | RHOT2    | 0.0010 |            |        |        |
| CNVR39 | chr25:218326-1683430 | RHBDL1   | 0.0010 |            |        |        |
| CNVR39 | chr25:218326-1683430 | STUB1    | 0.0010 |            |        |        |
| CNVR39 | chr25:218326-1683430 | JMJD8    | 0.0010 |            |        |        |
| CNVR39 | chr25:218326-1683430 | WDR24    | 0.0010 |            |        |        |
| CNVR39 | chr25:218326-1683430 | FBXL16   | 0.0010 |            |        |        |
| CNVR39 | chr25:218326-1683430 | METRNL   | 0.0010 |            |        |        |
| CNVR39 | chr25:218326-1683430 | FAM173A  | 0.0010 |            |        |        |
| CNVR39 | chr25:218326-1683430 | CCDC78   | 0.0010 |            |        |        |
| CNVR39 | chr25:218326-1683430 | HAGHL    | 0.0010 |            |        |        |
| CNVR39 | chr25:218326-1683430 | NARFL    | 0.0010 |            |        |        |
| CNVR39 | chr25:218326-1683430 | MSLN     | 0.0010 |            |        |        |
| CNVR39 | chr25:218326-1683430 | RPUSD1   | 0.0010 |            |        |        |
| CNVR39 | chr25:218326-1683430 | CHTF18   | 0.0010 |            |        |        |
| CNVR39 | chr25:218326-1683430 | GNG13    | 0.0010 |            |        |        |
| CNVR39 | chr25:218326-1683430 | LMF1     | 0.0010 |            |        |        |
| CNVR39 | chr25:218326-1683430 | SOX8     | 0.0010 |            |        |        |
| CNVR39 | chr25:218326-1683430 | SSTR5    | 0.0010 |            |        |        |
| CNVR39 | chr25:218326-1683430 | C1QTNF8  | 0.0010 |            |        |        |
| CNVR39 | chr25:218326-1683430 | UBE2I    | 0.0010 |            |        |        |
| CNVR39 | chr25:218326-1683430 | BAIAP3   | 0.0010 |            |        |        |
| CNVR39 | chr25:218326-1683430 | TSR3     | 0.0010 |            |        |        |
| CNVR39 | chr25:218326-1683430 | GNPTG    | 0.0010 |            |        |        |
| CNVR39 | chr25:218326-1683430 | UNKL     | 0.0010 |            |        |        |
| CNVR39 | chr25:218326-1683430 | CCDC154  | 0.0010 |            |        |        |
| CNVR39 | chr25:218326-1683430 | HMX1     | 0.0010 | Ears, crop | cattle | 000317 |
| CNVR39 | chr25:218326-1683430 | PTX4     | 0.0010 |            |        |        |
| CNVR39 | chr25:218326-1683430 | TELO2    | 0.0010 |            |        |        |
| CNVR39 | chr25:218326-1683430 | IFT140   | 0.0010 |            |        |        |
| CNVR39 | chr25:218326-1683430 | TMEM204  | 0.0010 |            |        |        |
| CNVR39 | chr25:218326-1683430 | HN1L     | 0.0010 |            |        |        |
| CNVR39 | chr25:218326-1683430 | MAPK8IP3 | 0.0010 |            |        |        |
| CNVR39 | chr25:218326-1683430 | NME3     | 0.0010 |            |        |        |
| CNVR39 | chr25:218326-1683430 | MRPS34   | 0.0010 |            |        |        |
| CNVR39 | chr25:218326-1683430 | EME2     | 0.0010 |            |        |        |
| CNVR39 | chr25:218326-1683430 | SPSB3    | 0.0010 |            |        |        |
| CNVR39 | chr25:218326-1683430 | NUBP2    | 0.0010 |            |        |        |
| CNVR39 | chr25:218326-1683430 | IGFALS   | 0.0010 |            |        |        |
| CNVR39 | chr25:218326-1683430 | HAGH     | 0.0010 |            |        |        |
| CNVR39 | chr25:218326-1683430 | FAHD1    | 0.0010 |            |        |        |
| CNVR39 | chr25:218326-1683430 | MEIOB    | 0.0010 |            |        |        |
| CNVR39 | chr25:218326-1683430 | HS3ST6   | 0.0010 |            |        |        |
| CNVR39 | chr25:218326-1683430 | MSRB1    | 0.0010 |            |        |        |
| CNVR39 | chr25:218326-1683430 | RPL3L    | 0.0010 |            |        |        |
| CNVR39 | chr25:218326-1683430 | NDUFB10  | 0.0010 |            |        |        |
| CNVR39 | chr25:218326-1683430 | RPS2     | 0.0010 |            |        |        |
| CNVR39 | chr25:218326-1683430 | RNF151   | 0.0010 |            |        |        |

|         |                          |          |        |                                        |
|---------|--------------------------|----------|--------|----------------------------------------|
| CNVR39  | chr25:218326-1683430     | TBL3     | 0.0010 |                                        |
| CNVR39  | chr25:218326-1683430     | NOXO1    | 0.0010 |                                        |
| CNVR39  | chr25:218326-1683430     | GFER     | 0.0010 |                                        |
| CNVR39  | chr25:218326-1683430     | SYNGR3   | 0.0010 |                                        |
| CNVR39  | chr25:218326-1683430     | ZNF598   | 0.0010 |                                        |
| CNVR39  | chr25:218326-1683430     | NPW      | 0.0010 |                                        |
| CNVR39  | chr25:218326-1683430     | SLC9A3R2 | 0.0010 |                                        |
| CNVR39  | chr25:218326-1683430     | NTHL1    | 0.0010 |                                        |
| CNVR39  | chr25:218326-1683430     | TSC2     | 0.0010 |                                        |
| CNVR39  | chr25:218326-1683430     | PKD1     | 0.0010 | Polycystic kidney d domestic c: 000807 |
| CNVR39  | chr25:218326-1683430     | RAB26    | 0.0010 |                                        |
| CNVR39  | chr25:218326-1683430     | TRAF7    | 0.0010 |                                        |
| CNVR39  | chr25:218326-1683430     | CASKIN1  | 0.0010 |                                        |
| CNVR39  | chr25:218326-1683430     | MLST8    | 0.0010 |                                        |
| CNVR39  | chr25:218326-1683430     | BRICD5   | 0.0010 |                                        |
| CNVR39  | chr25:218326-1683430     | PGP      | 0.0010 |                                        |
| CNVR39  | chr25:218326-1683430     | E4F1     | 0.0010 |                                        |
| CNVR39  | chr25:218326-1683430     | DNASE1L2 | 0.0010 |                                        |
| CNVR39  | chr25:218326-1683430     | ECI1     | 0.0010 |                                        |
| CNVR39  | chr25:218326-1683430     | RGS11    | 0.0010 |                                        |
| CNVR39  | chr25:218326-1683430     | ARHGDI3  | 0.0010 |                                        |
| CNVR159 | chr9:14843604-15334673   | TRDN     | 0.0010 |                                        |
| CNVR48  | chr5:117814803-118948578 | ODF3B    | 0.0009 |                                        |
| CNVR48  | chr5:117814803-118948578 | SYCE3    | 0.0009 |                                        |
| CNVR48  | chr5:117814803-118948578 | CPT1B    | 0.0009 |                                        |
| CNVR48  | chr5:117814803-118948578 | CHKB     | 0.0009 |                                        |
| CNVR48  | chr5:117814803-118948578 | MAPK8IP2 | 0.0009 |                                        |
| CNVR48  | chr5:117814803-118948578 | ARSA     | 0.0009 |                                        |
| CNVR48  | chr5:117814803-118948578 | SHANK3   | 0.0009 |                                        |
| CNVR48  | chr5:117814803-118948578 | BRD1     | 0.0009 |                                        |
| CNVR48  | chr5:117814803-118948578 | ZBED4    | 0.0009 |                                        |
| CNVR48  | chr5:117814803-118948578 | ALG12    | 0.0009 |                                        |
| CNVR48  | chr5:117814803-118948578 | PIM3     | 0.0009 |                                        |
| CNVR48  | chr5:117814803-118948578 | IL17REL  | 0.0009 |                                        |
| CNVR48  | chr5:117814803-118948578 | TTLL8    | 0.0009 |                                        |
| CNVR48  | chr5:117814803-118948578 | MLC1     | 0.0009 |                                        |
| CNVR48  | chr5:117814803-118948578 | MOV10L1  | 0.0009 |                                        |
| CNVR48  | chr5:117814803-118948578 | PANX2    | 0.0009 |                                        |
| CNVR48  | chr5:117814803-118948578 | TRABD    | 0.0009 |                                        |
| CNVR48  | chr5:117814803-118948578 | TUBGCP6  | 0.0009 |                                        |
| CNVR48  | chr5:117814803-118948578 | HDAC10   | 0.0009 |                                        |
| CNVR48  | chr5:117814803-118948578 | MAPK12   | 0.0009 |                                        |
| CNVR48  | chr5:117814803-118948578 | MAPK11   | 0.0009 |                                        |
| CNVR48  | chr5:117814803-118948578 | PPP6R2   | 0.0009 |                                        |
| CNVR48  | chr5:117814803-118948578 | DENND6B  | 0.0009 |                                        |
| CNVR48  | chr5:117814803-118948578 | ADM2     | 0.0009 |                                        |
| CNVR48  | chr5:117814803-118948578 | MIOX     | 0.0009 |                                        |
| CNVR48  | chr5:117814803-118948578 | LMF2     | 0.0009 |                                        |

|        |                          |          |        |
|--------|--------------------------|----------|--------|
| CNVR48 | chr5:117814803-118948578 | NCAPH2   | 0.0009 |
| CNVR61 | chr18:64541376-65168566  | TTYH1    | 0.0008 |
| CNVR61 | chr18:64541376-65168566  | LENG8    | 0.0008 |
| CNVR61 | chr18:64541376-65168566  | LENG9    | 0.0008 |
| CNVR61 | chr18:64541376-65168566  | CDC42EP5 | 0.0008 |
| CNVR61 | chr18:64541376-65168566  | RPS9     | 0.0008 |
| CNVR61 | chr18:64541376-65168566  | TSEN34   | 0.0008 |
| CNVR61 | chr18:64541376-65168566  | MBOAT7   | 0.0008 |
| CNVR61 | chr18:64541376-65168566  | TMC4     | 0.0008 |
| CNVR61 | chr18:64541376-65168566  | LENG1    | 0.0008 |
| CNVR61 | chr18:64541376-65168566  | CNOT3    | 0.0008 |
| CNVR61 | chr18:64541376-65168566  | PRPF31   | 0.0008 |
| CNVR61 | chr18:64541376-65168566  | TFPT     | 0.0008 |
| CNVR61 | chr18:64541376-65168566  | NDUFA3   | 0.0008 |
| CNVR61 | chr18:64541376-65168566  | OSCAR    | 0.0008 |
| CNVR61 | chr18:64541376-65168566  | NLRP13   | 0.0008 |
| CNVR61 | chr18:64541376-65168566  | NLRP8    | 0.0008 |
| CNVR61 | chr18:64541376-65168566  | NLRP5    | 0.0008 |
| CNVR61 | chr18:64541376-65168566  | ZNF787   | 0.0008 |
| CNVR61 | chr18:64541376-65168566  | ZNF444   | 0.0008 |
| CNVR61 | chr18:64541376-65168566  | ZNF667   | 0.0008 |
| CNVR61 | chr18:64541376-65168566  | LAIR1    | 0.0008 |
| CNVR54 | chr3:349016-1327111      | SEPT2    | 0.0008 |
| CNVR54 | chr3:349016-1327111      | HDLBP    | 0.0008 |
| CNVR54 | chr3:349016-1327111      | ANO7     | 0.0008 |
| CNVR54 | chr3:349016-1327111      | PPP1R7   | 0.0008 |
| CNVR54 | chr3:349016-1327111      | PASK     | 0.0008 |
| CNVR54 | chr3:349016-1327111      | MTERF4   | 0.0008 |
| CNVR54 | chr3:349016-1327111      | SNED1    | 0.0008 |
| CNVR54 | chr3:349016-1327111      | CROCC2   | 0.0008 |
| CNVR54 | chr3:349016-1327111      | AGXT     | 0.0008 |
| CNVR54 | chr3:349016-1327111      | KIF1A    | 0.0008 |
| CNVR54 | chr3:349016-1327111      | GPR35    | 0.0008 |
| CNVR54 | chr3:349016-1327111      | CAPN10   | 0.0008 |
| CNVR54 | chr3:349016-1327111      | RNPEPL1  | 0.0008 |
| CNVR54 | chr3:349016-1327111      | DUSP28   | 0.0008 |
| CNVR54 | chr3:349016-1327111      | ANKMY1   | 0.0008 |
| CNVR54 | chr3:349016-1327111      | GPC1     | 0.0008 |
| CNVR54 | chr3:349016-1327111      | ING5     | 0.0008 |
| CNVR54 | chr3:349016-1327111      | DTYMK    | 0.0008 |
| CNVR54 | chr3:349016-1327111      | ATG4B    | 0.0008 |
| CNVR54 | chr3:349016-1327111      | THAP4    | 0.0008 |
| CNVR54 | chr3:349016-1327111      | BOK      | 0.0008 |
| CNVR54 | chr3:349016-1327111      | STK25    | 0.0008 |
| CNVR54 | chr3:349016-1327111      | FARP2    | 0.0008 |
| CNVR79 | chr15:30844369-31003231  | PDE2A    | 0.0008 |
| CNVR79 | chr15:30844369-31003231  | VPS26B   | 0.0008 |
| CNVR79 | chr15:30844369-31003231  | THYN1    | 0.0008 |

|         |                          |          |        |                        |        |
|---------|--------------------------|----------|--------|------------------------|--------|
| CNVR79  | chr15:30844369-31003231  | ACAD8    | 0.0008 |                        |        |
| CNVR63  | chr21:66057376-67177748  | PPP2R5C  | 0.0008 |                        |        |
| CNVR63  | chr21:66057376-67177748  | DYNC1H1  | 0.0008 |                        |        |
| CNVR63  | chr21:66057376-67177748  | HSP90AA1 | 0.0008 |                        |        |
| CNVR63  | chr21:66057376-67177748  | WDR20    | 0.0008 |                        |        |
| CNVR63  | chr21:66057376-67177748  | MOK      | 0.0008 |                        |        |
| CNVR63  | chr21:66057376-67177748  | ZNF839   | 0.0008 |                        |        |
| CNVR63  | chr21:66057376-67177748  | CINP     | 0.0008 |                        |        |
| CNVR63  | chr21:66057376-67177748  | TECPR2   | 0.0008 | Neuroaxonal dyst dog   | 001975 |
| CNVR63  | chr21:66057376-67177748  | ANKRD9   | 0.0008 |                        |        |
| CNVR63  | chr21:66057376-67177748  | RCOR1    | 0.0008 |                        |        |
| CNVR63  | chr21:66057376-67177748  | TRAF3    | 0.0008 |                        |        |
| CNVR63  | chr21:66057376-67177748  | AMN      | 0.0008 | Intestinal cobalam dog | 000565 |
| CNVR63  | chr21:66057376-67177748  | CDC42BPB | 0.0008 |                        |        |
| CNVR63  | chr21:66057376-67177748  | EXOC3L4  | 0.0008 |                        |        |
| CNVR63  | chr21:66057376-67177748  | TNFAIP2  | 0.0008 |                        |        |
| CNVR25  | chr6:8614278-10000334    | TRAM1L1  | 0.0008 |                        |        |
| CNVR38  | chr4:115612273-115949298 | COBL     | 0.0008 |                        |        |
| CNVR44  | chr3:66098250-66718499   | KYAT3    | 0.0007 |                        |        |
| CNVR44  | chr3:66098250-66718499   | PKN2     | 0.0007 |                        |        |
| CNVR44  | chr3:66098250-66718499   | GTF2B    | 0.0007 |                        |        |
| CNVR222 | chr4:10648687-10757631   | CNTNAP2  | 0.0007 |                        |        |
| CNVR46  | chr24:220589-1103061     | PARD6G   | 0.0006 |                        |        |
| CNVR46  | chr24:220589-1103061     | ADNP2    | 0.0006 |                        |        |
| CNVR46  | chr24:220589-1103061     | RBFA     | 0.0006 |                        |        |
| CNVR46  | chr24:220589-1103061     | TXNL4A   | 0.0006 |                        |        |
| CNVR46  | chr24:220589-1103061     | HSBP1L1  | 0.0006 |                        |        |
| CNVR46  | chr24:220589-1103061     | PQLC1    | 0.0006 |                        |        |
| CNVR46  | chr24:220589-1103061     | KCNG2    | 0.0006 |                        |        |
| CNVR46  | chr24:220589-1103061     | CTDP1    | 0.0006 |                        |        |
| CNVR46  | chr24:220589-1103061     | NFATC1   | 0.0006 |                        |        |
| CNVR46  | chr24:220589-1103061     | ATP9B    | 0.0006 |                        |        |
| CNVR46  | chr24:220589-1103061     | SALL3    | 0.0006 |                        |        |
| CNVR92  | chr1:153745929-154192192 | PLCL2    | 0.0006 |                        |        |
| CNVR92  | chr1:153745929-154192192 | TBC1D5   | 0.0006 |                        |        |
| CNVR91  | chr18:66837266-67182157  | ZNF329   | 0.0006 |                        |        |
| CNVR91  | chr18:66837266-67182157  | ZNF274   | 0.0006 |                        |        |
| CNVR91  | chr18:66837266-67182157  | ZNF8     | 0.0006 |                        |        |
| CNVR91  | chr18:66837266-67182157  | ZNF584   | 0.0006 |                        |        |
| CNVR91  | chr18:66837266-67182157  | ZNF132   | 0.0006 |                        |        |
| CNVR91  | chr18:66837266-67182157  | ZNF446   | 0.0006 |                        |        |
| CNVR91  | chr18:66837266-67182157  | SLC27A5  | 0.0006 |                        |        |
| CNVR91  | chr18:66837266-67182157  | ZBTB45   | 0.0006 |                        |        |
| CNVR91  | chr18:66837266-67182157  | ZSCAN22  | 0.0006 |                        |        |
| CNVR91  | chr18:66837266-67182157  | A1BG     | 0.0006 |                        |        |
| CNVR91  | chr18:66837266-67182157  | RPS5     | 0.0006 |                        |        |
| CNVR91  | chr18:66837266-67182157  | RNF225   | 0.0006 |                        |        |
| CNVR27  | chr7:107678302-108372414 | RASGEF1C | 0.0006 |                        |        |

|         |                          |          |        |             |                   |
|---------|--------------------------|----------|--------|-------------|-------------------|
| CNVR27  | chr7:107678302-108372414 | MAPK9    | 0.0006 |             |                   |
| CNVR27  | chr7:107678302-108372414 | GFPT2    | 0.0006 |             |                   |
| CNVR27  | chr7:107678302-108372414 | CNOT6    | 0.0006 |             |                   |
| CNVR27  | chr7:107678302-108372414 | FLT4     | 0.0006 |             |                   |
| CNVR78  | chr29:48341041-48751981  | ANO1     | 0.0005 |             |                   |
| CNVR78  | chr29:48341041-48751981  | FADD     | 0.0005 |             |                   |
| CNVR78  | chr29:48341041-48751981  | PPFIA1   | 0.0005 |             |                   |
| CNVR78  | chr29:48341041-48751981  | CTTN     | 0.0005 |             |                   |
| CNVR78  | chr29:48341041-48751981  | SHANK2   | 0.0005 |             |                   |
| CNVR93  | chr29:49708126-49792624  | PHLDA2   | 0.0005 |             |                   |
| CNVR93  | chr29:49708126-49792624  | SLC22A18 | 0.0005 |             |                   |
| CNVR93  | chr29:49708126-49792624  | CDKN1C   | 0.0005 |             |                   |
| CNVR93  | chr29:49708126-49792624  | KCNQ1    | 0.0005 |             |                   |
| CNVR75  | chr3:107152031-107298025 | FCRL5    | 0.0005 |             |                   |
| CNVR75  | chr3:107152031-107298025 | FCRL4    | 0.0005 |             |                   |
| CNVR47  | chr14:332064-1054637     | SNTB1    | 0.0004 |             |                   |
| CNVR47  | chr14:332064-1054637     | MTBP     | 0.0004 |             |                   |
| CNVR47  | chr14:332064-1054637     | MRPL13   | 0.0004 |             |                   |
| CNVR47  | chr14:332064-1054637     | COL14A1  | 0.0004 |             |                   |
| CNVR47  | chr14:332064-1054637     | DEPTOR   | 0.0004 |             |                   |
| CNVR47  | chr14:332064-1054637     | DSCC1    | 0.0004 |             |                   |
| CNVR47  | chr14:332064-1054637     | TAF2     | 0.0004 |             |                   |
| CNVR73  | chr4:2250200-2775129     | SHH      | 0.0004 | Polydactyly | domestic c.000810 |
| CNVR73  | chr4:2250200-2775129     | EN2      | 0.0004 |             |                   |
| CNVR73  | chr4:2250200-2775129     | INSIG1   | 0.0004 |             |                   |
| CNVR73  | chr4:2250200-2775129     | RBM33    | 0.0004 |             |                   |
| CNVR73  | chr4:2250200-2775129     | CNPY1    | 0.0004 |             |                   |
| CNVR138 | chr27:5100808-5417544    | RARB     | 0.0004 |             |                   |
| CNVR152 | chr24:3315348-4054458    | TSHZ1    | 0.0004 |             |                   |
| CNVR152 | chr24:3315348-4054458    | ZADH2    | 0.0004 |             |                   |
| CNVR152 | chr24:3315348-4054458    | ZNF407   | 0.0004 |             |                   |
| CNVR152 | chr24:3315348-4054458    | CNDP1    | 0.0004 |             |                   |
| CNVR152 | chr24:3315348-4054458    | CNDP2    | 0.0004 |             |                   |
| CNVR152 | chr24:3315348-4054458    | FAM69C   | 0.0004 |             |                   |
| CNVR56  | chr1:38797096-39793993   | EPHA6    | 0.0004 |             |                   |
| CNVR157 | chr7:88779618-89043687   | RAD50    | 0.0004 |             |                   |
| CNVR157 | chr7:88779618-89043687   | KIF3A    | 0.0004 |             |                   |
| CNVR157 | chr7:88779618-89043687   | SEPT8    | 0.0004 |             |                   |
| CNVR126 | chr23:15028145-15342928  | NQO2     | 0.0004 |             |                   |
| CNVR126 | chr23:15028145-15342928  | RIPK1    | 0.0004 |             |                   |
| CNVR126 | chr23:15028145-15342928  | BPHL     | 0.0004 |             |                   |
| CNVR126 | chr23:15028145-15342928  | TUBB2A   | 0.0004 |             |                   |
| CNVR126 | chr23:15028145-15342928  | PSMG4    | 0.0004 |             |                   |
| CNVR126 | chr23:15028145-15342928  | SLC22A23 | 0.0004 |             |                   |
| CNVR90  | chr26:2472972-3256573    | GLRX3    | 0.0004 |             |                   |
| CNVR90  | chr26:2472972-3256573    | EBF3     | 0.0004 |             |                   |
| CNVR90  | chr26:2472972-3256573    | MGMT     | 0.0004 |             |                   |
| CNVR51  | chr29:45588359-46608475  | NDUFS8   | 0.0004 |             |                   |

|         |                         |          |        |
|---------|-------------------------|----------|--------|
| CNVR51  | chr29:45588359-46608475 | CLCF1    | 0.0004 |
| CNVR51  | chr29:45588359-46608475 | RAD9A    | 0.0004 |
| CNVR51  | chr29:45588359-46608475 | PPP1CA   | 0.0004 |
| CNVR51  | chr29:45588359-46608475 | POLR2L   | 0.0004 |
| CNVR51  | chr29:45588359-46608475 | CD151    | 0.0004 |
| CNVR51  | chr29:45588359-46608475 | RPLP2    | 0.0004 |
| CNVR51  | chr29:45588359-46608475 | SLC25A22 | 0.0004 |
| CNVR51  | chr29:45588359-46608475 | CEND1    | 0.0004 |
| CNVR51  | chr29:45588359-46608475 | PDDC1    | 0.0004 |
| CNVR51  | chr29:45588359-46608475 | EPS8L2   | 0.0004 |
| CNVR51  | chr29:45588359-46608475 | TMEM80   | 0.0004 |
| CNVR51  | chr29:45588359-46608475 | DEAF1    | 0.0004 |
| CNVR51  | chr29:45588359-46608475 | DRD4     | 0.0004 |
| CNVR51  | chr29:45588359-46608475 | SCT      | 0.0004 |
| CNVR51  | chr29:45588359-46608475 | CDHR5    | 0.0004 |
| CNVR51  | chr29:45588359-46608475 | IRF7     | 0.0004 |
| CNVR51  | chr29:45588359-46608475 | PHRF1    | 0.0004 |
| CNVR51  | chr29:45588359-46608475 | RASSF7   | 0.0004 |
| CNVR51  | chr29:45588359-46608475 | LRRCS6   | 0.0004 |
| CNVR51  | chr29:45588359-46608475 | HRAS     | 0.0004 |
| CNVR51  | chr29:45588359-46608475 | RNH1     | 0.0004 |
| CNVR51  | chr29:45588359-46608475 | PTDSS2   | 0.0004 |
| CNVR51  | chr29:45588359-46608475 | ANO9     | 0.0004 |
| CNVR51  | chr29:45588359-46608475 | SIGIRR   | 0.0004 |
| CNVR51  | chr29:45588359-46608475 | PKP3     | 0.0004 |
| CNVR51  | chr29:45588359-46608475 | PGGHG    | 0.0004 |
| CNVR51  | chr29:45588359-46608475 | IFITM5   | 0.0004 |
| CNVR51  | chr29:45588359-46608475 | B4GALNT4 | 0.0004 |
| CNVR51  | chr29:45588359-46608475 | AP2A2    | 0.0004 |
| CNVR51  | chr29:45588359-46608475 | MUC6     | 0.0004 |
| CNVR51  | chr29:45588359-46608475 | GPR152   | 0.0004 |
| CNVR51  | chr29:45588359-46608475 | TMEM134  | 0.0004 |
| CNVR51  | chr29:45588359-46608475 | AIP      | 0.0004 |
| CNVR51  | chr29:45588359-46608475 | PITPNM1  | 0.0004 |
| CNVR51  | chr29:45588359-46608475 | CDK2AP2  | 0.0004 |
| CNVR51  | chr29:45588359-46608475 | CABP2    | 0.0004 |
| CNVR51  | chr29:45588359-46608475 | NDUFV1   | 0.0004 |
| CNVR51  | chr29:45588359-46608475 | NUDT8    | 0.0004 |
| CNVR51  | chr29:45588359-46608475 | TBX10    | 0.0004 |
| CNVR51  | chr29:45588359-46608475 | UNC93B1  | 0.0004 |
| CNVR51  | chr29:45588359-46608475 | ALDH3B1  | 0.0004 |
| CNVR51  | chr29:45588359-46608475 | GRK2     | 0.0004 |
| CNVR51  | chr29:45588359-46608475 | ANKRD13D | 0.0004 |
| CNVR51  | chr29:45588359-46608475 | SSH3     | 0.0004 |
| CNVR51  | chr29:45588359-46608475 | POLD4    | 0.0004 |
| CNVR110 | chr5:11659559-14309086  | CCDC59   | 0.0003 |
| CNVR110 | chr5:11659559-14309086  | METTL25  | 0.0003 |
| CNVR110 | chr5:11659559-14309086  | TMTC2    | 0.0003 |

|         |                          |           |        |                                 |                   |
|---------|--------------------------|-----------|--------|---------------------------------|-------------------|
| CNVR95  | chr9:88180866-89539337   | RPS6KA2   | 0.0003 |                                 |                   |
| CNVR95  | chr9:88180866-89539337   | RNASSET2  | 0.0003 |                                 |                   |
| CNVR95  | chr9:88180866-89539337   | FGFR1OP   | 0.0003 |                                 |                   |
| CNVR95  | chr9:88180866-89539337   | CCR6      | 0.0003 |                                 |                   |
| CNVR95  | chr9:88180866-89539337   | GPR31     | 0.0003 |                                 |                   |
| CNVR95  | chr9:88180866-89539337   | TLL2      | 0.0003 |                                 |                   |
| CNVR95  | chr9:88180866-89539337   | UNC93A    | 0.0003 |                                 |                   |
| CNVR95  | chr9:88180866-89539337   | PDE10A    | 0.0003 |                                 |                   |
| CNVR95  | chr9:88180866-89539337   | T         | 0.0003 | Tail, short                     | dog, dome: 000975 |
| CNVR95  | chr9:88180866-89539337   | PRR18     | 0.0003 |                                 |                   |
| CNVR95  | chr9:88180866-89539337   | SFT2D1    | 0.0003 |                                 |                   |
| CNVR95  | chr9:88180866-89539337   | MPC1      | 0.0003 |                                 |                   |
| CNVR82  | chr8:582488-1142320      | PALLD     | 0.0003 |                                 |                   |
| CNVR82  | chr8:582488-1142320      | CBR4      | 0.0003 |                                 |                   |
| CNVR82  | chr8:582488-1142320      | SH3RF1    | 0.0003 |                                 |                   |
| CNVR67  | chr27:25236788-25444255  | FGF20     | 0.0003 | Scaleless                       | chicken 000889    |
| CNVR67  | chr27:25236788-25444255  | MICU3     | 0.0003 |                                 |                   |
| CNVR59  | chr27:1338387-1884247    | ZNF385D   | 0.0003 |                                 |                   |
| CNVR24  | chr23:47788379-48834600  | KHDRBS2   | 0.0003 |                                 |                   |
| CNVR98  | chr7:106583259-106771982 | ADAMTS2   | 0.0003 | Ehlers-Danlos sync cattle, shee | 000328            |
| CNVR71  | chr14:79378786-79749648  | DENND3    | 0.0003 |                                 |                   |
| CNVR71  | chr14:79378786-79749648  | SLC45A4   | 0.0003 |                                 |                   |
| CNVR71  | chr14:79378786-79749648  | GPR20     | 0.0003 |                                 |                   |
| CNVR71  | chr14:79378786-79749648  | PTP4A3    | 0.0003 |                                 |                   |
| CNVR71  | chr14:79378786-79749648  | MROH5     | 0.0003 |                                 |                   |
| CNVR65  | chr6:22308-2047202       | MARCH1    | 0.0003 |                                 |                   |
| CNVR65  | chr6:22308-2047202       | APELA     | 0.0003 |                                 |                   |
| CNVR89  | chr4:62451-715351        | WDR60     | 0.0003 |                                 |                   |
| CNVR89  | chr4:62451-715351        | ESYT2     | 0.0003 |                                 |                   |
| CNVR89  | chr4:62451-715351        | NCAPG2    | 0.0003 |                                 |                   |
| CNVR89  | chr4:62451-715351        | PTPRN2    | 0.0003 |                                 |                   |
| CNVR89  | chr4:62451-715351        | VIPR2     | 0.0003 |                                 |                   |
| CNVR339 | chr11:38072888-38247631  | EFEMP1    | 0.0002 |                                 |                   |
| CNVR275 | chr6:86080909-86209708   | ODAM      | 0.0002 |                                 |                   |
| CNVR141 | chr3:5125312-5705846     | AGAP1     | 0.0002 |                                 |                   |
| CNVR77  | chr20:46424799-47167387  | CDH9      | 0.0002 |                                 |                   |
| CNVR223 | chr1:132309148-132501677 | STAG1     | 0.0002 |                                 |                   |
| CNVR223 | chr1:132309148-132501677 | PCCB      | 0.0002 |                                 |                   |
| CNVR117 | chr3:2222064-2516803     | HDAC4     | 0.0002 |                                 |                   |
| CNVR440 | chr11:58362651-58514722  | LRRTM4    | 0.0002 |                                 |                   |
| CNVR137 | chr5:108840-860995       | TSPAN8    | 0.0002 |                                 |                   |
| CNVR181 | chr24:60953858-62183185  | VPS4B     | 0.0002 |                                 |                   |
| CNVR181 | chr24:60953858-62183185  | SERPINB5  | 0.0002 |                                 |                   |
| CNVR181 | chr24:60953858-62183185  | TNFRSF11A | 0.0002 |                                 |                   |
| CNVR181 | chr24:60953858-62183185  | ZCCHC2    | 0.0002 |                                 |                   |
| CNVR181 | chr24:60953858-62183185  | PHLPP1    | 0.0002 |                                 |                   |
| CNVR181 | chr24:60953858-62183185  | KDSR      | 0.0002 | Spinal muscular at cattle       | 000939            |
| CNVR181 | chr24:60953858-62183185  | SERPINB11 | 0.0002 | Hoof wall separati horse        | 001897            |

|         |                          |          |        |
|---------|--------------------------|----------|--------|
| CNVR181 | chr24:60953858-62183185  | SERPINB7 | 0.0002 |
| CNVR116 | chr3:3026943-3303405     | ESPNL    | 0.0002 |
| CNVR116 | chr3:3026943-3303405     | TRAF3IP1 | 0.0002 |
| CNVR116 | chr3:3026943-3303405     | PER2     | 0.0002 |
| CNVR116 | chr3:3026943-3303405     | HES6     | 0.0002 |
| CNVR116 | chr3:3026943-3303405     | ILKAP    | 0.0002 |
| CNVR116 | chr3:3026943-3303405     | ERFE     | 0.0002 |
| CNVR116 | chr3:3026943-3303405     | KLHL30   | 0.0002 |
| CNVR116 | chr3:3026943-3303405     | SCLY     | 0.0002 |
| CNVR130 | chr7:1227401-3004872     | TMEM232  | 0.0002 |
| CNVR130 | chr7:1227401-3004872     | MAN2A1   | 0.0002 |
| CNVR130 | chr7:1227401-3004872     | PJA2     | 0.0002 |
| CNVR130 | chr7:1227401-3004872     | FER      | 0.0002 |
| CNVR129 | chr13:33584844-34013084  | ZNF438   | 0.0002 |
| CNVR129 | chr13:33584844-34013084  | SVIL     | 0.0002 |
| CNVR156 | chr4:57419911-57607573   | BMPER    | 0.0002 |
| CNVR70  | chr16:34115525-34231258  | RGS7     | 0.0002 |
| CNVR85  | chr8:58825085-59052082   | FAM205C  | 0.0002 |
| CNVR53  | chr14:26058923-26314061  | EMC2     | 0.0002 |
| CNVR115 | chr12:72996126-73332412  | ENOX1    | 0.0002 |
| CNVR115 | chr12:72996126-73332412  | DNAJC15  | 0.0002 |
| CNVR103 | chr16:74965554-75810738  | CRB1     | 0.0002 |
| CNVR103 | chr16:74965554-75810738  | NEK7     | 0.0002 |
| CNVR103 | chr16:74965554-75810738  | DENND1B  | 0.0002 |
| CNVR103 | chr16:74965554-75810738  | LHX9     | 0.0002 |
| CNVR94  | chr18:57911618-57982792  | ACPT     | 0.0002 |
| CNVR94  | chr18:57911618-57982792  | GPR32    | 0.0002 |
| CNVR175 | chr29:12359291-12983191  | FAM181B  | 0.0002 |
| CNVR84  | chr10:57679258-57949639  | OAZ2     | 0.0001 |
| CNVR84  | chr10:57679258-57949639  | RBPMS2   | 0.0001 |
| CNVR84  | chr10:57679258-57949639  | PIF1     | 0.0001 |
| CNVR84  | chr10:57679258-57949639  | PLEKHO2  | 0.0001 |
| CNVR84  | chr10:57679258-57949639  | PTGDR    | 0.0001 |
| CNVR131 | chr23:45010453-45458947  | DST      | 0.0001 |
| CNVR107 | chr1:144909367-145273699 | ADARB1   | 0.0001 |
| CNVR107 | chr1:144909367-145273699 | POFUT2   | 0.0001 |
| CNVR107 | chr1:144909367-145273699 | COL18A1  | 0.0001 |
| CNVR107 | chr1:144909367-145273699 | SLC19A1  | 0.0001 |
| CNVR127 | chr2:136086596-136475658 | OCA2     | 0.0001 |
| CNVR127 | chr2:136086596-136475658 | LGSN     | 0.0001 |
| CNVR104 | chr16:74571028-74805855  | ZBTB41   | 0.0001 |
| CNVR104 | chr16:74571028-74805855  | CRB1     | 0.0001 |
| CNVR104 | chr16:74571028-74805855  | ASPM     | 0.0001 |
| CNVR104 | chr16:74571028-74805855  | CFHR5    | 0.0001 |
| CNVR231 | chr2:13861-250236        | CLCNKA   | 0.0001 |
| CNVR231 | chr2:13861-250236        | HSPB7    | 0.0001 |
| CNVR231 | chr2:13861-250236        | FAM131C  | 0.0001 |
| CNVR231 | chr2:13861-250236        | EPHA2    | 0.0001 |

Coat colour, ocular Mexican te 002130



|         |                           |          |        |                   |     |        |
|---------|---------------------------|----------|--------|-------------------|-----|--------|
| CNVR231 | chr2:13861-250236         | ARHGEF19 | 0.0001 |                   |     |        |
| CNVR215 | chr15:30441621-30600838   | FCHSD2   | 0.0001 |                   |     |        |
| CNVR171 | chr25:39998687-40430012   | PAPOLB   | 0.0001 |                   |     |        |
| CNVR171 | chr25:39998687-40430012   | AP5Z1    | 0.0001 |                   |     |        |
| CNVR171 | chr25:39998687-40430012   | FOXK1    | 0.0001 |                   |     |        |
| CNVR171 | chr25:39998687-40430012   | SDK1     | 0.0001 |                   |     |        |
| CNVR184 | chr9:89587523-90109612    | AFDN     | 0.0001 |                   |     |        |
| CNVR184 | chr9:89587523-90109612    | KIF25    | 0.0001 |                   |     |        |
| CNVR184 | chr9:89587523-90109612    | DACT2    | 0.0001 |                   |     |        |
| CNVR184 | chr9:89587523-90109612    | SMOC2    | 0.0001 | Brachycephaly     | dog | 001551 |
| CNVR140 | chr26:28287024-28446758   | WBP1L    | 0.0001 |                   |     |        |
| CNVR140 | chr26:28287024-28446758   | SFXN2    | 0.0001 |                   |     |        |
| CNVR140 | chr26:28287024-28446758   | ARL3     | 0.0001 |                   |     |        |
| CNVR140 | chr26:28287024-28446758   | TRIM8    | 0.0001 |                   |     |        |
| CNVR132 | chr17:63012634-63391313   | DCLK2    | 0.0001 |                   |     |        |
| CNVR132 | chr17:63012634-63391313   | LRBA     | 0.0001 |                   |     |        |
| CNVR182 | chr17:30853999-30953291   | FNIP2    | 0.0001 | Hypomyelination c | dog | 000526 |
| CNVR72  | chr2:123933312-124821874  | ZNF804A  | 0.0001 |                   |     |        |
| CNVR149 | chr26:45870623-46285242   | PCDH15   | 0.0001 |                   |     |        |
| CNVR114 | chr2:99159206-99399810    | BAZ2B    | 0.0001 |                   |     |        |
| CNVR276 | chr19:47379297-47511441   | KCNH6    | 0.0001 |                   |     |        |
| CNVR276 | chr19:47379297-47511441   | DCAF7    | 0.0001 |                   |     |        |
| CNVR458 | chr22:52360808-52732194   | SETD2    | 0.0001 |                   |     |        |
| CNVR458 | chr22:52360808-52732194   | NBEAL2   | 0.0001 |                   |     |        |
| CNVR458 | chr22:52360808-52732194   | CCDC12   | 0.0001 |                   |     |        |
| CNVR458 | chr22:52360808-52732194   | PTH1R    | 0.0001 |                   |     |        |
| CNVR208 | chr16:59671764-60045932   | TOR1AIP1 | 0.0001 |                   |     |        |
| CNVR208 | chr16:59671764-60045932   | CEP350   | 0.0001 |                   |     |        |
| CNVR208 | chr16:59671764-60045932   | QSOX1    | 0.0001 |                   |     |        |
| CNVR208 | chr16:59671764-60045932   | LHX4     | 0.0001 |                   |     |        |
| CNVR458 | chr22:52360808-52732194   | KLHL18   | 0.0001 |                   |     |        |
| CNVR458 | chr22:52360808-52732194   | KIF9     | 0.0001 |                   |     |        |
| CNVR458 | chr22:52360808-52732194   | MYL3     | 0.0001 |                   |     |        |
| CNVR456 | chr2:55105878-55191169    | TMEFF2   | 0.0001 |                   |     |        |
| CNVR108 | chr11:103407881-104950126 | REXO4    | 0.0001 |                   |     |        |
| CNVR108 | chr11:103407881-104950126 | ADAMTS13 | 0.0001 |                   |     |        |
| CNVR108 | chr11:103407881-104950126 | CACFD1   | 0.0001 |                   |     |        |
| CNVR108 | chr11:103407881-104950126 | SLC2A6   | 0.0001 |                   |     |        |
| CNVR108 | chr11:103407881-104950126 | TMEM8C   | 0.0001 |                   |     |        |
| CNVR108 | chr11:103407881-104950126 | ADAMTSL2 | 0.0001 | Musladin-Lueke sy | dog | 001509 |
| CNVR108 | chr11:103407881-104950126 | FAM163B  | 0.0001 |                   |     |        |
| CNVR108 | chr11:103407881-104950126 | DBH      | 0.0001 |                   |     |        |
| CNVR108 | chr11:103407881-104950126 | SARDH    | 0.0001 |                   |     |        |
| CNVR108 | chr11:103407881-104950126 | VAV2     | 0.0001 |                   |     |        |
| CNVR108 | chr11:103407881-104950126 | BRD3     | 0.0001 |                   |     |        |
| CNVR108 | chr11:103407881-104950126 | WDR5     | 0.0001 |                   |     |        |
| CNVR108 | chr11:103407881-104950126 | CLIC3    | 0.0001 |                   |     |        |
| CNVR108 | chr11:103407881-104950126 | RABL6    | 0.0001 |                   |     |        |

|         |                           |          |        |                          |                   |
|---------|---------------------------|----------|--------|--------------------------|-------------------|
| CNVR108 | chr11:103407881-104950126 | TMEM141  | 0.0001 |                          |                   |
| CNVR108 | chr11:103407881-104950126 | LCN6     | 0.0001 |                          |                   |
| CNVR108 | chr11:103407881-104950126 | LCN10    | 0.0001 |                          |                   |
| CNVR108 | chr11:103407881-104950126 | MRPS2    | 0.0001 |                          |                   |
| CNVR108 | chr11:103407881-104950126 | PPP1R26  | 0.0001 |                          |                   |
| CNVR108 | chr11:103407881-104950126 | OLFM1    | 0.0001 |                          |                   |
| CNVR108 | chr11:103407881-104950126 | EGFL7    | 0.0001 |                          |                   |
| CNVR108 | chr11:103407881-104950126 | AGPAT2   | 0.0001 |                          |                   |
| CNVR108 | chr11:103407881-104950126 | FAM69B   | 0.0001 |                          |                   |
| CNVR108 | chr11:103407881-104950126 | ABO      | 0.0001 | Blood group system ABO   | Japanese n 001089 |
| CNVR108 | chr11:103407881-104950126 | SURF6    | 0.0001 |                          |                   |
| CNVR108 | chr11:103407881-104950126 | MED22    | 0.0001 | Abortion (embryor cattle | 002043            |
| CNVR108 | chr11:103407881-104950126 | RPL7A    | 0.0001 |                          |                   |
| CNVR108 | chr11:103407881-104950126 | SURF2    | 0.0001 |                          |                   |
| CNVR108 | chr11:103407881-104950126 | SURF4    | 0.0001 |                          |                   |
| CNVR341 | chr20:2904384-3020956     | RANBP17  | 0.0001 |                          |                   |
| CNVR225 | chr11:82348757-82597945   | DDX1     | 0.0001 |                          |                   |
| CNVR225 | chr11:82348757-82597945   | NBAS     | 0.0001 |                          |                   |
| CNVR109 | chr25:38139396-39274894   | TRRAP    | 0.0001 |                          |                   |
| CNVR109 | chr25:38139396-39274894   | TMEM130  | 0.0001 |                          |                   |
| CNVR109 | chr25:38139396-39274894   | NPTX2    | 0.0001 |                          |                   |
| CNVR109 | chr25:38139396-39274894   | BAIAP2L1 | 0.0001 |                          |                   |
| CNVR109 | chr25:38139396-39274894   | TECPR1   | 0.0001 |                          |                   |
| CNVR109 | chr25:38139396-39274894   | BHLHA15  | 0.0001 |                          |                   |
| CNVR109 | chr25:38139396-39274894   | LMTK2    | 0.0001 |                          |                   |
| CNVR109 | chr25:38139396-39274894   | OCM2     | 0.0001 |                          |                   |
| CNVR109 | chr25:38139396-39274894   | CCZ1     | 0.0001 |                          |                   |
| CNVR109 | chr25:38139396-39274894   | PMS2     | 0.0001 |                          |                   |
| CNVR109 | chr25:38139396-39274894   | AIMP2    | 0.0001 |                          |                   |
| CNVR109 | chr25:38139396-39274894   | EIF2AK1  | 0.0001 |                          |                   |
| CNVR109 | chr25:38139396-39274894   | ANKRD61  | 0.0001 |                          |                   |
| CNVR109 | chr25:38139396-39274894   | USP42    | 0.0001 |                          |                   |
| CNVR109 | chr25:38139396-39274894   | CYTH3    | 0.0001 |                          |                   |
| CNVR109 | chr25:38139396-39274894   | FAM220A  | 0.0001 |                          |                   |
| CNVR109 | chr25:38139396-39274894   | RAC1     | 0.0001 |                          |                   |
| CNVR109 | chr25:38139396-39274894   | DAGLB    | 0.0001 |                          |                   |
| CNVR109 | chr25:38139396-39274894   | KDEL2    | 0.0001 |                          |                   |
| CNVR109 | chr25:38139396-39274894   | GRID2IP  | 0.0001 |                          |                   |
| CNVR109 | chr25:38139396-39274894   | ZDHHC4   | 0.0001 |                          |                   |
| CNVR109 | chr25:38139396-39274894   | BRI3     | 0.0001 |                          |                   |
| CNVR111 | chr2:132306650-132392324  | HS6ST1   | 0.0001 |                          |                   |
| CNVR123 | chr6:32579713-33416312    | GRID2    | 0.0001 |                          |                   |
| CNVR148 | chr21:1893967-2183843     | ATP10A   | 0.0001 |                          |                   |
| CNVR81  | chr4:95414503-96850045    | ANKMY2   | 0.0001 |                          |                   |
| CNVR81  | chr4:95414503-96850045    | LRRC72   | 0.0001 |                          |                   |
| CNVR81  | chr4:95414503-96850045    | SOSTDC1  | 0.0001 |                          |                   |
| CNVR81  | chr4:95414503-96850045    | ISPD     | 0.0001 |                          |                   |

|         |                           |          |        |                        |        |
|---------|---------------------------|----------|--------|------------------------|--------|
| CNVR81  | chr4:95414503-96850045    | MEOX2    | 0.0001 |                        |        |
| CNVR81  | chr4:95414503-96850045    | AGMO     | 0.0001 |                        |        |
| CNVR153 | chr2:92655933-92753615    | PRPF40A  | 0.0001 |                        |        |
| CNVR153 | chr2:92655933-92753615    | ARL6IP6  | 0.0001 |                        |        |
| CNVR227 | chr13:72542824-72636178   | PKIG     | 0.0001 |                        |        |
| CNVR227 | chr13:72542824-72636178   | ADA      | 0.0001 |                        |        |
| CNVR125 | chr7:1079-127968          | STARD4   | 0.0001 |                        |        |
| CNVR125 | chr7:1079-127968          | CAMK4    | 0.0001 |                        |        |
| CNVR179 | chr28:15803416-16016815   | CAMK2G   | 0.0001 |                        |        |
| CNVR179 | chr28:15803416-16016815   | NDST2    | 0.0001 |                        |        |
| CNVR179 | chr28:15803416-16016815   | ZSWIM8   | 0.0001 |                        |        |
| CNVR179 | chr28:15803416-16016815   | CHCHD1   | 0.0001 |                        |        |
| CNVR179 | chr28:15803416-16016815   | FUT11    | 0.0001 |                        |        |
| CNVR179 | chr28:15803416-16016815   | SEC24C   | 0.0001 |                        |        |
| CNVR179 | chr28:15803416-16016815   | SYNPO2L  | 0.0001 |                        |        |
| CNVR179 | chr28:15803416-16016815   | MYOZ1    | 0.0001 |                        |        |
| CNVR287 | chr13:53499132-53941826   | YTHDF1   | 0.0001 |                        |        |
| CNVR287 | chr13:53499132-53941826   | BHLHE23  | 0.0001 |                        |        |
| CNVR287 | chr13:53499132-53941826   | SLC17A9  | 0.0001 |                        |        |
| CNVR287 | chr13:53499132-53941826   | GID8     | 0.0001 |                        |        |
| CNVR287 | chr13:53499132-53941826   | DIDO1    | 0.0001 |                        |        |
| CNVR287 | chr13:53499132-53941826   | TCFL5    | 0.0001 |                        |        |
| CNVR287 | chr13:53499132-53941826   | COL9A3   | 0.0001 | Oculoskeletal dysp dog | 001522 |
| CNVR287 | chr13:53499132-53941826   | OGFR     | 0.0001 |                        |        |
| CNVR287 | chr13:53499132-53941826   | MRGBP    | 0.0001 |                        |        |
| CNVR287 | chr13:53499132-53941826   | NTSR1    | 0.0001 |                        |        |
| CNVR286 | chr11:102075796-102218431 | CFAP77   | 0.0001 |                        |        |
| CNVR286 | chr11:102075796-102218431 | BARHL1   | 0.0001 |                        |        |
| CNVR286 | chr11:102075796-102218431 | DDX31    | 0.0001 |                        |        |
| CNVR286 | chr11:102075796-102218431 | GTF3C4   | 0.0001 |                        |        |
| CNVR287 | chr13:53499132-53941826   | KCNQ2    | 0.0001 |                        |        |
| CNVR287 | chr13:53499132-53941826   | CHRNA4   | 0.0001 |                        |        |
| CNVR287 | chr13:53499132-53941826   | COL20A1  | 0.0001 |                        |        |
| CNVR287 | chr13:53499132-53941826   | ARFGAP1  | 0.0001 |                        |        |
| CNVR287 | chr13:53499132-53941826   | BIRC7    | 0.0001 |                        |        |
| CNVR209 | chr8:110673261-110877615  | COLEC11  | 0.0001 |                        |        |
| CNVR209 | chr8:110673261-110877615  | RPS7     | 0.0001 |                        |        |
| CNVR209 | chr8:110673261-110877615  | RNASEH1  | 0.0001 |                        |        |
| CNVR209 | chr8:110673261-110877615  | ADI1     | 0.0001 |                        |        |
| CNVR209 | chr8:110673261-110877615  | TRAPPC12 | 0.0001 |                        |        |
| CNVR209 | chr8:110673261-110877615  | TSSC1    | 0.0001 |                        |        |
| CNVR210 | chr11:102687644-103216934 | GLT6D1   | 0.0001 |                        |        |
| CNVR210 | chr11:102687644-103216934 | LCN9     | 0.0001 |                        |        |
| CNVR210 | chr11:102687644-103216934 | SOHLH1   | 0.0001 |                        |        |
| CNVR210 | chr11:102687644-103216934 | KCNT1    | 0.0001 |                        |        |
| CNVR210 | chr11:102687644-103216934 | CAMSAP1  | 0.0001 |                        |        |
| CNVR210 | chr11:102687644-103216934 | UBAC1    | 0.0001 |                        |        |
| CNVR210 | chr11:102687644-103216934 | NACC2    | 0.0001 |                        |        |

|         |                           |          |        |                        |        |
|---------|---------------------------|----------|--------|------------------------|--------|
| CNVR210 | chr11:102687644-103216934 | CCDC187  | 0.0001 |                        |        |
| CNVR167 | chr7:58209310-58734465    | HARS2    | 0.0001 |                        |        |
| CNVR167 | chr7:58209310-58734465    | HARS     | 0.0001 |                        |        |
| CNVR167 | chr7:58209310-58734465    | DND1     | 0.0001 |                        |        |
| CNVR167 | chr7:58209310-58734465    | WDR55    | 0.0001 |                        |        |
| CNVR167 | chr7:58209310-58734465    | IK       | 0.0001 |                        |        |
| CNVR167 | chr7:58209310-58734465    | NDUFA2   | 0.0001 |                        |        |
| CNVR167 | chr7:58209310-58734465    | TMCO6    | 0.0001 |                        |        |
| CNVR167 | chr7:58209310-58734465    | CD14     | 0.0001 |                        |        |
| CNVR167 | chr7:58209310-58734465    | PCDHB7   | 0.0001 |                        |        |
| CNVR167 | chr7:58209310-58734465    | PCDHB1   | 0.0001 |                        |        |
| CNVR167 | chr7:58209310-58734465    | ZMAT2    | 0.0001 |                        |        |
| CNVR167 | chr7:58209310-58734465    | PCDHB16  | 0.0001 |                        |        |
| CNVR100 | chr29:42500827-42809961   | MARK2    | 0.0001 |                        |        |
| CNVR100 | chr29:42500827-42809961   | RCOR2    | 0.0001 |                        |        |
| CNVR100 | chr29:42500827-42809961   | NAA40    | 0.0001 |                        |        |
| CNVR100 | chr29:42500827-42809961   | OTUB1    | 0.0001 |                        |        |
| CNVR100 | chr29:42500827-42809961   | MACROD1  | 0.0001 |                        |        |
| CNVR100 | chr29:42500827-42809961   | CORO1B   | 0.0001 |                        |        |
| CNVR100 | chr29:42500827-42809961   | PTPRCAP  | 0.0001 |                        |        |
| CNVR100 | chr29:42500827-42809961   | RPS6KB2  | 0.0001 |                        |        |
| CNVR100 | chr29:42500827-42809961   | CARNS1   | 0.0001 |                        |        |
| CNVR100 | chr29:42500827-42809961   | TBC1D10C | 0.0001 |                        |        |
| CNVR162 | chr17:26123195-26325287   | EP400    | 0.0001 |                        |        |
| CNVR162 | chr17:26123195-26325287   | DDX51    | 0.0001 |                        |        |
| CNVR162 | chr17:26123195-26325287   | NOC4L    | 0.0001 |                        |        |
| CNVR162 | chr17:26123195-26325287   | GALNT9   | 0.0001 |                        |        |
| CNVR133 | chr18:15106987-15464370   | ZNF469   | 0.0001 |                        |        |
| CNVR133 | chr18:15106987-15464370   | ZFPM1    | 0.0001 |                        |        |
| CNVR133 | chr18:15106987-15464370   | ZC3H18   | 0.0001 |                        |        |
| CNVR133 | chr18:15106987-15464370   | IL17C    | 0.0001 |                        |        |
| CNVR133 | chr18:15106987-15464370   | MVD      | 0.0001 |                        |        |
| CNVR133 | chr18:15106987-15464370   | SNAI3    | 0.0001 |                        |        |
| CNVR133 | chr18:15106987-15464370   | CTU2     | 0.0001 |                        |        |
| CNVR133 | chr18:15106987-15464370   | RNF166   | 0.0001 |                        |        |
| CNVR133 | chr18:15106987-15464370   | PIEZO1   | 0.0001 |                        |        |
| CNVR133 | chr18:15106987-15464370   | CDT1     | 0.0001 |                        |        |
| CNVR133 | chr18:15106987-15464370   | APRT     | 0.0001 |                        |        |
| CNVR133 | chr18:15106987-15464370   | GALNS    | 0.0001 |                        |        |
| CNVR133 | chr18:15106987-15464370   | TRAPPC2L | 0.0001 |                        |        |
| CNVR133 | chr18:15106987-15464370   | PABPN1L  | 0.0001 |                        |        |
| CNVR133 | chr18:15106987-15464370   | CBFA2T3  | 0.0001 |                        |        |
| CNVR158 | chr1:60322989-60498181    | LSAMP    | 0.0001 |                        |        |
| CNVR202 | chr19:26724394-27074197   | SOX15    | 0.0001 |                        |        |
| CNVR202 | chr19:26724394-27074197   | FXR2     | 0.0001 |                        |        |
| CNVR202 | chr19:26724394-27074197   | DLG4     | 0.0001 |                        |        |
| CNVR202 | chr19:26724394-27074197   | ACADVL   | 0.0001 | Exercise induced n dog | 002140 |
| CNVR202 | chr19:26724394-27074197   | DVL2     | 0.0001 |                        |        |

|         |                         |         |        |                   |        |        |
|---------|-------------------------|---------|--------|-------------------|--------|--------|
| CNVR202 | chr19:26724394-27074197 | PHF23   | 0.0001 |                   |        |        |
| CNVR202 | chr19:26724394-27074197 | GABARAP | 0.0001 |                   |        |        |
| CNVR202 | chr19:26724394-27074197 | CTDNBP1 | 0.0001 |                   |        |        |
| CNVR202 | chr19:26724394-27074197 | ELP5    | 0.0001 |                   |        |        |
| CNVR202 | chr19:26724394-27074197 | CLDN7   | 0.0001 |                   |        |        |
| CNVR202 | chr19:26724394-27074197 | YBX2    | 0.0001 |                   |        |        |
| CNVR202 | chr19:26724394-27074197 | EIF5A   | 0.0001 |                   |        |        |
| CNVR202 | chr19:26724394-27074197 | GPS2    | 0.0001 |                   |        |        |
| CNVR202 | chr19:26724394-27074197 | KCTD11  | 0.0001 |                   |        |        |
| CNVR202 | chr19:26724394-27074197 | TMEM95  | 0.0001 | Male subfertility | cattle | 001902 |
| CNVR202 | chr19:26724394-27074197 | TNK1    | 0.0001 |                   |        |        |
| CNVR202 | chr19:26724394-27074197 | PLSCR3  | 0.0001 |                   |        |        |
| CNVR202 | chr19:26724394-27074197 | TMEM256 | 0.0001 |                   |        |        |
| CNVR202 | chr19:26724394-27074197 | NLGN2   | 0.0001 |                   |        |        |
| CNVR202 | chr19:26724394-27074197 | SPEM1   | 0.0001 |                   |        |        |
| CNVR202 | chr19:26724394-27074197 | TMEM102 | 0.0001 |                   |        |        |
| CNVR202 | chr19:26724394-27074197 | FGF11   | 0.0001 |                   |        |        |
| CNVR202 | chr19:26724394-27074197 | CHRNA1  | 0.0001 | Arthrogryposis mu | cattle | 002022 |
| CNVR202 | chr19:26724394-27074197 | ZBTB4   | 0.0001 |                   |        |        |
| CNVR202 | chr19:26724394-27074197 | SLC35G6 | 0.0001 |                   |        |        |
| CNVR202 | chr19:26724394-27074197 | POLR2A  | 0.0001 |                   |        |        |
| CNVR202 | chr19:26724394-27074197 | TNFSF12 | 0.0001 |                   |        |        |
| CNVR202 | chr19:26724394-27074197 | TNFSF13 | 0.0001 |                   |        |        |
| CNVR202 | chr19:26724394-27074197 | SENP3   | 0.0001 |                   |        |        |
| CNVR202 | chr19:26724394-27074197 | EIF4A1  | 0.0001 |                   |        |        |
| CNVR202 | chr19:26724394-27074197 | CD68    | 0.0001 |                   |        |        |
| CNVR202 | chr19:26724394-27074197 | MPDU1   | 0.0001 |                   |        |        |
| CNVR202 | chr19:26724394-27074197 | NEURL4  | 0.0001 |                   |        |        |
| CNVR202 | chr19:26724394-27074197 | ACAP1   | 0.0001 |                   |        |        |
| CNVR442 | chr20:1807530-1903845   | DOCK2   | 0.0001 |                   |        |        |
| CNVR441 | chr19:38509750-38614803 | NPEPPS  | 0.0001 |                   |        |        |
| CNVR441 | chr19:38509750-38614803 | MRPL45  | 0.0001 |                   |        |        |
| CNVR442 | chr20:1807530-1903845   | FAM196B | 0.0001 |                   |        |        |
| CNVR252 | chr3:15985626-16120558  | FOXO6   | 0.0001 |                   |        |        |
| CNVR252 | chr3:15985626-16120558  | EDN2    | 0.0001 |                   |        |        |
| CNVR190 | chr10:53838083-55208955 | RORA    | 0.0001 |                   |        |        |
| CNVR190 | chr10:53838083-55208955 | VPS13C  | 0.0001 |                   |        |        |
| CNVR212 | chr2:4566719-4848635    | ECE1    | 0.0001 |                   |        |        |
| CNVR212 | chr2:4566719-4848635    | ALPL    | 0.0001 |                   |        |        |
| CNVR212 | chr2:4566719-4848635    | RAP1GAP | 0.0001 |                   |        |        |
| CNVR211 | chr28:44329974-44604756 | RHOA    | 0.0001 |                   |        |        |
| CNVR144 | chr29:38274733-39014509 | PAG-3   | 0.0001 |                   |        |        |
| CNVR144 | chr29:38274733-39014509 | PAG-6   | 0.0001 |                   |        |        |
| CNVR121 | chr4:8320649-8535745    | ZNF786  | 0.0001 |                   |        |        |
| CNVR121 | chr4:8320649-8535745    | ZNF212  | 0.0001 |                   |        |        |
| CNVR121 | chr4:8320649-8535745    | ZNF282  | 0.0001 |                   |        |        |
| CNVR121 | chr4:8320649-8535745    | ZNF398  | 0.0001 |                   |        |        |
| CNVR121 | chr4:8320649-8535745    | PDIA4   | 0.0001 |                   |        |        |

|         |                          |           |        |
|---------|--------------------------|-----------|--------|
| CNVR121 | chr4:8320649-8535745     | ZNF783    | 0.0001 |
| CNVR60  | chr19:52200671-52920434  | C1QTNF1   | 0.0001 |
| CNVR60  | chr19:52200671-52920434  | CANT1     | 0.0001 |
| CNVR60  | chr19:52200671-52920434  | LGALS3BP  | 0.0001 |
| CNVR60  | chr19:52200671-52920434  | TIMP2     | 0.0001 |
| CNVR60  | chr19:52200671-52920434  | CEP295NL  | 0.0001 |
| CNVR60  | chr19:52200671-52920434  | USP36     | 0.0001 |
| CNVR60  | chr19:52200671-52920434  | CYTH1     | 0.0001 |
| CNVR60  | chr19:52200671-52920434  | DNAH17    | 0.0001 |
| CNVR60  | chr19:52200671-52920434  | RBFOX3    | 0.0001 |
| CNVR60  | chr19:52200671-52920434  | ENGASE    | 0.0001 |
| CNVR373 | chr15:37317646-37602965  | OVCH2     | 0.0001 |
| CNVR375 | chr16:21613366-22000559  | EPRS      | 0.0001 |
| CNVR373 | chr15:37317646-37602965  | PPFIBP2   | 0.0001 |
| CNVR375 | chr16:21613366-22000559  | SLC30A10  | 0.0001 |
| CNVR221 | chr18:22982454-23106302  | CHD9      | 0.0001 |
| CNVR220 | chr12:57668107-58162941  | FRY       | 0.0001 |
| CNVR220 | chr12:57668107-58162941  | ZAR1L     | 0.0001 |
| CNVR220 | chr12:57668107-58162941  | BRCA2     | 0.0001 |
| CNVR220 | chr12:57668107-58162941  | N4BP2L1   | 0.0001 |
| CNVR220 | chr12:57668107-58162941  | N4BP2L2   | 0.0001 |
| CNVR151 | chr10:51617654-51927535  | ADAM10    | 0.0001 |
| CNVR151 | chr10:51617654-51927535  | FAM63B    | 0.0001 |
| CNVR151 | chr10:51617654-51927535  | SLTM      | 0.0001 |
| CNVR151 | chr10:51617654-51927535  | RNF111    | 0.0001 |
| CNVR142 | chr7:72722218-73050578   | CLTB      | 0.0001 |
| CNVR142 | chr7:72722218-73050578   | HIGD2A    | 0.0001 |
| CNVR142 | chr7:72722218-73050578   | NOP16     | 0.0001 |
| CNVR142 | chr7:72722218-73050578   | ARL10     | 0.0001 |
| CNVR142 | chr7:72722218-73050578   | COMMD10   | 0.0001 |
| CNVR302 | chr29:39451438-39649276  | APOOL     | 0.0001 |
| CNVR263 | chr6:101920286-102038238 | PTPN13    | 0.0001 |
| CNVR281 | chr21:4686838-4912227    | LRRK1     | 0.0001 |
| CNVR281 | chr21:4686838-4912227    | ALDH1A3   | 0.0001 |
| CNVR205 | chr8:52814579-52989443   | FOXB2     | 0.0001 |
| CNVR444 | chr3:104795722-105040206 | FDPS      | 0.0001 |
| CNVR444 | chr3:104795722-105040206 | RUSC1-AS1 | 0.0001 |
| CNVR444 | chr3:104795722-105040206 | RUSC1     | 0.0001 |
| CNVR444 | chr3:104795722-105040206 | ASH1L     | 0.0001 |
| CNVR444 | chr3:104795722-105040206 | DAP3      | 0.0001 |
| CNVR448 | chr1:117080432-117305709 | SERP1     | 0.0001 |
| CNVR448 | chr1:117080432-117305709 | TSC22D2   | 0.0001 |
| CNVR450 | chr4:41373002-41543705   | GLI3      | 0.0001 |
| CNVR447 | chr1:65312552-65486429   | STXBP5L   | 0.0001 |
| CNVR448 | chr1:117080432-117305709 | EIF2A     | 0.0001 |
| CNVR318 | chr17:42036353-42203324  | SCLT1     | 0.0001 |
| CNVR217 | chr4:4944393-5284323     | CCT8L2    | 0.0001 |
| CNVR217 | chr4:4944393-5284323     | KMT2C     | 0.0001 |

|         |                         |          |        |                                       |
|---------|-------------------------|----------|--------|---------------------------------------|
| CNVR214 | chr19:50562778-51053565 | BAIAP2   | 0.0000 |                                       |
| CNVR214 | chr19:50562778-51053565 | CHMP6    | 0.0000 |                                       |
| CNVR214 | chr19:50562778-51053565 | BAHCC1   | 0.0000 |                                       |
| CNVR214 | chr19:50562778-51053565 | SLC38A10 | 0.0000 |                                       |
| CNVR214 | chr19:50562778-51053565 | NDUFAF8  | 0.0000 |                                       |
| CNVR214 | chr19:50562778-51053565 | TEPSIN   | 0.0000 |                                       |
| CNVR214 | chr19:50562778-51053565 | AATK     | 0.0000 |                                       |
| CNVR214 | chr19:50562778-51053565 | RPTOR    | 0.0000 |                                       |
| CNVR214 | chr19:50562778-51053565 | FSCN2    | 0.0000 |                                       |
| CNVR164 | chr3:91572483-91671546  | TRIM33   | 0.0000 |                                       |
| CNVR166 | chr24:44428013-44670596 | SETBP1   | 0.0000 |                                       |
| CNVR165 | chr12:74843453-75000294 | VWA8     | 0.0000 |                                       |
| CNVR165 | chr12:74843453-75000294 | RGCC     | 0.0000 |                                       |
| CNVR165 | chr12:74843453-75000294 | NAA16    | 0.0000 |                                       |
| CNVR136 | chr18:46661188-46870162 | LSR      | 0.0000 |                                       |
| CNVR136 | chr18:46661188-46870162 | FXYD3    | 0.0000 |                                       |
| CNVR136 | chr18:46661188-46870162 | LGI4     | 0.0000 |                                       |
| CNVR136 | chr18:46661188-46870162 | FXYD1    | 0.0000 |                                       |
| CNVR136 | chr18:46661188-46870162 | FXYD5    | 0.0000 |                                       |
| CNVR136 | chr18:46661188-46870162 | USF2     | 0.0000 |                                       |
| CNVR136 | chr18:46661188-46870162 | HAMP     | 0.0000 |                                       |
| CNVR136 | chr18:46661188-46870162 | MAG      | 0.0000 |                                       |
| CNVR136 | chr18:46661188-46870162 | CD22     | 0.0000 |                                       |
| CNVR136 | chr18:46661188-46870162 | FXYD7    | 0.0000 |                                       |
| CNVR145 | chr17:74218-505483      | SMARCB1  | 0.0000 |                                       |
| CNVR145 | chr17:74218-505483      | MMP11    | 0.0000 |                                       |
| CNVR145 | chr17:74218-505483      | CHCHD10  | 0.0000 |                                       |
| CNVR145 | chr17:74218-505483      | VPREB3   | 0.0000 |                                       |
| CNVR145 | chr17:74218-505483      | ZNF70    | 0.0000 |                                       |
| CNVR145 | chr17:74218-505483      | SLC2A11  | 0.0000 |                                       |
| CNVR145 | chr17:74218-505483      | DERL3    | 0.0000 |                                       |
| CNVR349 | chr9:396876-500672      | CD109    | 0.0000 |                                       |
| CNVR350 | chr20:39628946-39783357 | C1QTNF3  | 0.0000 |                                       |
| CNVR350 | chr20:39628946-39783357 | AMACR    | 0.0000 |                                       |
| CNVR350 | chr20:39628946-39783357 | SLC45A2  | 0.0000 | Feather colour, sil chicken, h 000915 |
| CNVR242 | chr15:35838401-36088036 | DNHD1    | 0.0000 |                                       |
| CNVR242 | chr15:35838401-36088036 | RRP8     | 0.0000 |                                       |
| CNVR242 | chr15:35838401-36088036 | ILK      | 0.0000 |                                       |
| CNVR242 | chr15:35838401-36088036 | TAF10    | 0.0000 |                                       |
| CNVR242 | chr15:35838401-36088036 | TPP1     | 0.0000 | Neuronal ceroid liq dog 001472        |
| CNVR242 | chr15:35838401-36088036 | DCHS1    | 0.0000 |                                       |
| CNVR242 | chr15:35838401-36088036 | MRPL17   | 0.0000 |                                       |
| CNVR168 | chr15:5608842-5930468   | SLC39A13 | 0.0000 |                                       |
| CNVR168 | chr15:5608842-5930468   | SPI1     | 0.0000 |                                       |
| CNVR168 | chr15:5608842-5930468   | MYBPC3   | 0.0000 | Cardiomyopathy, f domestic c: 000515  |
| CNVR168 | chr15:5608842-5930468   | MADD     | 0.0000 |                                       |
| CNVR168 | chr15:5608842-5930468   | NR1H3    | 0.0000 |                                       |
| CNVR168 | chr15:5608842-5930468   | ACP2     | 0.0000 |                                       |

|         |                         |          |        |                        |        |
|---------|-------------------------|----------|--------|------------------------|--------|
| CNVR168 | chr15:5608842-5930468   | DDB2     | 0.0000 | Ocular squamous (horse | 000735 |
| CNVR168 | chr15:5608842-5930468   | PACSIN3  | 0.0000 |                        |        |
| CNVR168 | chr15:5608842-5930468   | ARFGAP2  | 0.0000 |                        |        |
| CNVR168 | chr15:5608842-5930468   | PTPMT1   | 0.0000 |                        |        |
| CNVR168 | chr15:5608842-5930468   | CELF1    | 0.0000 |                        |        |
| CNVR168 | chr15:5608842-5930468   | RAPSN    | 0.0000 |                        |        |
| CNVR168 | chr15:5608842-5930468   | PSMC3    | 0.0000 |                        |        |
| CNVR194 | chr27:26153207-26303880 | FGL1     | 0.0000 |                        |        |
| CNVR194 | chr27:26153207-26303880 | PCM1     | 0.0000 |                        |        |
| CNVR169 | chr6:77093393-78208186  | ADGRL3   | 0.0000 |                        |        |
| CNVR176 | chr28:39127-296360      | COG2     | 0.0000 |                        |        |
| CNVR176 | chr28:39127-296360      | AGT      | 0.0000 |                        |        |
| CNVR176 | chr28:39127-296360      | TFAM     | 0.0000 |                        |        |
| CNVR176 | chr28:39127-296360      | ZNF239   | 0.0000 |                        |        |
| CNVR176 | chr28:39127-296360      | ZNF485   | 0.0000 |                        |        |
| CNVR176 | chr28:39127-296360      | ZNF32    | 0.0000 |                        |        |
| CNVR146 | chr10:2200269-2598321   | FOXN3    | 0.0000 |                        |        |
| CNVR312 | chr7:70112141-70200667  | TRIM52   | 0.0000 |                        |        |
| CNVR313 | chr9:29486082-29566469  | SEC63    | 0.0000 |                        |        |
| CNVR315 | chr18:48814449-48943899 | SIPA1L3  | 0.0000 |                        |        |
| CNVR310 | chr1:62470077-64114313  | IGSF11   | 0.0000 |                        |        |
| CNVR310 | chr1:62470077-64114313  | UPK1B    | 0.0000 |                        |        |
| CNVR310 | chr1:62470077-64114313  | B4GALT4  | 0.0000 |                        |        |
| CNVR310 | chr1:62470077-64114313  | ARHGAP31 | 0.0000 |                        |        |
| CNVR310 | chr1:62470077-64114313  | TMEM39A  | 0.0000 |                        |        |
| CNVR310 | chr1:62470077-64114313  | POGLUT1  | 0.0000 |                        |        |
| CNVR310 | chr1:62470077-64114313  | TIMMDC1  | 0.0000 |                        |        |
| CNVR310 | chr1:62470077-64114313  | CD80     | 0.0000 |                        |        |
| CNVR310 | chr1:62470077-64114313  | ADPRH    | 0.0000 |                        |        |
| CNVR310 | chr1:62470077-64114313  | PLA1A    | 0.0000 |                        |        |
| CNVR310 | chr1:62470077-64114313  | POPDC2   | 0.0000 |                        |        |
| CNVR315 | chr18:48814449-48943899 | DPF1     | 0.0000 |                        |        |
| CNVR255 | chr18:8706364-8798129   | CDYL2    | 0.0000 |                        |        |
| CNVR256 | chr19:235092-741103     | CA10     | 0.0000 |                        |        |
| CNVR343 | chr18:2529845-2712383   | VSTM2B   | 0.0000 |                        |        |
| CNVR343 | chr18:2529845-2712383   | VAC14    | 0.0000 |                        |        |
| CNVR97  | chr16:18319045-18428267 | USH2A    | 0.0000 |                        |        |
| CNVR386 | chr19:55704333-55772253 | FADS6    | 0.0000 |                        |        |
| CNVR386 | chr19:55704333-55772253 | FDXR     | 0.0000 |                        |        |
| CNVR385 | chr10:14701696-14840022 | ZDHHC22  | 0.0000 |                        |        |
| CNVR230 | chr27:17039708-17141426 | NRG1     | 0.0000 |                        |        |
| CNVR386 | chr19:55704333-55772253 | GRIN2C   | 0.0000 |                        |        |
| CNVR386 | chr19:55704333-55772253 | OTOP2    | 0.0000 |                        |        |
| CNVR386 | chr19:55704333-55772253 | USH1G    | 0.0000 |                        |        |
| CNVR384 | chr3:42725005-42908776  | IL23R    | 0.0000 |                        |        |
| CNVR384 | chr3:42725005-42908776  | IL12RB2  | 0.0000 |                        |        |
| CNVR265 | chr4:51294352-51399600  | HOXA9    | 0.0000 |                        |        |
| CNVR265 | chr4:51294352-51399600  | HOXA4    | 0.0000 |                        |        |



|         |                          |         |        |          |         |        |
|---------|--------------------------|---------|--------|----------|---------|--------|
| CNVR265 | chr4:51294352-51399600   | HOXA5   | 0.0000 |          |         |        |
| CNVR265 | chr4:51294352-51399600   | HOXA6   | 0.0000 |          |         |        |
| CNVR265 | chr4:51294352-51399600   | HOXA10  | 0.0000 |          |         |        |
| CNVR265 | chr4:51294352-51399600   | HOXA11  | 0.0000 |          |         |        |
| CNVR265 | chr4:51294352-51399600   | HOXA13  | 0.0000 |          |         |        |
| CNVR266 | chr5:84823978-85109945   | SOX5    | 0.0000 | Pea comb | chicken | 000782 |
| CNVR265 | chr4:51294352-51399600   | HOXA7   | 0.0000 |          |         |        |
| CNVR228 | chr5:27802712-27884847   | SCN8A   | 0.0000 |          |         |        |
| CNVR257 | chr7:90025385-90322669   | NFIC    | 0.0000 |          |         |        |
| CNVR257 | chr7:90025385-90322669   | SMIM24  | 0.0000 |          |         |        |
| CNVR257 | chr7:90025385-90322669   | DOHH    | 0.0000 |          |         |        |
| CNVR257 | chr7:90025385-90322669   | FZR1    | 0.0000 |          |         |        |
| CNVR257 | chr7:90025385-90322669   | MFS12   | 0.0000 |          |         |        |
| CNVR257 | chr7:90025385-90322669   | HMG20B  | 0.0000 |          |         |        |
| CNVR257 | chr7:90025385-90322669   | GIPC3   | 0.0000 |          |         |        |
| CNVR257 | chr7:90025385-90322669   | TBXA2R  | 0.0000 |          |         |        |
| CNVR257 | chr7:90025385-90322669   | CACTIN  | 0.0000 |          |         |        |
| CNVR257 | chr7:90025385-90322669   | PIP5K1C | 0.0000 |          |         |        |
| CNVR257 | chr7:90025385-90322669   | TJP3    | 0.0000 |          |         |        |
| CNVR303 | chr7:3252633-3369561     | FBXL17  | 0.0000 |          |         |        |
| CNVR300 | chr29:47226927-47555144  | CPT1A   | 0.0000 |          |         |        |
| CNVR300 | chr29:47226927-47555144  | MRPL21  | 0.0000 |          |         |        |
| CNVR300 | chr29:47226927-47555144  | IGHMBP2 | 0.0000 |          |         |        |
| CNVR299 | chr18:65210864-65486835  | ZNF71   | 0.0000 |          |         |        |
| CNVR299 | chr18:65210864-65486835  | ZNF470  | 0.0000 |          |         |        |
| CNVR299 | chr18:65210864-65486835  | ZNF835  | 0.0000 |          |         |        |
| CNVR299 | chr18:65210864-65486835  | ZIM2    | 0.0000 |          |         |        |
| CNVR300 | chr29:47226927-47555144  | MRGPRF  | 0.0000 |          |         |        |
| CNVR300 | chr29:47226927-47555144  | TPCN2   | 0.0000 |          |         |        |
| CNVR299 | chr18:65210864-65486835  | ZNF582  | 0.0000 |          |         |        |
| CNVR299 | chr18:65210864-65486835  | SMIM17  | 0.0000 |          |         |        |
| CNVR247 | chr14:25153465-25341324  | ANGPT1  | 0.0000 |          |         |        |
| CNVR258 | chr5:27333941-27712849   | ACVRL1  | 0.0000 |          |         |        |
| CNVR258 | chr5:27333941-27712849   | ANKRD33 | 0.0000 |          |         |        |
| CNVR259 | chr5:115164525-115600990 | GTSE1   | 0.0000 |          |         |        |
| CNVR259 | chr5:115164525-115600990 | TRMU    | 0.0000 |          |         |        |
| CNVR259 | chr5:115164525-115600990 | CELSR1  | 0.0000 |          |         |        |
| CNVR258 | chr5:27333941-27712849   | KRT7    | 0.0000 |          |         |        |
| CNVR258 | chr5:27333941-27712849   | KRT80   | 0.0000 |          |         |        |
| CNVR258 | chr5:27333941-27712849   | NR4A1   | 0.0000 |          |         |        |
| CNVR258 | chr5:27333941-27712849   | GRASP   | 0.0000 |          |         |        |
| CNVR259 | chr5:115164525-115600990 | WNT7B   | 0.0000 |          |         |        |
| CNVR259 | chr5:115164525-115600990 | PPARA   | 0.0000 |          |         |        |
| CNVR259 | chr5:115164525-115600990 | CDPF1   | 0.0000 |          |         |        |
| CNVR259 | chr5:115164525-115600990 | TTC38   | 0.0000 |          |         |        |
| CNVR285 | chr24:9494224-9722054    | DSEL    | 0.0000 |          |         |        |
| CNVR284 | chr17:38453012-38660495  | FAT4    | 0.0000 |          |         |        |
| CNVR154 | chr12:12830122-12972454  | HS6ST3  | 0.0000 |          |         |        |

|         |                          |          |        |                       |        |
|---------|--------------------------|----------|--------|-----------------------|--------|
| CNVR464 | chr14:74744003-74857837  | ZFAT     | 0.0000 |                       |        |
| CNVR465 | chr27:20037103-20121377  | TNKS     | 0.0000 |                       |        |
| CNVR463 | chr9:32386763-33420904   | HACE1    | 0.0000 |                       |        |
| CNVR416 | chr14:62097501-62360121  | SNAI2    | 0.0000 |                       |        |
| CNVR416 | chr14:62097501-62360121  | EFCAB1   | 0.0000 |                       |        |
| CNVR414 | chr3:119822951-119954357 | TBX19    | 0.0000 |                       |        |
| CNVR415 | chr7:3581367-4029290     | FBXL17   | 0.0000 |                       |        |
| CNVR415 | chr7:3581367-4029290     | EFNA5    | 0.0000 |                       |        |
| CNVR346 | chr8:106064518-107517395 | ASTN2    | 0.0000 |                       |        |
| CNVR346 | chr8:106064518-107517395 | TLR4     | 0.0000 |                       |        |
| CNVR347 | chr13:78318677-78381686  | BCAS4    | 0.0000 |                       |        |
| CNVR347 | chr13:78318677-78381686  | ADNP     | 0.0000 |                       |        |
| CNVR347 | chr13:78318677-78381686  | DPM1     | 0.0000 |                       |        |
| CNVR248 | chr5:117088390-117521581 | FAM19A5  | 0.0000 |                       |        |
| CNVR466 | chr13:24195550-24309944  | KIAA1217 | 0.0000 |                       |        |
| CNVR469 | chr25:10390946-10683032  | SNX29    | 0.0000 |                       |        |
| CNVR470 | chr26:38650363-38895843  | ANKRD1   | 0.0000 |                       |        |
| CNVR470 | chr26:38650363-38895843  | RPP30    | 0.0000 |                       |        |
| CNVR470 | chr26:38650363-38895843  | HTR7     | 0.0000 |                       |        |
| CNVR469 | chr25:10390946-10683032  | RSL1D1   | 0.0000 |                       |        |
| CNVR469 | chr25:10390946-10683032  | GSPT1    | 0.0000 |                       |        |
| CNVR469 | chr25:10390946-10683032  | TNFRSF17 | 0.0000 |                       |        |
| CNVR321 | chr11:45481199-45558959  | NCK2     | 0.0000 |                       |        |
| CNVR322 | chr19:30448531-30753332  | MAP2K4   | 0.0000 |                       |        |
| CNVR320 | chr7:104253379-104360706 | CRTC1    | 0.0000 |                       |        |
| CNVR320 | chr7:104253379-104360706 | COMP     | 0.0000 |                       |        |
| CNVR345 | chr23:2071807-2490261    | RREB1    | 0.0000 |                       |        |
| CNVR345 | chr23:2071807-2490261    | SSR1     | 0.0000 |                       |        |
| CNVR345 | chr23:2071807-2490261    | CAGE1    | 0.0000 |                       |        |
| CNVR345 | chr23:2071807-2490261    | RIOK1    | 0.0000 |                       |        |
| CNVR237 | chr10:98022960-98449048  | KCNN2    | 0.0000 |                       |        |
| CNVR239 | chr18:8987420-9126400    | CMC2     | 0.0000 |                       |        |
| CNVR239 | chr18:8987420-9126400    | CENPN    | 0.0000 | Male body size/coi:0  | 001890 |
| CNVR239 | chr18:8987420-9126400    | ATMIN    | 0.0000 |                       |        |
| CNVR239 | chr18:8987420-9126400    | GCSH     | 0.0000 |                       |        |
| CNVR239 | chr18:8987420-9126400    | PKD1L2   | 0.0000 |                       |        |
| CNVR243 | chr27:7799490-8104972    | INTS10   | 0.0000 |                       |        |
| CNVR243 | chr27:7799490-8104972    | HGSNAT   | 0.0000 |                       |        |
| CNVR243 | chr27:7799490-8104972    | POMK     | 0.0000 |                       |        |
| CNVR243 | chr27:7799490-8104972    | FNTA     | 0.0000 |                       |        |
| CNVR243 | chr27:7799490-8104972    | HOOK3    | 0.0000 |                       |        |
| CNVR243 | chr27:7799490-8104972    | RNF170   | 0.0000 |                       |        |
| CNVR243 | chr27:7799490-8104972    | THAP1    | 0.0000 |                       |        |
| CNVR243 | chr27:7799490-8104972    | CHRNA6   | 0.0000 |                       |        |
| CNVR233 | chr22:40272340-40680180  | FHIT     | 0.0000 |                       |        |
| CNVR324 | chr2:1092751-1252561     | ACTL8    | 0.0000 |                       |        |
| CNVR473 | chr1:145490260-145685578 | PCBP3    | 0.0000 |                       |        |
| CNVR473 | chr1:145490260-145685578 | COL6A1   | 0.0000 | Muscular dystroph dog | 001967 |

|         |                          |          |        |
|---------|--------------------------|----------|--------|
| CNVR477 | chr13:46473134-46564147  | PRND     | 0.0000 |
| CNVR477 | chr13:46473134-46564147  | RASSF2   | 0.0000 |
| CNVR472 | chr1:51773599-51885520   | CCDC54   | 0.0000 |
| CNVR474 | chr7:106110228-106197569 | OBSCN    | 0.0000 |
| CNVR474 | chr7:106110228-106197569 | TRIM11   | 0.0000 |
| CNVR474 | chr7:106110228-106197569 | TRIM17   | 0.0000 |
| CNVR478 | chr18:15731228-16041888  | ANKRD11  | 0.0000 |
| CNVR478 | chr18:15731228-16041888  | SPG7     | 0.0000 |
| CNVR478 | chr18:15731228-16041888  | RPL13    | 0.0000 |
| CNVR478 | chr18:15731228-16041888  | CPNE7    | 0.0000 |
| CNVR478 | chr18:15731228-16041888  | DPEP1    | 0.0000 |
| CNVR478 | chr18:15731228-16041888  | CHMP1A   | 0.0000 |
| CNVR478 | chr18:15731228-16041888  | CDK10    | 0.0000 |
| CNVR478 | chr18:15731228-16041888  | SPATA2L  | 0.0000 |
| CNVR478 | chr18:15731228-16041888  | ZNF276   | 0.0000 |
| CNVR478 | chr18:15731228-16041888  | VPS9D1   | 0.0000 |
| CNVR478 | chr18:15731228-16041888  | FANCA    | 0.0000 |
| CNVR475 | chr12:60430663-60468859  | NBEA     | 0.0000 |
| CNVR471 | chr1:2098171-2158790     | HUNK     | 0.0000 |
| CNVR250 | chr10:89474226-89635086  | TXNDC16  | 0.0000 |
| CNVR409 | chr25:39448969-39826136  | FBXL18   | 0.0000 |
| CNVR409 | chr25:39448969-39826136  | TNRC18   | 0.0000 |
| CNVR406 | chr21:57123881-57189534  | ITPK1    | 0.0000 |
| CNVR404 | chr17:1656773-1789018    | OSBP2    | 0.0000 |
| CNVR398 | chr4:1133055-1438909     | DNAJB6   | 0.0000 |
| CNVR398 | chr4:1133055-1438909     | UBE3C    | 0.0000 |
| CNVR404 | chr17:1656773-1789018    | DUSP18   | 0.0000 |
| CNVR404 | chr17:1656773-1789018    | SLC35E4  | 0.0000 |
| CNVR404 | chr17:1656773-1789018    | TCN2     | 0.0000 |
| CNVR410 | chr28:1291282-1906009    | ZNF22    | 0.0000 |
| CNVR410 | chr28:1291282-1906009    | ALOX5    | 0.0000 |
| CNVR410 | chr28:1291282-1906009    | MARCH8   | 0.0000 |
| CNVR410 | chr28:1291282-1906009    | ZFAND4   | 0.0000 |
| CNVR410 | chr28:1291282-1906009    | MSMB     | 0.0000 |
| CNVR410 | chr28:1291282-1906009    | NCOA4    | 0.0000 |
| CNVR410 | chr28:1291282-1906009    | PARG     | 0.0000 |
| CNVR404 | chr17:1656773-1789018    | PES1     | 0.0000 |
| CNVR404 | chr17:1656773-1789018    | GAL3ST1  | 0.0000 |
| CNVR405 | chr19:23467961-23660587  | RAP1GAP2 | 0.0000 |
| CNVR407 | chr23:41957169-42101312  | LRRC1    | 0.0000 |
| CNVR399 | chr9:84026367-84168050   | MAP3K4   | 0.0000 |
| CNVR399 | chr9:84026367-84168050   | AGPAT4   | 0.0000 |
| CNVR397 | chr2:2669806-2791630     | CAPZB    | 0.0000 |
| CNVR398 | chr4:1133055-1438909     | PTPRN2   | 0.0000 |
| CNVR409 | chr25:39448969-39826136  | RNF216   | 0.0000 |
| CNVR409 | chr25:39448969-39826136  | FSCN1    | 0.0000 |
| CNVR261 | chr21:29862147-30105662  | ADAMTS7  | 0.0000 |
| CNVR261 | chr21:29862147-30105662  | TBC1D2B  | 0.0000 |

|         |                          |          |        |
|---------|--------------------------|----------|--------|
| CNVR261 | chr21:29862147-30105662  | SH2D7    | 0.0000 |
| CNVR261 | chr21:29862147-30105662  | CIB2     | 0.0000 |
| CNVR262 | chr27:38760409-39014362  | AGPAT5   | 0.0000 |
| CNVR262 | chr27:38760409-39014362  | MCPH1    | 0.0000 |
| CNVR262 | chr27:38760409-39014362  | ANGPT2   | 0.0000 |
| CNVR387 | chr8:35663210-37174118   | PTPRD    | 0.0000 |
| CNVR387 | chr8:35663210-37174118   | TMEM261  | 0.0000 |
| CNVR235 | chr17:64068530-64323042  | SH3D19   | 0.0000 |
| CNVR234 | chr9:20737498-21566008   | TRAPPC3L | 0.0000 |
| CNVR234 | chr9:20737498-21566008   | FAM26D   | 0.0000 |
| CNVR234 | chr9:20737498-21566008   | FAM26E   | 0.0000 |
| CNVR234 | chr9:20737498-21566008   | DSE      | 0.0000 |
| CNVR235 | chr17:64068530-64323042  | RPS3A    | 0.0000 |
| CNVR234 | chr9:20737498-21566008   | RFX6     | 0.0000 |
| CNVR234 | chr9:20737498-21566008   | GPRC6A   | 0.0000 |
| CNVR234 | chr9:20737498-21566008   | FAM162B  | 0.0000 |
| CNVR234 | chr9:20737498-21566008   | KPNA5    | 0.0000 |
| CNVR234 | chr9:20737498-21566008   | ZUFSP    | 0.0000 |
| CNVR234 | chr9:20737498-21566008   | RSPH4A   | 0.0000 |
| CNVR234 | chr9:20737498-21566008   | RWDD1    | 0.0000 |
| CNVR381 | chr19:55170877-55248676  | MYO15B   | 0.0000 |
| CNVR381 | chr19:55170877-55248676  | LLGL2    | 0.0000 |
| CNVR377 | chr1:17210656-17415477   | TMPRSS15 | 0.0000 |
| CNVR377 | chr1:17210656-17415477   | CHODL    | 0.0000 |
| CNVR381 | chr19:55170877-55248676  | TSEN54   | 0.0000 |
| CNVR309 | chr14:23966505-24313452  | OXR1     | 0.0000 |
| CNVR307 | chr3:28933652-29229387   | FAM151A  | 0.0000 |
| CNVR307 | chr3:28933652-29229387   | MROH7    | 0.0000 |
| CNVR307 | chr3:28933652-29229387   | SSBP3    | 0.0000 |
| CNVR307 | chr3:28933652-29229387   | ACOT11   | 0.0000 |
| CNVR307 | chr3:28933652-29229387   | TTC4     | 0.0000 |
| CNVR293 | chr6:111173170-111320579 | BST1     | 0.0000 |
| CNVR293 | chr6:111173170-111320579 | CD38     | 0.0000 |
| CNVR297 | chr29:40885662-40988733  | INCENP   | 0.0000 |
| CNVR296 | chr16:34261365-34856843  | RGS7     | 0.0000 |
| CNVR296 | chr16:34261365-34856843  | DPT      | 0.0000 |
| CNVR304 | chr1:86399837-86897861   | PEX5L    | 0.0000 |
| CNVR391 | chr3:91757813-92185077   | BCAS2    | 0.0000 |
| CNVR391 | chr3:91757813-92185077   | TRIM33   | 0.0000 |
| CNVR391 | chr3:91757813-92185077   | DENND2C  | 0.0000 |
| CNVR391 | chr3:91757813-92185077   | AMPD1    | 0.0000 |
| CNVR391 | chr3:91757813-92185077   | NRAS     | 0.0000 |
| CNVR391 | chr3:91757813-92185077   | CSDE1    | 0.0000 |
| CNVR391 | chr3:91757813-92185077   | SIKE1    | 0.0000 |
| CNVR391 | chr3:91757813-92185077   | SYCP1    | 0.0000 |
| CNVR395 | chr13:18059828-18184118  | PARD3    | 0.0000 |
| CNVR389 | chr2:77689797-77936509   | NXPH2    | 0.0000 |
| CNVR245 | chr16:28745323-28806039  | CDC42BPA | 0.0000 |

|         |                          |          |        |
|---------|--------------------------|----------|--------|
| CNVR290 | chr19:46093124-46359942  | EFCAB13  | 0.0000 |
| CNVR288 | chr10:19055481-19292195  | RGS6     | 0.0000 |
| CNVR361 | chr8:44145214-44275969   | PGM5     | 0.0000 |
| CNVR369 | chr29:7961794-8204164    | TMEM135  | 0.0000 |
| CNVR369 | chr29:7961794-8204164    | FZD4     | 0.0000 |
| CNVR369 | chr29:7961794-8204164    | PRSS23   | 0.0000 |
| CNVR363 | chr13:22309944-22485237  | DNAJC1   | 0.0000 |
| CNVR362 | chr11:81442804-81554962  | FAM49A   | 0.0000 |
| CNVR353 | chr2:1758747-2042704     | IGSF21   | 0.0000 |
| CNVR353 | chr2:1758747-2042704     | KLHDC7A  | 0.0000 |
| CNVR356 | chr4:18303133-18647771   | AKR1D1   | 0.0000 |
| CNVR364 | chr18:31006944-31313904  | CDH8     | 0.0000 |
| CNVR366 | chr20:17556315-17994385  | ZSWIM6   | 0.0000 |
| CNVR359 | chr5:106344987-106417783 | B4GALNT3 | 0.0000 |
| CNVR359 | chr5:106344987-106417783 | NINJ2    | 0.0000 |
| CNVR353 | chr2:1758747-2042704     | PAX7     | 0.0000 |
| CNVR365 | chr19:12506519-12732195  | PIGW     | 0.0000 |
| CNVR365 | chr19:12506519-12732195  | GGNBP2   | 0.0000 |
| CNVR365 | chr19:12506519-12732195  | DHRS11   | 0.0000 |
| CNVR365 | chr19:12506519-12732195  | MRM1     | 0.0000 |
| CNVR363 | chr13:22309944-22485237  | MLLT10   | 0.0000 |
| CNVR354 | chr2:15535722-15579358   | EIF4E2   | 0.0000 |
| CNVR354 | chr2:15535722-15579358   | CHRNA    | 0.0000 |
| CNVR354 | chr2:15535722-15579358   | CHRNA    | 0.0000 |
| CNVR354 | chr2:15535722-15579358   | PRSS56   | 0.0000 |
| CNVR365 | chr19:12506519-12732195  | MYO19    | 0.0000 |
| CNVR355 | chr2:71957883-72052161   | NCKAP5   | 0.0000 |
| CNVR419 | chr6:4703293-4770730     | NDNF     | 0.0000 |
| CNVR418 | chr3:109732251-109851137 | APCS     | 0.0000 |
| CNVR426 | chr28:42426843-43007895  | PGBD5    | 0.0000 |
| CNVR426 | chr28:42426843-43007895  | GALNT2   | 0.0000 |
| CNVR424 | chr18:54743018-54889434  | PNMAL2   | 0.0000 |
| CNVR421 | chr9:50121735-50459034   | HTR1E    | 0.0000 |
| CNVR420 | chr7:15423801-15497158   | GLRX     | 0.0000 |
| CNVR420 | chr7:15423801-15497158   | RHOBTB3  | 0.0000 |
| CNVR422 | chr13:2044451-2190267    | PLCB4    | 0.0000 |
| CNVR423 | chr18:9453551-9690202    | CMIP     | 0.0000 |
| CNVR423 | chr18:9453551-9690202    | PLCG2    | 0.0000 |
| CNVR424 | chr18:54743018-54889434  | CALM3    | 0.0000 |
| CNVR424 | chr18:54743018-54889434  | PTGIR    | 0.0000 |
| CNVR424 | chr18:54743018-54889434  | GNG8     | 0.0000 |
| CNVR424 | chr18:54743018-54889434  | DACT3    | 0.0000 |
| CNVR424 | chr18:54743018-54889434  | PRKD2    | 0.0000 |
| CNVR424 | chr18:54743018-54889434  | STRN4    | 0.0000 |
| CNVR351 | chr2:106396405-106982191 | SCN7A    | 0.0000 |
| CNVR326 | chr1:151473735-151889069 | COL6A6   | 0.0000 |
| CNVR326 | chr1:151473735-151889069 | COL6A5   | 0.0000 |
| CNVR327 | chr19:48288710-48434600  | DDX5     | 0.0000 |

|         |                           |          |        |
|---------|---------------------------|----------|--------|
| CNVR327 | chr19:48288710-48434600   | CEP95    | 0.0000 |
| CNVR327 | chr19:48288710-48434600   | SMURF2   | 0.0000 |
| CNVR329 | chr1:60778734-60981901    | LSAMP    | 0.0000 |
| CNVR331 | chr18:19464739-19597811   | CBLN1    | 0.0000 |
| CNVR489 | chr11:100809850-101015235 | NUP214   | 0.0000 |
| CNVR489 | chr11:100809850-101015235 | FAM78A   | 0.0000 |
| CNVR489 | chr11:100809850-101015235 | PLPP7    | 0.0000 |
| CNVR492 | chr22:23261616-23357142   | CNTN4    | 0.0000 |
| CNVR483 | chr1:116439841-116586239  | MED12L   | 0.0000 |
| CNVR483 | chr1:116439841-116586239  | P2RY14   | 0.0000 |
| CNVR483 | chr1:116439841-116586239  | GPR171   | 0.0000 |
| CNVR486 | chr3:62798489-63065701    | ZNHIT6   | 0.0000 |
| CNVR486 | chr3:62798489-63065701    | COL24A1  | 0.0000 |
| CNVR429 | chr8:4995390-5137151      | GALNTL6  | 0.0000 |
| CNVR438 | chr21:14633-668305        | MKRN3    | 0.0000 |
| CNVR433 | chr13:33158183-33268885   | ZEB1     | 0.0000 |
| CNVR437 | chr19:14788994-14997280   | CCT6B    | 0.0000 |
| CNVR430 | chr10:316360-560771       | CTDSPL2  | 0.0000 |
| CNVR430 | chr10:316360-560771       | CASC4    | 0.0000 |
| CNVR427 | chr2:35993258-36210898    | ERBB4    | 0.0000 |
| CNVR438 | chr21:14633-668305        | MAGEL2   | 0.0000 |
| CNVR438 | chr21:14633-668305        | NDN      | 0.0000 |
| CNVR439 | chr22:50009204-50272048   | CACNA2D2 | 0.0000 |
| CNVR439 | chr22:50009204-50272048   | TMEM115  | 0.0000 |
| CNVR439 | chr22:50009204-50272048   | NPRL2    | 0.0000 |
| CNVR439 | chr22:50009204-50272048   | ZMYND10  | 0.0000 |
| CNVR439 | chr22:50009204-50272048   | RASSF1   | 0.0000 |
| CNVR439 | chr22:50009204-50272048   | TUSC2    | 0.0000 |
| CNVR439 | chr22:50009204-50272048   | HYAL2    | 0.0000 |
| CNVR439 | chr22:50009204-50272048   | HYAL1    | 0.0000 |
| CNVR439 | chr22:50009204-50272048   | HYAL3    | 0.0000 |
| CNVR439 | chr22:50009204-50272048   | IFRD2    | 0.0000 |
| CNVR439 | chr22:50009204-50272048   | LSMEM2   | 0.0000 |
| CNVR439 | chr22:50009204-50272048   | SEMA3B   | 0.0000 |
| CNVR439 | chr22:50009204-50272048   | SLC38A3  | 0.0000 |
| CNVR439 | chr22:50009204-50272048   | GNAT1    | 0.0000 |
| CNVR439 | chr22:50009204-50272048   | SEMA3F   | 0.0000 |
| CNVR439 | chr22:50009204-50272048   | NAT6     | 0.0000 |
| CNVR518 | chr21:16173546-16336056   | AGBL1    | 0.0000 |
| CNVR515 | chr15:68508002-68596370   | JRKL     | 0.0000 |
| CNVR517 | chr16:66515022-66662197   | PLA2G4A  | 0.0000 |
| CNVR524 | chr26:11211500-11440790   | PLPP4    | 0.0000 |
| CNVR498 | chr2:32998411-33072221    | BARD1    | 0.0000 |
| CNVR523 | chr24:20260350-20444877   | KIAA1328 | 0.0000 |
| CNVR521 | chr23:28418703-28691044   | TNFRSF21 | 0.0000 |
| CNVR510 | chr12:62909764-62977761   | UFM1     | 0.0000 |
| CNVR503 | chr6:37898813-38091505    | NCAPG    | 0.0000 |
| CNVR497 | chr1:91434395-91550506    | NAALADL2 | 0.0000 |

|         |                         |        |        |
|---------|-------------------------|--------|--------|
| CNVR519 | chr22:25265396-25939055 | CHL1   | 0.0000 |
| CNVR499 | chr2:63569208-63676418  | GLI2   | 0.0000 |
| CNVR507 | chr10:88946391-89011933 | IGDCC3 | 0.0000 |
| CNVR503 | chr6:37898813-38091505  | LCORL  | 0.0000 |
| CNVR516 | chr16:28987486-29263185 | AHCTF1 | 0.0000 |
| CNVR516 | chr16:28987486-29263185 | SCCPDH | 0.0000 |
| CNVR516 | chr16:28987486-29263185 | CNST   | 0.0000 |
| CNVR511 | chr13:16583614-16678458 | CAMK1D | 0.0000 |
| CNVR512 | chr14:8630351-8780447   | TMEM64 | 0.0000 |

---

**Comment:**

CHR: chromosome

START: Start coordinate

END: End coordinate

Gene: Gene name overlapped with this CNVR

VAR: Variance

CNV count: CNV count within this CNVR for each group

SEA: Southeastern Africa group

NWA: Northwestern Africa group

MAD: Madagascar group

WAS: Western Asia group

EME: Eastern Mediterranean group

ANE: Alpine & Northern Europe group

Color filled: CNV overlapped genes with VAR > 0.01
