# Supplementary material
Source: PubMed Central journal article supplement (PMC6462038)
Supplement: 41437_2018_150_MOESM7_ESM.pdf [file 41437_2018_150_MOESM7_ESM.pdf]

Supplementary Table S5 Gene Ontology terms generated by PANTHER analysis

| <b>GO molecular function complete</b>                     | <b>Bos taurus (REF)</b> | <b>Goat (observed)</b> | <b>expected</b> | <b>Fold Enrichment</b> | <b>+/-</b> | <b>P value</b> |
|-----------------------------------------------------------|-------------------------|------------------------|-----------------|------------------------|------------|----------------|
| <u>G-protein coupled receptor activity</u>                | 1361                    | 31                     | 89.37           | 0.35                   | -          | 5.34E-10       |
| <u>transmembrane signaling receptor activity</u>          | 1675                    | 54                     | 109.99          | 0.49                   | -          | 1.62E-06       |
| <u>transmembrane receptor activity</u>                    | 1711                    | 55                     | 112.35          | 0.49                   | -          | 9.18E-07       |
| <u>receptor activity</u>                                  | 1935                    | 65                     | 127.06          | 0.51                   | -          | 4.48E-07       |
| <u>molecular transducer activity</u>                      | 1970                    | 66                     | 129.36          | 0.51                   | -          | 2.63E-07       |
| <u>signaling receptor activity</u>                        | 1757                    | 60                     | 115.37          | 0.52                   | -          | 6.94E-06       |
| <u>signal transducer activity</u>                         | 1988                    | 84                     | 130.54          | 0.64                   | -          | 8.37E-03       |
| <u>binding</u>                                            | 10951                   | 800                    | 719.09          | 1.11                   | +          | 9.59E-03       |
| <b>GO biological process complete</b>                     |                         |                        |                 |                        |            |                |
| <u>chordate embryonic development</u>                     | 503                     | 62                     | 33.03           | 1.88                   | +          | 2.29E-02       |
| <u>embryo development ending in birth or egg hatching</u> | 508                     | 62                     | 33.36           | 1.86                   | +          | 3.09E-02       |
| <u>multicellular organism development</u>                 | 3337                    | 286                    | 219.12          | 1.31                   | +          | 7.57E-03       |
| <u>anatomical structure development</u>                   | 3667                    | 320                    | 240.79          | 1.33                   | +          | 2.26E-04       |
| <u>developmental process</u>                              | 3920                    | 337                    | 257.4           | 1.31                   | +          | 3.83E-04       |
| <u>system development</u>                                 | 2985                    | 263                    | 196.01          | 1.34                   | +          | 2.72E-03       |
| <u>negative regulation of cellular process</u>            | 3458                    | 290                    | 227.07          | 1.28                   | +          | 3.65E-02       |
| <u>cellular macromolecule metabolic process</u>           | 4888                    | 393                    | 320.97          | 1.22                   | +          | 2.55E-02       |
| <u>cellular metabolic process</u>                         | 6535                    | 510                    | 429.12          | 1.19                   | +          | 1.14E-02       |
| <u>nitrogen compound metabolic process</u>                | 6159                    | 479                    | 404.43          | 1.18                   | +          | 4.69E-02       |
| <u>primary metabolic process</u>                          | 6671                    | 515                    | 438.05          | 1.18                   | +          | 3.64E-02       |
| <u>G-protein coupled receptor signaling pathway</u>       | 1603                    | 47                     | 105.26          | 0.45                   | -          | 2.65E-07       |
| <u>sensory perception</u>                                 | 1309                    | 18                     | 85.95           | 0.21                   | -          | 6.87E-16       |
| <u>nervous system process</u>                             | 1548                    | 39                     | 101.65          | 0.38                   | -          | 1.55E-09       |
| <u>system process</u>                                     | 1917                    | 70                     | 125.88          | 0.56                   | -          | 7.59E-05       |
| <u>detection of stimulus</u>                              | 1099                    | 8                      | 72.17           | <0.2                   | -          | 1.32E-18       |
| <b>GO cellular component complete</b>                     |                         |                        |                 |                        |            |                |
| <u>macromolecular complex</u>                             | 4472                    | 356                    | 293.65          | 1.21                   | +          | 3.65E-02       |
| <u>cytoplasmic part</u>                                   | 6582                    | 511                    | 432.2           | 1.18                   | +          | 3.43E-03       |
| <u>intracellular part</u>                                 | 11457                   | 870                    | 752.32          | 1.16                   | +          | 2.57E-08       |
| <u>intracellular</u>                                      | 11972                   | 909                    | 786.13          | 1.16                   | +          | 1.82E-09       |
| <u>cell part</u>                                          | 14404                   | 1022                   | 945.83          | 1.08                   | +          | 1.34E-03       |
| <u>cell</u>                                               | 14447                   | 1024                   | 948.65          | 1.08                   | +          | 1.64E-03       |
| <u>cytoplasm</u>                                          | 8511                    | 645                    | 558.87          | 1.15                   | +          | 1.22E-03       |
| <u>intracellular membrane-bounded organelle</u>           | 8380                    | 650                    | 550.27          | 1.18                   | +          | 2.17E-05       |
| <u>intracellular organelle</u>                            | 9885                    | 746                    | 649.09          | 1.15                   | +          | 6.31E-05       |
| <u>organelle</u>                                          | 10842                   | 831                    | 711.93          | 1.17                   | +          | 2.44E-08       |
| <u>membrane-bounded organelle</u>                         | 9844                    | 765                    | 646.4           | 1.18                   | +          | 4.31E-08       |
| <u>intracellular organelle part</u>                       | 6466                    | 498                    | 424.59          | 1.17                   | +          | 1.31E-02       |
| <u>organelle part</u>                                     | 6638                    | 514                    | 435.88          | 1.18                   | +          | 4.29E-03       |
