# Supplementary material
Source: PubMed Central journal article supplement (PMC6462038)
Supplement: 41437_2018_150_MOESM8_ESM.pdf [file 41437_2018_150_MOESM8_ESM.pdf]

**Supplementary Table S6 Analysis for overlap CNV regions between previous study (Fontanesi et al. 2010) and our study (minMatch=0.1)**

| CNVR in Fontanesi et al. 2009 |       | Btau_4.0 assembly |                       | ARS1 assembly | CNVR Length | CNVR in our study            |
|-------------------------------|-------|-------------------|-----------------------|---------------|-------------|------------------------------|
| CNVR2                         | chr2  | 18807030          | 18856731 NC_030809.1  | 118002721     | 118049884   | 47164                        |
| CNVR3                         | chr2  | 21497308          | 21546488 NC_030809.1  | 115439540     | 115487073   | 47534                        |
| CNVR4                         | chr2  | 21577568          | 21602367 NC_030809.1  | 115380279     | 115402147   | 21869                        |
| CNVR5                         | chr2  | 32041340          | 32086797 NC_030809.1  | 105226106     | 105267217   | 41112                        |
| CNVR7                         | chr2  | 47254402          | 47288185 NC_030809.1  | 91154855      | 91184188    | 29334                        |
| CNVR10                        | chr2  | 120008382         | 120058529 NC_030809.1 | 20313540      | 20327973    | 14434                        |
| CNVR12                        | chr3  | 24817768          | 24849277 NC_030810.1  | 97566331      | 97581000    | 14670                        |
| CNVR13                        | chr3  | 57261212          | 57330804 NC_030810.1  | 66735184      | 66761277    | 26094                        |
| CNVR17                        | chr3  | 73927709          | 74060684 NC_030810.1  | 51681000      | 52010724    | 329725                       |
| CNVR19                        | chr3  | 83548804          | 83595646 NC_030810.1  | 43008506      | 43042333    | 33828                        |
| CNVR20                        | chr3  | 84740970          | 84778193 NC_030810.1  | 41856064      | 41883864    | 27801                        |
| CNVR21                        | chr3  | 104764579         | 104840360 NC_030810.1 | 22903283      | 22961868    | 58586                        |
| CNVR24                        | chr4  | 31492904          | 31533570 NC_030811.1  | 90312291      | 90347933    | 35643                        |
| CNVR27                        | chr5  | 61831588          | 61870954 NC_030812.1  | 56661245      | 56680102    | 18858                        |
| CNVR28                        | chr5  | 72405811          | 72449214 NC_030812.1  | 66094433      | 66122836    | 28404                        |
| CNVR29                        | chr5  | 74632359          | 74700808 NC_030812.1  | 68184062      | 68240865    | 56804                        |
| CNVR30                        | chr5  | 75203431          | 75278020 NC_030812.1  | 68748005      | 68822627    | 74623                        |
| CNVR32                        | chr5  | 81643010          | 81712719 NC_030812.1  | 74558265      | 74619159    | 60895                        |
| CNVR38                        | chr6  | 37733199          | 37764001 NC_030813.1  | 37473549      | 37486538    | 12990                        |
| CNVR40                        | chr6  | 70754348          | 70806182 NC_030813.1  | 68013518      | 68050899    | 37382                        |
| CNVR42                        | chr7  | 34163801          | 34215485 NC_030814.1  | 75533394      | 75570672    | 37279                        |
| CNVR43                        | chr7  | 60968500          | 61061601 NC_030814.1  | 48837425      | 48926592    | 89168                        |
| CNVR46                        | chr8  | 64093506          | 64176990 NC_030815.1  | 60996374      | 61055872    | 59499                        |
| CNVR49                        | chr8  | 89024712          | 89049599 NC_030815.1  | 84612194      | 84623987    | 11794                        |
| CNVR51                        | chr8  | 99926374          | 99969779 NC_030815.1  | 94953046      | 94990100    | 37055                        |
| CNVR55                        | chr9  | 60463602          | 60495112 NC_030816.1  | 45081315      | 45092925    | 11611                        |
| CNVR56                        | chr9  | 75830087          | 75873587 NC_030816.1  | 60705074      | 60749887    | 44814                        |
| CNVR59                        | chr10 | 14322309          | 14353306 NC_030817.1  | 86800667      | 86825703    | 25037                        |
| CNVR71                        | chr13 | 25519304          | 25550840 NC_030820.1  | 25353159      | 25370912    | 17754                        |
| CNVR77                        | chr14 | 34358804          | 34389901 NC_030821.1  | 48029297      | 48038388    | 9092                         |
| CNVR81                        | chr15 | 27899938          | 27968219 NC_030822.1  | 52829871      | 52877988    | 48118                        |
| CNVR83                        | chr15 | 50726505          | 50751303 NC_030822.1  | 32119562      | 32141426    | 21865                        |
| CNVR84                        | chr15 | 54311184          | 54361583 NC_030822.1  | 28233263      | 28265916    | 32654                        |
| CNVR85                        | chr15 | 59007340          | 59044565 NC_030822.1  | 23532440      | 23552233    | 19794                        |
| CNVR87                        | chr16 | 33150610          | 33181900 NC_030823.1  | 34326169      | 34331914    | 5746 chr16:34261365-34856843 |
| CNVR92                        | chr17 | 65294601          | 65338105 NC_030824.1  | 9018217       | 9060551     | 42335                        |
| CNVR99                        | chr22 | 43926680          | 43951800 NC_030829.1  | 43020000      | 43037995    | 17996                        |
| CNVR100                       | chr22 | 45770738          | 45814880 NC_030829.1  | 44703568      | 44751800    | 48233                        |
| CNVR101                       | chr22 | 48819396          | 48844001 NC_030829.1  | 47694096      | 47710445    | 16350                        |
| CNVR104                       | chr23 | 9918524           | 9955791 NC_030830.1   | 39030509      | 39037494    | 6986                         |
| CNVR105                       | chr23 | 12684676          | 12849523 NC_030830.1  | 36442063      | 36606294    | 164232                       |
| CNVR108                       | chr23 | 27873397          | 27911876 NC_030830.1  | 22081736      | 22133760    | 52025                        |
