# Supplementary material
Source: PubMed Central journal article supplement (PMC6462038)

**A**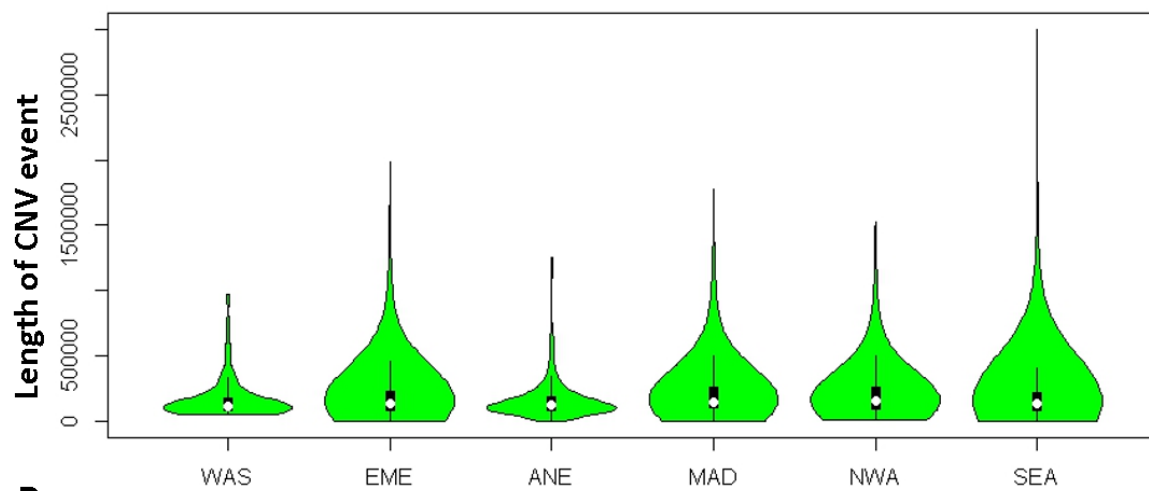**B**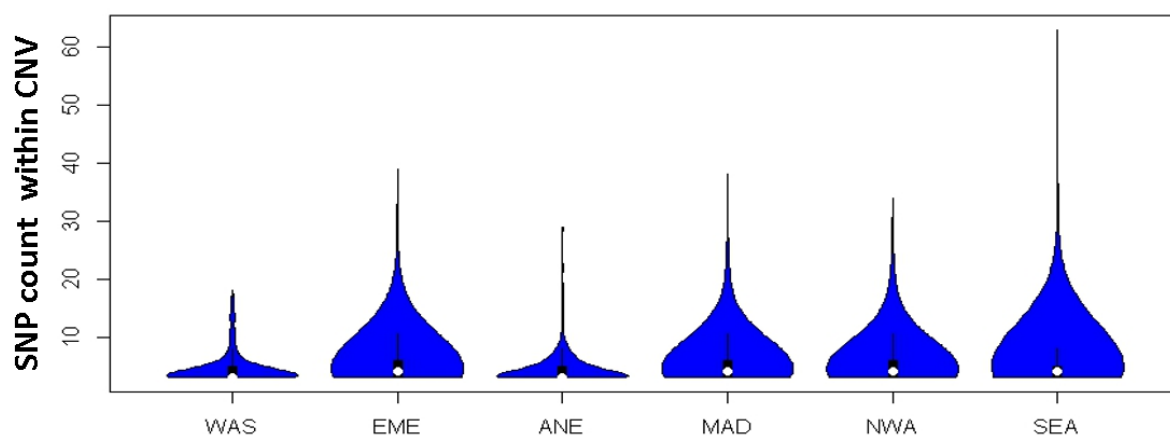

Supplement: 41437_2018_150_MOESM1_ESM.pdf [file 41437_2018_150_MOESM1_ESM.pdf]

**A**

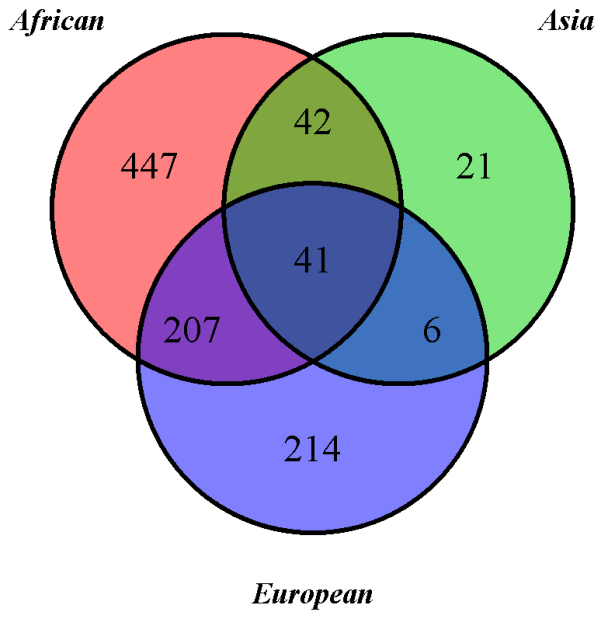

**B**

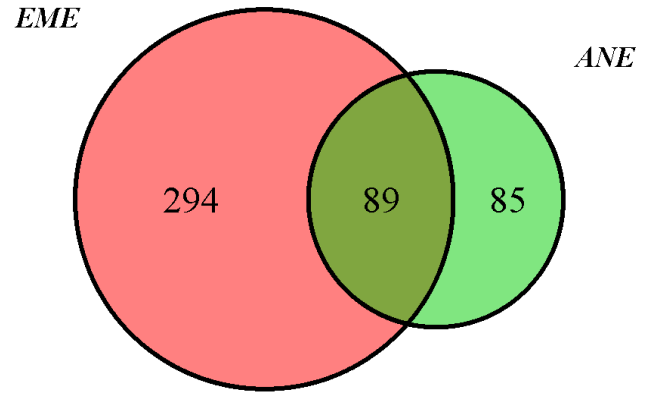

**C**

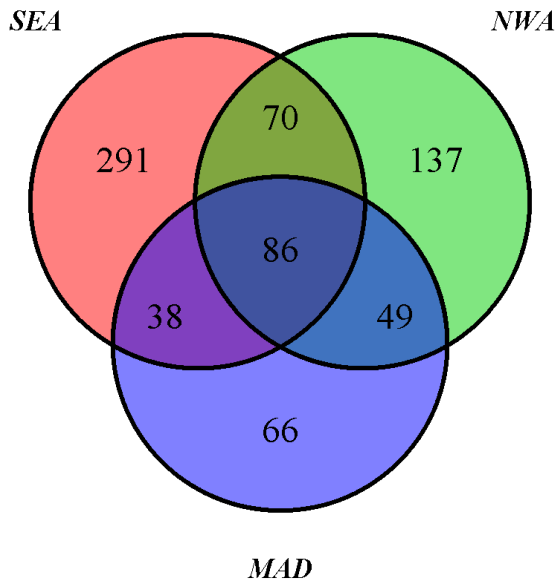

Supplement: 41437_2018_150_MOESM2_ESM.pdf [file 41437_2018_150_MOESM2_ESM.pdf]
